# Supplementary material for: Gustatory and olfactory dysfunctions in hospitalised patients with COVID-19 pneumonia: a prospective study
Source: PubMed Central journal article supplement — BMJ Open. 2021 Aug 17;11(8):e040775. doi: 10.1136/bmjopen-2020-040775 (PMC8375450; doi:10.1136/bmjopen-2020-040775), 2021-08-17
Supplement: bmjopen-2020-040775.draft_revisions.pdf [file bmjopen-2020-040775.draft_revisions.pdf]

# BMJ Open

BMJ Open is committed to open peer review. As part of this commitment we make the peer review history of every article we publish publicly available.

When an article is published we post the peer reviewers' comments and the authors' responses online. We also post the versions of the paper that were used during peer review. These are the versions that the peer review comments apply to.

The versions of the paper that follow are the versions that were submitted during the peer review process. They are not the versions of record or the final published versions. They should not be cited or distributed as the published version of this manuscript.

BMJ Open is an open access journal and the full, final, typeset and author-corrected version of record of the manuscript is available on our site with no access controls, subscription charges or pay-per-view fees (<http://bmjopen.bmj.com>).

If you have any questions on BMJ Open's open peer review process please email [info.bmjopen@bmj.com](mailto:info.bmjopen@bmj.com)

# BMJ Open

## GUSTATORY AND OLFATORY DYSFUNCTION IN HOSPITALIZED PATIENTS WITH COVID-19 PNEUMONIA A PROSPECTIVE STUDY

|                               |                                                                                                                                                                                                                                                                                                                                                                                                                                                                                                                                                                                                                                                                                                                                                                                                                                                                                                                                                                                                                                                                                                                                                                                                                                                                                                                                                                                                                                                                                                                                                                                                                                                                                                                                                                                                                                                                                                                                                                                                                                                                                                                                                                          |
|-------------------------------|--------------------------------------------------------------------------------------------------------------------------------------------------------------------------------------------------------------------------------------------------------------------------------------------------------------------------------------------------------------------------------------------------------------------------------------------------------------------------------------------------------------------------------------------------------------------------------------------------------------------------------------------------------------------------------------------------------------------------------------------------------------------------------------------------------------------------------------------------------------------------------------------------------------------------------------------------------------------------------------------------------------------------------------------------------------------------------------------------------------------------------------------------------------------------------------------------------------------------------------------------------------------------------------------------------------------------------------------------------------------------------------------------------------------------------------------------------------------------------------------------------------------------------------------------------------------------------------------------------------------------------------------------------------------------------------------------------------------------------------------------------------------------------------------------------------------------------------------------------------------------------------------------------------------------------------------------------------------------------------------------------------------------------------------------------------------------------------------------------------------------------------------------------------------------|
| Journal:                      | <i>BMJ Open</i>                                                                                                                                                                                                                                                                                                                                                                                                                                                                                                                                                                                                                                                                                                                                                                                                                                                                                                                                                                                                                                                                                                                                                                                                                                                                                                                                                                                                                                                                                                                                                                                                                                                                                                                                                                                                                                                                                                                                                                                                                                                                                                                                                          |
| Manuscript ID                 | bmjopen-2020-040775                                                                                                                                                                                                                                                                                                                                                                                                                                                                                                                                                                                                                                                                                                                                                                                                                                                                                                                                                                                                                                                                                                                                                                                                                                                                                                                                                                                                                                                                                                                                                                                                                                                                                                                                                                                                                                                                                                                                                                                                                                                                                                                                                      |
| Article Type:                 | Original research                                                                                                                                                                                                                                                                                                                                                                                                                                                                                                                                                                                                                                                                                                                                                                                                                                                                                                                                                                                                                                                                                                                                                                                                                                                                                                                                                                                                                                                                                                                                                                                                                                                                                                                                                                                                                                                                                                                                                                                                                                                                                                                                                        |
| Date Submitted by the Author: | 21-May-2020                                                                                                                                                                                                                                                                                                                                                                                                                                                                                                                                                                                                                                                                                                                                                                                                                                                                                                                                                                                                                                                                                                                                                                                                                                                                                                                                                                                                                                                                                                                                                                                                                                                                                                                                                                                                                                                                                                                                                                                                                                                                                                                                                              |
| Complete List of Authors:     | <p>Inciarte, Alexy; Hospital Clínic de Barcelona, Infectious disease; Universidad de Barcelona Facultad de Medicina y Ciencias de La Salud, Cardozo, Celia; Hospital Clínic de Barcelona, Infectious Diseases Department</p> <p>Chumbita, Mariana; Hospital Clínic de Barcelona, Infectious Diseases Department; Hospital Clínic de Barcelona, Infectious Diseases Department</p> <p>ALCUBILLA, Pau; Hospital Clínic de Barcelona, Infectious Diseases Department; Universidad de Barcelona Facultad de Medicina y Ciencias de La Salud,</p> <p>Torres, Berta; Hospital Clínic de Barcelona, Infectious Diseases Department; Universidad de Barcelona Facultad de Medicina y Ciencias de La Salud,</p> <p>González Cordón, Ana; Hospital Clínic de Barcelona, Infectious Diseases Department; Universidad de Barcelona Facultad de Medicina y Ciencias de La Salud,</p> <p>Rico, Verónica; Hospital Clínic de Barcelona, Infectious Diseases Department; Universidad de Barcelona Facultad de Medicina y Ciencias de La Salud,</p> <p>Aguero, Daiana; Hospital Clínic de Barcelona, Infectious Diseases Department; Universidad de Barcelona Facultad de Medicina y Ciencias de La Salud,</p> <p>García-Pouton, Nicole; Hospital Clínic de Barcelona, Infectious Diseases Department; Universidad de Barcelona Facultad de Medicina y Ciencias de La Salud,</p> <p>Hernández-Meneses, Marta; Hospital Clínic de Barcelona, Infectious Diseases Department; Universidad de Barcelona Facultad de Medicina y Ciencias de La Salud,</p> <p>ALBIACH, Laia; Hospital Clínic de Barcelona, Infectious Diseases Department; Universidad de Barcelona Facultad de Medicina y Ciencias de La Salud,</p> <p>Meira, Fernanda; Hospital Clínic de Barcelona, Infectious Diseases Department; Universidad de Barcelona Facultad de Medicina y Ciencias de La Salud,</p> <p>De la Mora, Lorena ; Hospital Clínic de Barcelona, Infectious Diseases Department; Universidad de Barcelona Facultad de Medicina y Ciencias de La Salud,</p> <p>Linares, laura; Hospital Clínic de Barcelona, Infectious Diseases Department; Universidad de Barcelona Facultad de Medicina y Ciencias</p> |

|           |                                                                                                                                                                                                                                                                                                                                                                                                                                                                                                                                                                                                                                                                                                                                                                                                                                                                                                                                                                                                                                                                                                                                                                                                                                                                                                                                                                                                                                                                                                                                                                                                                                                                                                                                                                                                                                                                                                                                                                                                                                                                                                                                                                                                                                                                                                                                                                                                                                                                                                                                                                                                                                                                                                                                                                                                                            |
|-----------|----------------------------------------------------------------------------------------------------------------------------------------------------------------------------------------------------------------------------------------------------------------------------------------------------------------------------------------------------------------------------------------------------------------------------------------------------------------------------------------------------------------------------------------------------------------------------------------------------------------------------------------------------------------------------------------------------------------------------------------------------------------------------------------------------------------------------------------------------------------------------------------------------------------------------------------------------------------------------------------------------------------------------------------------------------------------------------------------------------------------------------------------------------------------------------------------------------------------------------------------------------------------------------------------------------------------------------------------------------------------------------------------------------------------------------------------------------------------------------------------------------------------------------------------------------------------------------------------------------------------------------------------------------------------------------------------------------------------------------------------------------------------------------------------------------------------------------------------------------------------------------------------------------------------------------------------------------------------------------------------------------------------------------------------------------------------------------------------------------------------------------------------------------------------------------------------------------------------------------------------------------------------------------------------------------------------------------------------------------------------------------------------------------------------------------------------------------------------------------------------------------------------------------------------------------------------------------------------------------------------------------------------------------------------------------------------------------------------------------------------------------------------------------------------------------------------------|
|           | <p>de La Salud,<br/>Puerta-Alcalde, Pedro; Hospital Clínic de Barcelona, Infectious Diseases<br/>Department; Universidad de Barcelona Facultad de Medicina y Ciencias<br/>de La Salud,<br/>Macaya, Irene; Hospital Clínic de Barcelona, Infectious Diseases<br/>Department; Universidad de Barcelona Facultad de Medicina y Ciencias<br/>de La Salud,<br/>Mensa, Josep; Hospital Clínic de Barcelona, Infectious Diseases<br/>Department<br/>Laguno, Montse; Hospital Clinic de Barcelona, Infectious disease;<br/>Universidad de Barcelona Facultad de Medicina y Ciencias de La Salud,<br/>AMBROSIONI, Juan ; Hospital Clinic de Barcelona, Infectious disease;<br/>Universidad de Barcelona Facultad de Medicina y Ciencias de La Salud,<br/>Ramos, Angela; Hospital Clinic de Barcelona, Infectious disease;<br/>Universidad de Barcelona Facultad de Medicina y Ciencias de La Salud,<br/>Morata, Laura; Hospital Clinic de Barcelona, Infectious disease;<br/>Universidad de Barcelona Facultad de Medicina y Ciencias de La Salud,<br/>Bodro, Marta; Hospital Clinic de Barcelona, Infectious disease;<br/>Universidad de Barcelona Facultad de Medicina y Ciencias de La Salud,<br/>Moreno-García, Estela ; Universidad de Barcelona Facultad de Medicina y<br/>Ciencias de La Salud, ; Universidad de Barcelona Facultad de Medicina y<br/>Ciencias de La Salud,<br/>Moreno, Antonio ; Hospital Clinic de Barcelona, Infectious disease;<br/>Universidad de Barcelona Facultad de Medicina y Ciencias de La Salud,<br/>Sola, Montse; Hospital Clinic de Barcelona, Infectious disease;<br/>Universidad de Barcelona Facultad de Medicina y Ciencias de La Salud,<br/>Rojas, Jhon; Hospital Clinic de Barcelona, Infectious disease; Universidad<br/>de Barcelona Facultad de Medicina y Ciencias de La Salud,<br/>Leal, Lorna; Hospital Clinic de Barcelona, Infectious disease; Universidad<br/>de Barcelona Facultad de Medicina y Ciencias de La Salud,<br/>Torres, Manuel ; Universidad de Barcelona Facultad de Medicina y<br/>Ciencias de La Salud, ; Universidad de Barcelona Facultad de Medicina y<br/>Ciencias de La Salud,<br/>Garcia-Vidal, Carolina; Hospital Clinic de Barcelona, Infectious disease;<br/>Universidad de Barcelona Facultad de Medicina y Ciencias de La Salud,<br/>Martínez, Jose Antonio; Hospital Clínic de Barcelona, Infectious Diseases<br/>Department; University of Barcelona<br/>Alobid, Isam; Hospital Clinic de Barcelona, Unitat de Rinologia i Clínica<br/>de l'Olfacte, Servei d'Otorinolaringologia<br/>Soriano, Alex; Hospital Clínic de Barcelona, Infectious Diseases<br/>Department; University of Barcelona<br/>Garcia, Felipe; Hospital Clinic de Barcelona, Infectious disease;<br/>Universidad de Barcelona Facultad de Medicina y Ciencias de La Salud,</p> |
| Keywords: | INFECTIOUS DISEASES, Public health < INFECTIOUS DISEASES,<br>Infection control < INFECTIOUS DISEASES                                                                                                                                                                                                                                                                                                                                                                                                                                                                                                                                                                                                                                                                                                                                                                                                                                                                                                                                                                                                                                                                                                                                                                                                                                                                                                                                                                                                                                                                                                                                                                                                                                                                                                                                                                                                                                                                                                                                                                                                                                                                                                                                                                                                                                                                                                                                                                                                                                                                                                                                                                                                                                                                                                                       |
|           |                                                                                                                                                                                                                                                                                                                                                                                                                                                                                                                                                                                                                                                                                                                                                                                                                                                                                                                                                                                                                                                                                                                                                                                                                                                                                                                                                                                                                                                                                                                                                                                                                                                                                                                                                                                                                                                                                                                                                                                                                                                                                                                                                                                                                                                                                                                                                                                                                                                                                                                                                                                                                                                                                                                                                                                                                            |

SCHOLARONE™  
Manuscripts

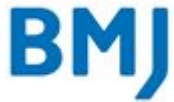

I, the Submitting Author has the right to grant and does grant on behalf of all authors of the Work (as defined in the below author licence), an exclusive licence and/or a non-exclusive licence for contributions from authors who are: i) UK Crown employees; ii) where BMJ has agreed a CC-BY licence shall apply, and/or iii) in accordance with the terms applicable for US Federal Government officers or employees acting as part of their official duties; on a worldwide, perpetual, irrevocable, royalty-free basis to BMJ Publishing Group Ltd ("BMJ") its licensees and where the relevant Journal is co-owned by BMJ to the co-owners of the Journal, to publish the Work in this journal and any other BMJ products and to exploit all rights, as set out in our [licence](#).

The Submitting Author accepts and understands that any supply made under these terms is made by BMJ to the Submitting Author unless you are acting as an employee on behalf of your employer or a postgraduate student of an affiliated institution which is paying any applicable article publishing charge ("APC") for Open Access articles. Where the Submitting Author wishes to make the Work available on an Open Access basis (and intends to pay the relevant APC), the terms of reuse of such Open Access shall be governed by a Creative Commons licence – details of these licences and which [Creative Commons](#) licence will apply to this Work are set out in our licence referred to above.

Other than as permitted in any relevant BMJ Author's Self Archiving Policies, I confirm this Work has not been accepted for publication elsewhere, is not being considered for publication elsewhere and does not duplicate material already published. I confirm all authors consent to publication of this Work and authorise the granting of this licence.

# GUSTATORY AND OLFACTORY DYSFUNCTION IN HOSPITALIZED PATIENTS WITH COVID-19 PNEUMONIA A PROSPECTIVE STUDY

Alexy Inciarte, MD<sup>1</sup>; Celia Cardozo, MD<sup>1</sup>; Mariana Chumbita, MD<sup>1</sup>, Pau Alcubilla, MD<sup>1</sup>; Berta Torres MD, PhD<sup>1</sup>; Ana González-Cordón, MD, PhD<sup>1</sup>; Verónica Rico, MD<sup>1</sup>; Daiana Agüero, MD<sup>1</sup>; Nicole García-Pouton, MD<sup>1</sup>; Marta Hernández-Meneses, MD<sup>1</sup>; Laia Albiach, MD<sup>1</sup>; Fernanda Meira, MD<sup>1</sup>; Lorena De la Mora, MD<sup>1</sup>; Laura Linares, MD, PhD<sup>1</sup>; Pedro Puerta-Alcalde, MD, PhD<sup>1</sup>; Irene Macaya, MD<sup>1</sup>; Josep Mensa, MD<sup>1</sup>; Montse Laguno, MD, PhD<sup>1</sup>; Juan Ambrosioni, MD, PhD<sup>1</sup>; Angela Ramos, B.N<sup>1</sup>; Laura Morata, MD, PhD<sup>1</sup>; Marta Bodro, MD, PhD<sup>1</sup>; Estela Moreno-García, MD<sup>1</sup>; Antonio Moreno, MD<sup>1</sup>; Montse Solá, B.N<sup>1</sup>; Jhon Rojas, MD, PhD<sup>1</sup>; Lorna Leal, MD, PhD<sup>1</sup>; Manuel Torres, MD<sup>1</sup>; Carolina Garcia-Vidal, MD, PhD<sup>1</sup>; José Antonio Martínez, MD, PhD<sup>1</sup>; Isam Alobid; Alex Soriano, MD, PhD<sup>1</sup>; and Felipe García, MD, PhD<sup>1†</sup>.

**Running title:** Olfactory and gustatory dysfunction in COVID-19 Pneumonia.

<sup>1</sup>*Hospital Clínic of Barcelona, Infectious Diseases Department, University of Barcelona, Institut d'Investigacions Biomèdiques August Pi I Sunyer (IDIBAPS), Barcelona, Spain*

†Correspondence to: Dr. Felipe García, MD, PhD; Infectious Diseases Unit, Hospital Clínic, Villarroel, 170, 08036 Barcelona, Spain. Phone: 34932275586, FAX: 34934514438, E-mail: [fgarcia@clinic.cat](mailto:fgarcia@clinic.cat)

Manuscript word count; 2738.

## ABSTRACT

**Importance:** Identifying undetected clinical signs is imperative in the prevention of SARS-CoV-2.

**Objective:** To establish the prevalence of clinical gustatory and olfactory dysfunction in COVID-19 pneumonia patients. Clinical outcomes and recovery rates associated with gustatory and olfactory dysfunction were also assessed.

**Design:** A prospective study was performed in 80 COVID-19 pneumonia hospitalized patients. Patients were reevaluated daily at wards until discharge, gustatory and olfactory dysfunction symptoms were retrospectively collected from ER charts after first assessment. Follow-up was performed in telemedicine consultation.

**Setting:** The study was performed in a single-center hospitalization ward at a University hospital.

**Participants:** Consecutive patients with hospitalization criteria of COVID-19 pneumonia were eligible and those unable to talk, previous gustatory and olfactory dysfunction, and negative SARS-CoVID-19 PCR were excluded.

**Interventions:** Systematic assessment of gustatory and olfactory symptoms with standardized questions.

**Outcome(s):** Gustatory and olfactory dysfunction prevalence in COVID-19 pneumonia patients.

**Results:** Among the 80 individuals 62.5% were male, the median age was 57-years and 50% (n=40) had comorbidities. The prevalence of gustatory and olfactory dysfunction was 73.8% (n=59) [CI-95%, (63.8-83.8)], although only 26.3% (n=21) of the patients self-reported symptoms in the ER. Gustatory and olfactory changes were observed in 58.8% (n=47) and 55% (n=44) of cases, respectively and were the first symptoms in 25% (n=20) of patients. Anosmia was associated with

1  
2  
3 ageusia, OR:7 (CI-95%, 2.3-21.8 p=0.001). There was an association between hyporexia and  
4 gustatory dysfunction, OR:4.1 [CI-95%, 1.23-13.67 p=0.016]. No differences in clinical outcomes  
5 were observed when patients with and without gustatory and olfactory dysfunction were  
6 compared. Recovery rates of gustatory and olfactory dysfunction were 20% (n=10) and 85%  
7 (n=42), at day 7 and 45 respectively.  
8  
9  
10  
11  
12

13  
14  
15 **Conclusion:** The prevalence of gustatory and olfactory dysfunction in COVID-19 pneumonia was  
16 much higher than detected by self-reporting. Presence of gustatory and olfactory dysfunction was  
17 not a predictor of clinical outcome.  
18  
19  
20  
21  
22  
23  
24  
25  
26  
27  
28  
29  
30  
31  
32  
33  
34  
35  
36  
37  
38  
39  
40  
41  
42  
43  
44  
45  
46  
47  
48  
49  
50  
51  
52  
53  
54  
55  
56  
57

## Article Summary

- Prospective study design in consecutive patients with COVID-19 pneumonia.
- Prospective recovery rates of gustatory and olfactory function in COVID-19 pneumonia patients.
- Lack of validated olfactory and gustatory questionnaires.
- Lack of olfactory and gustatory quantitative assessment.
- The selected population represents mostly hospitalized patients excluding milder cases



## Introduction

SARS-CoV-2 is causing a pandemic with more than 2.9 million reported cases and it has caused more than 1900000 deaths so far **(1)**. In the absence of an effective vaccine, basic strategies to avoid the spread of highly contagious infections include the early recognition of cases. Therefore it is highly important to identify potential undetected early clinical signs, given the possibility of early transmission as described in several studies (2-4). In this scenario, establishing contact tracing of suspected cases with key clinical findings is of utmost importance according to the latest recommendations of the world health organization **(5)**. In addition, prompt diagnosis and treatment of any potentially severe viral infection is essential to improve the clinical outcomes.

Gustatory and olfactory dysfunction is an unrecognized condition not well defined in general medical practice, in which it is very difficult to establish causal relationships firmly. Among the etiologies, viruses are the most common ones; *Coronavirus*, *Influenza*, and *Picornavirus* have been detected in nasal secretions in smell studies, with a wide range of severity and even permanent loss of smell and taste **(6)**. The consequences of gustatory and olfactory dysfunction compromise the quality of life and the mood state **(7)**.

In the initial reports of the pandemic in Wuhan area, gustatory and olfactory dysfunction were not described **(8-10)** while a small retrospective study performed in Milan estimated a prevalence of gustatory and olfactory dysfunction around 34% of the patients hospitalized with COVID-19 infection **(11)**. Several reports from isolated sudden onset anosmia have also recently described in COVID-19 patients **(12,13)**. A recently published

1  
2  
3 multicenter-cross-sectional study performed in France and Belgium reported a prevalence  
4  
5 of 85% of smell and gustatory dysfunction in mild cases **(14)**. However, the incidence in  
6  
7 severe cases requiring hospital admission needs to be defined. Since the onset of the  
8  
9 pandemic in Barcelona, there are a great number of self-reported gustatory and olfactory  
10  
11 symptoms in hospitalized pneumonia patients with a confirmed COVID-19 in our health  
12  
13 care center. The present study aims to estimate the prevalence, clinical traits, and  
14  
15 evolution of gustatory and olfactory dysfunction in patients hospitalized for COVID-19  
16  
17 associated pneumonia.  
18  
19  
20  
21  
22  
23  
24  
25  
26  
27  
28  
29  
30  
31  
32  
33  
34  
35  
36  
37  
38  
39  
40  
41  
42  
43  
44  
45  
46  
47  
48  
49  
50  
51  
52  
53  
54  
55  
56  
57  
58  
59  
60

## **Materials and methods**

### **Study design**

We performed a prospective assessment to patients consecutively admitted to a dedicated ward where attending physicians evaluated gustatory and olfactory dysfunction. After the initial evaluation a retrospective review of the ER charts prior admission was also reported to determine self-report. The study was conducted in the hospital clinic of Barcelona, a tertiary University reference center. The study populations were patients with COVID-19 pneumonia admitted from february 28th to april 24<sup>th</sup> in one of the hospitalization wards. Data collection was performed on april 30<sup>th</sup>.

The main objective of this study was to determine the proportion of gustatory and olfactory dysfunction in hospitalized patients with the diagnosis of COVID-19 pneumonia. Secondary endpoints were; to characterize clinical traits, to describe laboratory values, to recognize factors associated with gustatory and olfactory dysfunction, to explore potential differential outcomes between patients with and without gustatory and olfactory dysfunction and to examine gustatory and olfactory recovery rates trough time.

### **Patients**

SARS-CoV-2 infection was confirmed by either viral by real-time polymerase chain reaction (PCR) detection in a nasopharyngeal swab or clinical and radiological characteristics according to the ECDC criteria **(15)**, which states the following: 1) acute respiratory tract infection (sudden onset of cough, fever, shortness of breath), 2) severe acute respiratory infection (fever and at least one sign/symptom of respiratory disease (e.g., cough, fever,

1  
2  
3 shortness breath) requiring hospitalization with unilateral or bilateral interstitial infiltrate  
4  
5 in the chest-X ray. This clinical definition was implemented by the 15<sup>th</sup> of March onwards  
6  
7 when the percentage of positive microbiologically documented cases was higher than 70%  
8  
9 from the total of the collected samples. Patients with prior dysfunctions, unable to talk,  
10  
11 with mental impairment and with negative SARS-CoV-2 results were excluded from the  
12  
13 analysis. Inclusion of consecutive patients from the same ward were established to avoid  
14  
15 selection bias, also patients with direct admission to the ICU, and posterior discharge to  
16  
17 the ward were excluded to avoid memory bias.  
18  
19  
20  
21

## 22 **Data Collection**

23  
24  
25  
26 Directed anamnesis was performed to each patient upon arrival to the ward, including  
27  
28 baseline characteristics, demographics and classical pneumonia signs. Patients were asked  
29  
30 for gustatory and olfactory dysfunction symptoms such as: ageusia, dysgeusia, anosmia  
31  
32 and hyposmia. The following questions were asked systematically to all patients; have you  
33  
34 noticed any sudden and recent changes in smell and taste? If it was positive, was this the  
35  
36 first symptom?, is there a total reduction of taste and smell, is there a partial reduction of  
37  
38 taste and smell?, do the symptoms have disappeared?, when does symptoms disappear?.  
39  
40 Gustatory and olfactory dysfunction was reevaluated at the moment of discharge and  
41  
42 post-discharge by telemedicine consultations where they were asked if, they had  
43  
44 resolution of the symptoms, if there was a partial or total recovery?, and when the  
45  
46 symptoms resolved. During admission further laboratory tests (liver enzymes, creatinine,  
47  
48 C-reactive protein, D-dimer, leucocytes count, CD4, CD8, CD3 count ferritin, and  
49  
50 procalcitonin) were performed to all patients. The last follow-up date was on April 24<sup>th</sup>.  
51  
52  
53  
54  
55  
56  
57

1  
2  
3 For data collection, variables were extracted from electronic health records in the SAP 740  
4 Hospital Information System© (Societas Europaea, Walldorf, Germany). The results  
5  
6 obtained were included in a database created with the program MICROSOFT EXCEL© for  
7  
8 later analysis with the statistical package SPSS v18.0© (IBM corporation, Armonk, New  
9  
10 York, USA).  
11  
12  
13  
14

### 15 **Statistical analysis**

16  
17 The primary endpoint of the study was the proportion of patients with gustatory and  
18 olfactory dysfunction presented in percentages with a confidence level of 95% and a  
19 confidence interval of 10.5. For analyzing categorical variables compared between groups  
20 the Fisher's exact test was performed; significant p values were shown in Odds ratios and  
21 confidence intervals. The significance level was p-value <0.05. The inferential analysis of  
22 continuous variables, such as laboratory values, was performed using parametric tests  
23 (Student's t-test); Pearson test was performed to correlate the duration of the symptoms  
24 and inflammatory markers. Missing data was reduced by using an operator manual at the  
25 start of the study and carefully collecting the data. The missed data was managed with the  
26 listwise selection approach.  
27  
28  
29  
30  
31  
32  
33  
34  
35  
36  
37  
38  
39  
40  
41

### 42 **Sample Size calculation**

43  
44 An estimated sample size of 80 patients would allow an accuracy of 10.5% with a  
45 confidence interval of 95% for an expected prevalence of 33% as shown in the previous  
46 study by Giacomelli et al. **(11)**  
47  
48  
49  
50  
51  
52  
53  
54  
55  
56  
57

### **Ethics.**

The hospital's research ethics committee and the competent Spanish authorities approved the protocol describing the project proposed by the researcher (approval number HCB/2020/0458). The processing, reporting, and transfer of personal data for all participating subjects complied with the provisions in Organic Act 15/1999 of 13 December (Spanish Royal Decree 1720/2007 of 21 December), and the current Regulation EU 2016/679 of the European Parliament and the European Council at April 27, 2016, being mandatory after May 25, 2018, on the Protection of Personal Data and guarantee of digital rights. The patients either signed written consent or when it was not possible due to the pandemic and isolation measure an oral consent was given by the patient and it was recorded in the Electronic Clinical Documentation.

**Patient and public involvement:** The patients were not involved in the study described.

## **Results**

### **Baseline characteristics**

Of the 1738 patients with COVID-19 who have been admitted in the hospital from February 28<sup>th</sup> to April 24<sup>th</sup>, 1371 were hospitalized in several hospitalization wards and 337 in the ICU. The analysis of gustatory and olfactory dysfunction was prospectively performed in 80 patients as it is shown in the flow chart, [Figure 1]. The median (IQR) age was 57 (43-70) years old, 62.5 % were males. Eleven patients (14%) were health care workers. The origin was mostly European 71% (n=57) and Latin American 25% (n=20). Comorbidities were present in 50% (n=40) of patients. The median (IQR) time from symptoms onset to hospital admission was 8 (5-10) days, and the median (IQR) length of stay (LOS) was 8 (5-12.5) days [Table 1].

### **Gustatory and olfactory dysfunction**

The main clinical symptoms reported by patients are depicted in table 1. The prevalence of gustatory and olfactory dysfunction was found in this sample to be 73.8 % (n=59) [95 % (CI 63.8% to 83.8 %)]. Separately, gustatory and olfactory dysfunction was present in 58.8% (n=47) and 55% (n=44) of cases, respectively. Anosmia was the most frequent symptom present in 46.3% (n=37), followed by dysgeusia in 41.3 % (n=33), ageusia in 28.3% (n=23) and hyposmia in 15% (n=12). In 21% (n=7) of the patients with dysgeusia, it was described as salty taste. There was an association between the coexistence of ageusia and anosmia, OR: 7 [IC: 95 2.26 to 21.8 p= 0.001]. Gustatory and olfactory dysfunction was the first symptom in 25% (n=20) of the cases. Only in one case, gustatory and olfactory dysfunction appeared 7 days after admission; the rest of the patients had gustatory and olfactory

1  
2  
3 symptoms before hospital admission. In the ER only 26.3 % (n=21) of the patients  
4 reported olfactory-gustatory dysfunction. ER physicians were more likely to report  
5 positive clinical findings rather than negative findings (90.5% vs. 9.5%), OR: 4.6 [0.97-21.95  
6 IC: 95 p= 0.039]. Among the classical pneumonia symptoms fever was present in 89%  
7 (n=71) of the patients and it was the most frequent consulting symptom in the ER 53.8%  
8 (n=43). The second most common symptom was coughing 77.5% (n=62), followed by  
9 dyspnea 58.8% (47%), asthenia 56.3% (n=45), myalgia 50% (n=40), hyporexia 38% (n=33);  
10 vomiting 8.8 % (n=7) and skin lesions 6.3% (n=5) were uncommon [Figure 2]. There was an  
11 association between hyporexia with gustative dysfunction, OR: 4.1 [1.23 to 13.67 IC: 95 p=  
12 0.016], also there was association between cough and presence of gustatory and olfactory  
13 dysfunction, OR: 1.2 [0.12 to 12.86 IC: 95, p= 0.046]. [Table 1].  
14  
15  
16  
17  
18  
19  
20  
21  
22  
23  
24  
25  
26  
27  
28  
29

30 Among laboratory abnormalities, CRP values were elevated at admission in 91.8% cases,  
31 along with lymphopenia 98.8%, other common findings were elevation of lactate  
32 dehydrogenase 76.2%, D-Dimer 66.2 %, and hyperferritinemia 63.2%. [table 2].  
33  
34  
35  
36  
37  
38

39 There were differences between AST and ALT values between those with gustatory-  
40 olfactory dysfunction and those without symptoms [(33 vs. 61 UI/l) p=0.019 and (28 vs.  
41 49) p= 0.003], respectively. No differences in the others laboratory findings were found  
42 between the studied groups [Table 2].  
43  
44  
45  
46  
47  
48

### 49 **Treatment prescribed**

50 All the patients received hydroxycloquine and azithromycin, about 91.3 % (n=73) of the  
51 patients received Lopinavir boosted with ritonavir, 38.8% (n=31), Interleukin blockers and  
52  
53  
54  
55  
56  
57



1  
2  
3 30.4% (n=24) corticosteroids. A few started teicoplanin 18.8% (n=15), and Interferon 7.6%  
4  
5 (n=6). Oxygen supplementation was required in 69.8% (n=55) of the patients and 10%  
6  
7 (5%) required intubation. No differences were detected between study groups [Table 3].  
8  
9

### 10 11 **Clinical outcomes**

12  
13 A total of 90% (n=73) patients were discharged at the moment of this publication and  
14  
15 13.8% (n=11) required ICU during the admission, none of them died. After discharge 87%  
16  
17 (n=67) had a telemedicine follow-up to check on their status. There were not readmission  
18  
19 episodes.  
20  
21

22  
23 There was no association between outcomes in patients with gustatory and olfactory  
24  
25 dysfunction and those without gustatory and olfactory dysfunction, in terms of ICU  
26  
27 admission, LOS, SpO<sub>2</sub>/FiO<sub>2</sub> ratio, oxygen supplementation, respiratory distress or  
28  
29 organizing pneumonia. Pulmonary embolism was associated with the absence of gustatory  
30  
31 and olfactory dysfunction (21% vs 0) p=0.0001. [Table 3].  
32  
33  
34  
35

### 36 37 **Gustatory and olfactory outcomes**

38  
39 From the 59 patients with gustatory-olfactory dysfunction were 50 were reassessed for  
40  
41 follow-up. At day 7 after discharge 20% (n=10) had recovered gustatory and olfactory  
42  
43 function, in days 14, 30 and 45 recovery rates were 28% (n=14), 56% (n=28) and 84%  
44  
45 (n=42) respectively. The median time of recovery was 14 days (7-30), [Figure 3].  
46  
47  
48  
49

50  
51 The time of olfactory-gustatory recovery was positively correlated with age r: 0.48 p= 0.03  
52  
53 and ferritin levels r: 0.353 p=0.037. There was no correlation with severity degree of  
54  
55 respiratory function or any other abnormal laboratory values.  
56  
57

## Discussion

This is a prospective study evaluating the prevalence of gustatory and olfactory dysfunction in hospitalized patients. We found a prevalence of 74% in all patients admitted to a hospital ward with COVID-19 pneumonia who could be questioned. In a previous study in hospitalized patients overall prevalence was reported to be 33% **(11)**.

The main reason for this discrepancy could be related to: first, the retrospective design of that study, second the reassessment of the ER electronic health records in hospitalization wards demonstrated an unrecognized prevalence of gustatory and olfactory dysfunction of 53% in this prospective cohort. In fact, short communications reports in Italy already acknowledge a self-reported prevalence of gustatory and olfactory dysfunction in retrospective charts of 19 % **(16)**.

In our cohort, gustatory and olfactory dysfunction syndrome was almost as prevalent as fever and cough, the classical symptoms of viral pneumonia. In the context of flu-like symptoms along with gustatory- olfactory dysfunction syndrome, the possibility of COVID-19 must be addressed. In a recent case-control study gustatory and olfactory dysfunction was 10 times higher in patients with PCR positive results than those with negative results **(17)**.

Our study reported 55% of anosmia, in contrast, Lechein et al, reported anosmia in 86% patients in the setting of a symptom-oriented otorhinolaryngology specialized consultation; they were younger patients, without comorbidities and most of them were health care providers as opposed to our older and more comorbid cohort of hospitalized

1  
2  
3 patients. An Iranian case-control study reported olfactory changes in nearly 98% of de  
4  
5 COVID-19 patients with a median age of 46 years evaluated by quantitative testing of the  
6  
7 sense of smell. This study suggests that hyposmia quantitative testing might serve as a  
8  
9 rapid alternative diagnostic to screen for SARS-CoV-2 **(18)**. The role of this test in older  
10  
11 patients remains unclear due to the related age changes in the smell function **(19)**.  
12  
13  
14  
15

16 Similar clinical signs and symptoms were observed between patients with and without  
17  
18 gustatory and olfactory dysfunction. Coughing was observed more frequently in patients  
19  
20 with gustatory and olfactory dysfunction but a more severe respiratory syndrome was not  
21  
22 observed. Gustatory dysfunction was associated with hyporexia, which might be  
23  
24 particularly relevant for patient's quality of life and activities of daily life especially if it is  
25  
26 persistent **(20-21)**.  
27  
28  
29  
30

31 There were no major alterations in laboratory values. A mild to moderate elevation of the  
32  
33 liver enzymes were common in the absence of GOD symptoms, no case of acute liver  
34  
35 failure was reported. Although it is difficult to establish an explanation for these findings,  
36  
37 it could be due to inflammatory changes in the liver, or related to a different tissue  
38  
39 expression of receptors and entry molecules. ACE2 and TMPRSS2 are expressed in cells  
40  
41 from multiple tissues including olfactory cells and liver, the degree in which tropism might  
42  
43 affect different tissues is not well established **(22)**.  
44  
45  
46  
47  
48

49 Clinical outcomes were similar in both groups, except for the presence of pulmonary  
50  
51 embolism in 20% of patients without gustatory and olfactory dysfunction symptoms, it  
52  
53 could not be excluded from the presence confounding factors associated with pulmonary  
54  
55  
56  
57

1  
2  
3 embolism such as tromboprophylaxis (23), and further investigation should be  
4  
5 implemented to validate these results.  
6  
7

8  
9 Lechein et al, reported that recovery olfactory rates were 72% on day 8. Since our study  
10  
11 represented olfactory and gustatory outcomes together establishing comparisons might  
12  
13 be difficult, however, we found recovery rates of just 20% on day 7 and 84% on day 45.  
14  
15 Another possibility for this discrepancy might be the older age of our cohort and the more  
16  
17 severe clinical manifestations of COVID-19.  
18  
19

20  
21 Although no correlation between etiopathogenic factors and the length of gustatory and  
22  
23 olfactory function recovery has been made so far, the inflammatory reaction process  
24  
25 might play a role. Our data support that higher levels of ferritin and older age are  
26  
27 associated with longer recovery rates. Ferritin levels have been reported in previous  
28  
29 studies to be markedly higher in severe cases than in moderate cases of COVID-19 with  
30  
31 longer recovery rates and also older age was associated with higher disease severity (24-  
32  
33  
34  
35  
36  
37  
38  
39  
40  
41  
42  
43  
44  
45  
46  
47  
48  
49  
50  
51  
52  
53  
54  
55  
56  
57  
58  
59  
60  
26).

### Strengths and weaknesses of the study

43  
44  
45  
46  
47  
48  
49  
50  
51  
52  
53  
54  
55  
56  
57  
58  
59  
60  
The main limitation of this study was, the lack of validated olfactory and gustatory  
questionnaires based on the smell and taste component which could give a more  
standardized approach and the impossibility to perform olfactory-gustatory testing using  
quantitative measurements, still a standardized non-validated questionnaire was  
implemented and used systematically in all patients. Consecutive patients were included  
in this study to minimize selection bias, although selection could still be a cause of bias in

1  
2  
3 our data. The selected population represents mostly hospitalized patients excluding  
4  
5 milder cases without pulmonary involvement and the most critical with direct admission  
6  
7 to the ICU unit.  
8  
9

### 10 11 **Conclusions and policy implications** 12

13  
14 There is high prevalence of gustatory and olfactory dysfunction in COVID-19 pneumonia  
15  
16 hospitalized patients. Self-report rates are low in our population. To improve surveillance  
17  
18 in this pandemic it is strongly suggested redefine case definition for COVID-19 in  
19  
20 international guidelines.  
21  
22  
23  
24  
25  
26  
27  
28  
29  
30  
31  
32  
33  
34  
35  
36  
37  
38  
39  
40  
41  
42  
43  
44  
45  
46  
47  
48  
49  
50  
51  
52  
53  
54  
55  
56  
57

1  
2  
3 **Acknowledgements:** HIV Unit: Jose-luis Blanco, Maria Martinez-rebollar, Esteban Martinez, Josep  
4 Mallolas, Pilar Callau. All the personnel of Medical Intensive Care Unit: Josep Maria Nicolás Pedro  
5 Castro, Sara Fernández and Adrian Téllez. Department of International Health: Alex Almuedo-  
6 Riera, Jose Muñoz, Daniel Camprubi Ferrer, Maria Teresa de Alba, Marc Fernandez, Elisabet Ferrer,  
7 Berta Grau, Helena Marti, Magdalena Muelas, Maria Jesus Pinazo, Natalia Rodríguez, Montserrat  
8 Roldan, Carme Subira, Isabel Vera, Nana Williams.

9  
10  
11  
12 **Financial disclosure:** Funding for dissemination plans Institut d'Investigacions Biomèdiques August  
13 Pi i Sunyer (IDIBAPS). All the authors are independent from the funding organization.

14  
15  
16  
17 **Contributorship statement :** AI, CC, MC, PA,BT, AGC, VR, DA, NGP, MHM, LA, JR, FM, LDL, LL, PPA,  
18 IM, ML, JA, AR, LM, MB, EMG, AM, MS , performed clinical assessments. AI and FG designed the  
19 study, contributed to data analysis and wrote the first draft of the manuscript. AI, CC, MC, LL, MT  
20 were responsible for data entry. AI, CGV, JAM, IA, AS, LM, EG, VDB, CL, JGP, FG, critically reviewed  
21 the manuscript and agreed on its final version.

22  
23  
24  
25 **Transparency statement:** All the information displayed in the present manuscript is an honest,  
26 accurate, and transparent account of the study being reported; that no important aspects of the  
27 study have been omitted; and that any discrepancies from the study as originally planned (and, if  
28 relevant, registered) have been explained.

29  
30  
31  
32 **Data sharing statement:** Extra data will be available by emailing [ajinciar@clinic.cat](mailto:ajinciar@clinic.cat)

33  
34  
35  
36  
37  
38  
39  
40  
41  
42  
43  
44  
45  
46  
47 **Patient and public involvement:** The patients were not involved in the study described; there will  
48 be enlisting of patients in disseminating the research findings to the general population in primary  
49 care settings.

## References

1. COVID-19 Coronavirus Pandemic. Last updated: April 24, 2020, 15:33 GMT  
<https://www.worldometers.info/coronavirus/> Accessed April 30, 2020.
2. Nishiura H, Kobayashi T, Suzuki A, et al. **Estimation of the asymptomatic ratio of novel coronavirus infections (COVID-19)** [published online ahead of print, 2020 Mar 13]. *Int J Infect Dis.* 2020;S1201-9712(20)30139-9. doi:10.1016/j.ijid.2020.03.020.
3. Bai Y, Yao L, Wei T, et al. **Presumed Asymptomatic Carrier Transmission of COVID-19** [published online ahead of print, 2020 Feb 21]. *JAMA.* 2020;323(14):1406–1407. doi:10.1001/jama.2020.2565
4. Zhang J, Tian S, Lou J, **Chen Y. Familial cluster of COVID-19 infection from an asymptomatic.** *Crit Care.* 2020;24(1):119. Published 2020 Mar 27. doi:10.1186/s13054-020-2817-7
- 5.- **WHO. COVID-19: Operational guidance for maintaining essential health services during an outbreak.** <https://www.who.int/publications-detail/covid-19-operational-guidance-for-maintaining-essential-health-services-during-an-outbreak>. Accessed April 30, 2020.
6. Suzuki M1, Saito K, Murakami S et al. **Identification of viruses in patients with postviral olfactory dysfunction.** *Laryngoscope.* 2007 Feb;117(2):272-7.
7. Smeets M, Veldhuizen M, Galle S, et al. **Sense of smell disorder and health-related quality of life.** *Rehabil Psychol.* 2009;54:404–412.
8. Wang Z, Yang B, Li Q, Wen L, Zhang R. **Clinical Features of 69 Cases with Coronavirus Disease 2019 in Wuhan, China.** *Clin Infect Dis.* 2020; pii: ciaa272. doi: 10.1093/cid/ciaa272
9. Huang C, Wang Y, Li X, et al. **Clinical features of patients infected with 2019 novel coronavirus in Wuhan, China** [published correction appears in *Lancet.* 2020 Jan 30;:]. *Lancet,* 2020 ; 395(10223):497–506.

- 1  
2  
3 10.- The Novel Coronavirus Pneumonia Emergency Response Epidemiology Team. **The**  
4 **Epidemiological Characteristics of an Outbreak of 2019 Novel Coronavirus Diseases (COVID-19)**  
5 **China, 2020.** China CDC Weekly, 2020 ; 2:113-22.  
6  
7  
8  
9  
10  
11 11. Giacomelli A, Pezzati L1, Galli M et al **Self-reported olfactory and taste disorders in SARS-CoV-**  
12 **2 patients: a cross-sectional study.** Clinical Infectious Disease. 2020 Mar 26. pii: ciaa330. doi:  
13 10.1093/cid/ciaa330. [Epub ahead of print]  
14  
15  
16  
17  
18 12. Ollarves-Carrero MF, Rodriguez-Morales AG, Bonilla-Aldana DK, Rodriguez-Morales AJ.  
19 **Anosmia in a healthcare worker with COVID-19 in Madrid, Spain** [published online ahead of  
20 print, 2020 Apr 13]. Travel Med Infect Dis. 2020;101666. doi:10.1016/j.tmaid.2020.101666  
21  
22  
23  
24  
25  
26 13. Gane SB, Kelly C, Hopkins C. **Isolated sudden onset anosmia in COVID-19 infection. A novel**  
27 **syndrome?** [published online ahead of print, 2020 Apr 2]. Rhinology. 2020;10.4193/Rhin20.114.  
28 doi:10.4193/Rhin20.114  
29  
30  
31  
32  
33 14. Lechien JR, Chiesa-Estomba CM, De Siati DR, et al. **Olfactory and gustatory dysfunctions as a**  
34 **clinical presentation of mild-to-moderate forms of the coronavirus disease (COVID-19): a**  
35 **multicenter European study** [published online ahead of print, 2020 Apr 6]. Eur Arch  
36 Otorhinolaryngol. 2020;10.1007/s00405-020-05965-1. doi:10.1007/s00405-020-05965-1  
37  
38  
39  
40  
41  
42  
43 15. **Case definition and European surveillance for COVID-19, as of 2 March 2020.**  
44 [https://www.ecdc.europa.eu/en/case-definition-and-european-surveillance-human-infection-](https://www.ecdc.europa.eu/en/case-definition-and-european-surveillance-human-infection-novel-coronavirus-2019-ncov)  
45 [novel-coronavirus-2019-ncov](https://www.ecdc.europa.eu/en/case-definition-and-european-surveillance-human-infection-novel-coronavirus-2019-ncov). Accessed April 30, 2020.  
46  
47  
48  
49  
50  
51 16. Vaira LA, Salzano G, Deiana G, De Riu G. **Anosmia and Ageusia: Common Findings in COVID-19**  
52 **Patients** [published online ahead of print, 2020 Apr 1]. Laryngoscope. 2020;10.1002/lary.28692.  
53 doi:10.1002/lary.28692  
54  
55  
56  
57  
58  
59  
60



- 1  
2  
3 17. Yan CH, Faraji F, Prajapati DP, Boone CE, DeConde AS. Association **of chemosensory**  
4 **dysfunction and Covid-19 in patients presenting with influenza-like symptoms** [published online  
5 ahead of print, 2020 Apr 12]. *Int Forum Allergy Rhinol.* 2020;10.1002/alr.22579.  
6 doi:10.1002/alr.22579  
7  
8  
9  
10  
11  
12 18. Moein ST, Hashemian SMR, Mansourafshar B, Khorram-Tousi A, Tabarsi P, Doty RL. **Smell**  
13 **dysfunction: a biomarker for COVID-19** [published online ahead of print, 2020 Apr 17]. *Int Forum*  
14 *Allergy Rhinol.* 2020;10.1002/alr.22587. doi:10.1002/alr.22587  
15  
16  
17  
18  
19 19. Doty RL, Shaman P, Applebaum SL, Giberson R, Siksorski L, Rosenberg L. **Smell identification**  
20 **ability: changes with age.** *Science* 1984; 226: 1441-3.  
21  
22  
23  
24  
25 20. Miwa T, Furukawa M, Tsukatani T, Costanzo RM, DiNardo LJ, Reiter ER. **Impact of olfactory**  
26 **impairment on quality of life and disability.** *Arch Otolaryngol Head Neck Surg.* 2001;127(5):497–  
27 503. doi:10.1001/archotol.127.5.497  
28  
29  
30  
31  
32 21. Rusthen S, Young A, Herlofson BB, et al. **Oral disorders, saliva secretion, and oral health-**  
33 **related quality of life in patients with primary Sjögren's syndrome.** *Eur J Oral Sci.*  
34 2017;125(4):265–271. doi:10.1111/eos.12358  
35  
36  
37  
38  
39 22. Sungnak W, Huang N, Bécavin C, et al. **SARS-CoV-2 entry factors are highly expressed in nasal**  
40 **epithelial cells together with innate immune genes** [published online ahead of print, 2020 Apr  
41 23]. *Nat Med.* 2020;10.1038/s41591-020-0868-6. doi:10.1038/s41591-020-0868-6  
42  
43  
44  
45  
46  
47 23. Tang N, Bai H, Chen X, Gong J, Li D, Sun Z. **Anticoagulant treatment is associated with**  
48 **decreased mortality in severe coronavirus disease 2019 patients with coagulopathy.** *J Thromb*  
49 *Haemost.* 2020 Mar 27. doi: 10.1111/jth.14817  
50  
51  
52  
53  
54  
55  
56  
57

1  
2  
3 24. Ruan Q, Yang K, Wang W, Jiang L, Song J. **Clinical predictors of mortality due to COVID-19**  
4 **based on an analysis of data of 150 patients from Wuhan, China** [published online ahead of print,  
5  
6 2020 Mar 3] [published correction appears in Intensive Care Med. 2020 Apr 6;:]. Intensive Care  
7  
8 Med. 2020;1–3. doi:10.1007/s00134-020-05991-x  
9

10  
11  
12 25. Yang X, Yu Y, Xu J, Shu H, Xia J, Liu H, et al. **Clinical course and outcomes of critically ill**  
13 **patients with SARS-CoV-2 pneumonia in Wuhan, China: a single-centered, retrospective,**  
14 **observational study.** Lancet Respir Med 2020. doi:10.1016/S2213-2600(20)30079-5.  
15  
16  
17  
18

19  
20 26. Zhou F, Yu T, Du R, Fan G, Liu Y, Liu Z, et al. **Clinical course and risk factors for mortality of**  
21 **adult inpatients with COVID-19 in Wuhan, China: a retrospective cohort study.** Lancet 2020. Zhou  
22  
23 F, Yu T, Du R, Fan G, Liu Y, Liu Z, et al. Clinical course and risk factors for mortality of adult  
24  
25 inpatients with COVID-19 in Wuhan, China: a retrospective cohort study. Lancet 2020.  
26  
27  
28  
29  
30  
31  
32  
33  
34  
35  
36  
37  
38  
39  
40  
41  
42  
43  
44  
45  
46  
47  
48  
49  
50  
51  
52  
53  
54  
55  
56  
57

**Table 1. Baseline characteristics according to the presence of gustatory and olfactory dysfunction in patients with COVID-19 pneumonia.**

| VARIABLE                              | COHORT      | GOD        | Absence of GOD | p Value      |
|---------------------------------------|-------------|------------|----------------|--------------|
| N                                     | 80          | 59         | 21             |              |
| Median (IQR) Age                      | 57 (42-70)  | 58 (44-69) | 55 (38-72)     | 0.782        |
| Male, n (%)                           | 50 (63)     | 34 (59)    | 15 (71)        | 0.325        |
| RT-PCR (+) nasopharyngeal swab, n (%) | 73 (91.2)   | 55 (93)    | 19 (86)        | 0.985        |
| European, n (%)                       | 57 (71)     | 37 (64)    | 14 (67)        | 0.940        |
| Coexisting illness, n (%)             | 40 (50)     | 27 (47)    | 12 (57)        | 0.370        |
| Hypertension, n (%)                   | 22 (29)     | 17 (29)    | 5 (23)         | 0.738        |
| Diabetes, n (%)                       | 8 (10)      | 6 (10)     | 2 (10)         | 0.932        |
| Pulmonary disease, n (%)              | 8 (10)      | 7 (14)     | 1 (5)          | 0.168        |
| Oncologic disease, n (%)              | 5 (6)       | 2 (3)      | 3 (14)         | 0.76         |
| Heart disease, n (%)                  | 5(6)        | 3 (5)      | 2 (11)         | 0.453        |
| Health Care Worker, n (%)             | 11(14)      | 3 (14)     | 3 (14)         | 0,934        |
| Median (IQR) days from onset to ER    | 8 (5.25-10) | 8 (5-11)   | 7 (5.5-9)      | 0.135        |
| Fever, n (%)                          | 71 (89)     | 52 (88)    | 19 (91)        | 0.771        |
| Cough, n (%)                          | 62 (78)     | 49 (83)    | 13(62)         | <b>0.046</b> |
| Shortness of breath, n (%)            | 52 (65)     | 35 (59)    | 17 (81)        | 0.074        |
| Asthenia, n (%)                       | 45 (56)     | 33 (56)    | 12 (57)        | 0.934        |
| Myalgia, n (%)                        | 40 (50)     | 34 (53)    | 9 (43)         | 0.147        |
| Diarrhea, n (%)                       | 35 (44)     | 25 (42)    | 10 (48)        | 0.677        |
| hyporexia, n (%)                      | 33(38)      | 29 (49)    | 4 (19)         | <b>0.016</b> |
| Headache, n (%)                       | 28 (35)     | 24 (41)    | 4 (19)         | 0.061        |
| Arthralgia, n (%)                     | 10(13)      | 8(14)      | 2 (10)         | 0.545        |
| Chest Pain, n (%)                     | 9 (11)      | 6 (10)     | 3 (14)         | 0.608        |
| Odynophagia n, (%)                    | 7 (9)       | 6 (10)     | 1 (5)          | 0.451        |
| Vomiting, n (%)                       | 7 (9)       | 6 (10)     | 1 (5)          | 0.451        |
| Rash, n (%)                           | 5 (6)       | 5 (9)      | 0              | 0.168        |

IQR: interquartilic range. GOD, Gustatory and olfactory dysfunction.

**Table 2. Laboratory values according to the presence of gustatory and olfactory dysfunction in patients with COVID-19 pneumonia. (n=80)**

| VARIABLES                                    | COHORT         | GOD               | Absence of GOD  | p Value      |
|----------------------------------------------|----------------|-------------------|-----------------|--------------|
| N                                            | 80             | 59                | 21              |              |
| CRP mg/dL [ < 1.0 ]                          | 9 (3-14)       | 8 (3-16)          | 10 (5-13)       | 0.838        |
| LDH mg/dL [ < 234]                           | 310 (268-386)  | 309 (250-367)     | 342 (260-453)   | 0.109        |
| Ferritin mg/dL [ < 200]                      | 716 (256-1322) | 592 (241-1255)    | 1066 (300-1552) | 0.093        |
| AST UI/L [ 5.0 - 40.0 ]                      | 39 (25-61)     | 33 (22-50)        | 61 (39-94)      | <b>0.003</b> |
| ALT UI/L [ 5.0 - 40.0 ]                      | 29 (20-68)     | 28 (19-55)        | 49 (27-102)     | <b>0.019</b> |
| BT mg/dL [ 0.20 - 1.20 ]                     | 0.64 (0.8-0.4) | 0.6 (0.4-0.75)    | 0.8 (0.55-1.05) | 0.560        |
| LYM cells/mm <sup>3</sup> [4.00 - 11.00 ]    | 0.9 (0.6-1.3)  | 0.9 (0.6- 1.3)    | 0.8 (0.6-1.5)   | 0.820        |
| D-Dimer ng/ml [ < 500 ]                      | 800 (400-1200) | 700 (400-1100)    | 1000 (600-1800) | 0.251        |
| Platelets cells/mm <sup>3</sup> [130 - 400 ] | 212 (168-266)  | 213(170-265)      | 209 (150-281)   | 0.735        |
| Creatinine mg/dL [ 0.30 - 1.30 ]             | 0.6 (0.7-09)   | 0.78 (0.63-0.91)  | 0.86 (68-0.98)  | 0.630        |
| Calcium meq/l [ 8.5 - 9.5 ]                  | 8.2 (8-8.5)    | 8.2 (8-8.6)       | 8.1 (7.8 --8.3) | 0.735        |
| Cd4 Cels/μL [ 530 - 1300 ]                   | 356 (248-579)  | 358.5 (258.7-630) | 328 (225-464)   | 0.414        |
| Cd8 Cels/μL [ 330 - 920 ]                    | 225 (147-353)  | 241 (148 -256)    | 186 (140.7-396) | 0.934        |
| Cd3 Cels/μL [ 1000 - 2200 ]                  | 630 (404-1014) | 676 (459.5-1035)  | 496 (386-792)   | 0.310        |

CRP, C-re-active protein; LDH, Lactate deshydrogenase; AST, Aspartate tranferase ; ALT, Alanine tranferase; BT, Total bilirubine; LYM, lymphocyte; NEU, neutrophil; CD4, CD4+ count;CD8, CD8+ count; GOD, Gustatory and olfactory dysfunction.

**Table 3. Clinical outcomes according to the presence of gustatory and olfactory dysfunction in patients with COVID-19 pneumonia**

| VARIABLE                                       | COHORT        | GOD           | Absence of GOD | p Value |
|------------------------------------------------|---------------|---------------|----------------|---------|
| N                                              | 80            | 59            | 21             |         |
| LOS (IQR)                                      | 8 (4-11.75)   | 8 (4.2-11)    | 7 (4-14)       | 0.836   |
| SpO <sub>2</sub> /fiO <sub>2</sub> ratio (IQR) | 448 (245-247) | 451 (257-471) | 391 (197-471)  | 0.346   |
| Lopinavir/ritonavir, n (%)                     | 73 (94)       | 52 (91)       | 21 (100)       | 0.161   |
| Interferon, n (%)                              | 6 (8)         | 4 (7)         | 2 (10)         | 0.638   |
| Corticosteroid, n (%)                          | 24 (30)       | 15 (3)        | 9 (43)         | 0.147   |
| Interleukin blocker, n (%)                     | 33 (41)       | 22 (37)       | 11 (52)        | 0.228   |
| ICU admission, n (%)                           | 11 (14)       | 7 (12)        | 4 (19)         | 0.412   |
| Complication n, (%)                            | 32 (41)       | 20 (35)       | 12 (57)        | 0.07    |
| Oxygen requirement, n (%)                      | 55 (69)       | 40 (68)       | 15 (71)        | 0.758   |
| Orotraqueal intubation, n (%)                  | 8             | 5 (8.5)       | 3 (14)         | 0.867   |
| Respiratory distress, n (%)                    | 31            | 20 (34)       | 11 (52)        | 0.135   |
| Pulmonary embolism, n (%)                      | 5 (6)         | 0             | 5 (23)         | 0.0001  |
| Organizing pneumonia, n (%)                    | 10 (13)       | 5 (9)         | 5 (24)         | 0.068   |

LOS, length of stay; SpO<sub>2</sub>, peripheral capillary oxygen saturation; FiO<sub>2</sub>, Fraction of Inspired Oxygen; IQR, Interquartile range; GOD, Gustatory and olfactory dysfunction.

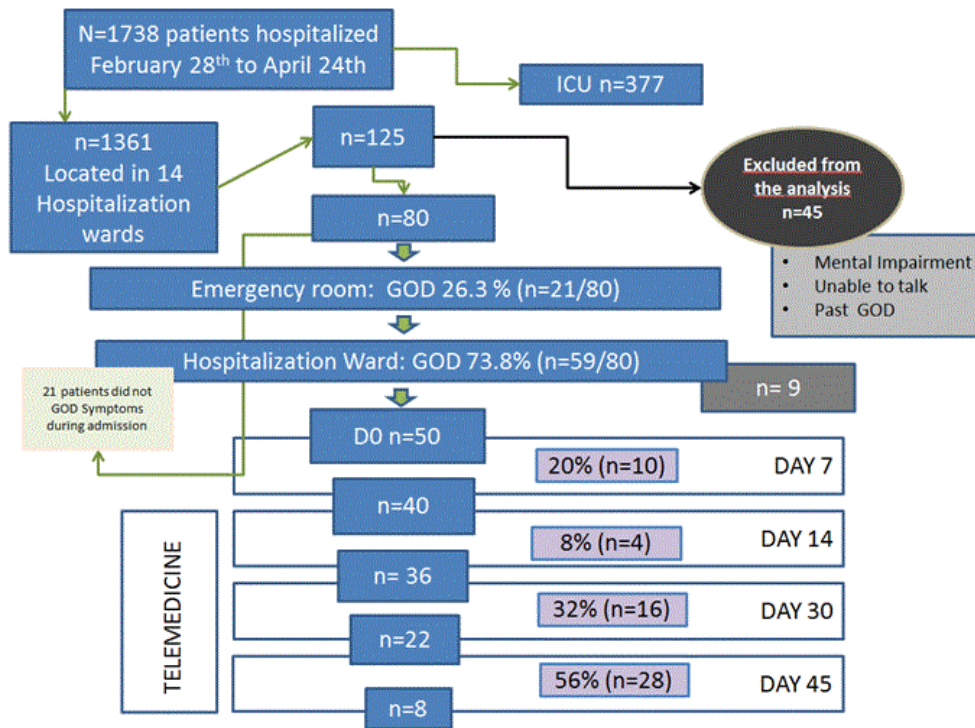

Figure 1. Study Flow Chart. Day 0: If the patient meets criteria is included in the study. Blue boxes represent individuals on follow-up with gustatory-olfactory dysfunction, lilac boxes represents individuals in which the recovery event develops. Gray boxes represent individuals lost to follow up. White boxes represent timelines and mode of follow-up.

244x190mm (72 x 72 DPI)

Figure 2. General symptoms in patients with COVID-19 pneumonia in absolute numbers (n=80)

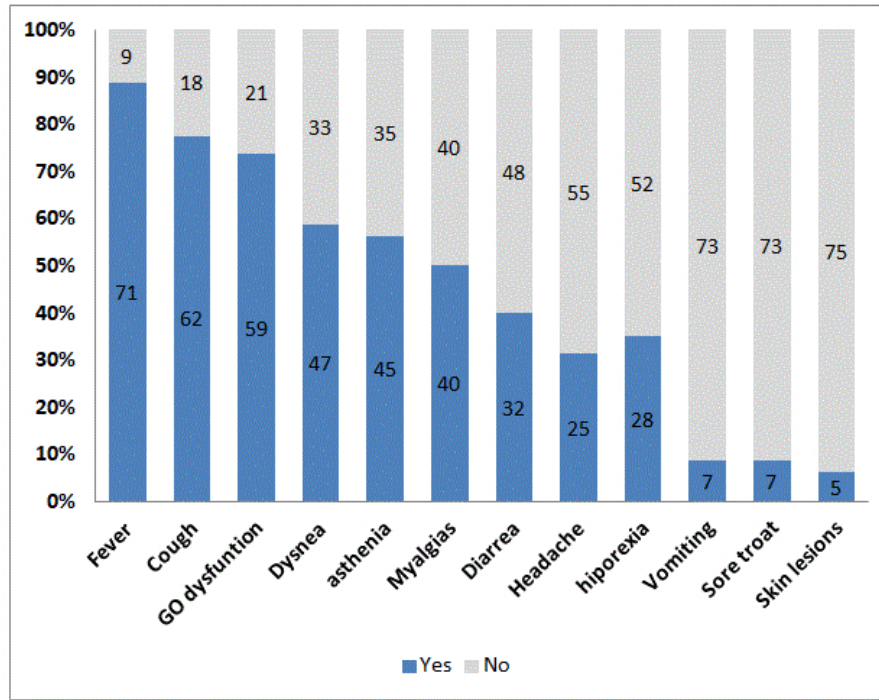

GOD: Gustatory and olfactory dysfunction

244x189mm (72 x 72 DPI)

Figure 3. Recovery rates of gustatory-olfactory dysfunction trough time at follow up post – discharge n=50

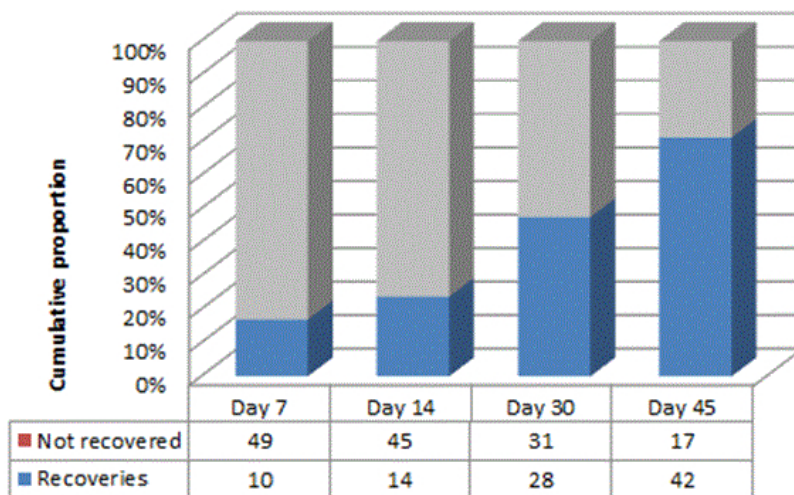

248x154mm (72 x 72 DPI)



**Section 1: What is already known on this topic?**

- Self reported prevalence in Pneumonia population.
- Prevalence in cross-sectional studies in mild disease forms in specific groups (health care workers) and specific consultation (ENT consultations)
- One study retrospective study of recovery rates in pauci symptomatic patients.

**Section 2: What this study adds?**

- Prevalence of gustatory and olfactory symptoms in COVID-19 pneumonia population.
- Prospective recovery rates in a more severe disease group (COVID-19 pneumonia patients)
- Our study suggest there is no association between severity outcomes of patients with gustatory and olfactory dysfunction and those who don't

**Implication:** Support a more generalized consensus of gustatory and olfactory symptoms in case definition of COVID-19 in international organizations.

# BMJ Open

## GUSTATORY AND OLFATORY DYSFUNCTION IN HOSPITALIZED PATIENTS WITH COVID-19 PNEUMONIA: A PROSPECTIVE STUDY

|                               |                                                                                                                                                                                                                                                                                                                                                                                                                                                                                                                                                                                                                                                                                                                                                                                                                                                                                                                                                                                                                                                                                                                                                                                                                                                                                                                                                                                                                                                                                                                                                                                                                                                                                                                                                                                                                                                                                                                                                                                                                                                                                                                                                                          |
|-------------------------------|--------------------------------------------------------------------------------------------------------------------------------------------------------------------------------------------------------------------------------------------------------------------------------------------------------------------------------------------------------------------------------------------------------------------------------------------------------------------------------------------------------------------------------------------------------------------------------------------------------------------------------------------------------------------------------------------------------------------------------------------------------------------------------------------------------------------------------------------------------------------------------------------------------------------------------------------------------------------------------------------------------------------------------------------------------------------------------------------------------------------------------------------------------------------------------------------------------------------------------------------------------------------------------------------------------------------------------------------------------------------------------------------------------------------------------------------------------------------------------------------------------------------------------------------------------------------------------------------------------------------------------------------------------------------------------------------------------------------------------------------------------------------------------------------------------------------------------------------------------------------------------------------------------------------------------------------------------------------------------------------------------------------------------------------------------------------------------------------------------------------------------------------------------------------------|
| Journal:                      | <i>BMJ Open</i>                                                                                                                                                                                                                                                                                                                                                                                                                                                                                                                                                                                                                                                                                                                                                                                                                                                                                                                                                                                                                                                                                                                                                                                                                                                                                                                                                                                                                                                                                                                                                                                                                                                                                                                                                                                                                                                                                                                                                                                                                                                                                                                                                          |
| Manuscript ID                 | bmjopen-2020-040775.R1                                                                                                                                                                                                                                                                                                                                                                                                                                                                                                                                                                                                                                                                                                                                                                                                                                                                                                                                                                                                                                                                                                                                                                                                                                                                                                                                                                                                                                                                                                                                                                                                                                                                                                                                                                                                                                                                                                                                                                                                                                                                                                                                                   |
| Article Type:                 | Original research                                                                                                                                                                                                                                                                                                                                                                                                                                                                                                                                                                                                                                                                                                                                                                                                                                                                                                                                                                                                                                                                                                                                                                                                                                                                                                                                                                                                                                                                                                                                                                                                                                                                                                                                                                                                                                                                                                                                                                                                                                                                                                                                                        |
| Date Submitted by the Author: | 23-Oct-2020                                                                                                                                                                                                                                                                                                                                                                                                                                                                                                                                                                                                                                                                                                                                                                                                                                                                                                                                                                                                                                                                                                                                                                                                                                                                                                                                                                                                                                                                                                                                                                                                                                                                                                                                                                                                                                                                                                                                                                                                                                                                                                                                                              |
| Complete List of Authors:     | <p>Inciarte, Alexy; Hospital Clínic de Barcelona, Infectious disease; Universidad de Barcelona Facultad de Medicina y Ciencias de La Salud, Cardozo, Celia; Hospital Clínic de Barcelona, Infectious Diseases Department</p> <p>Chumbita, Mariana; Hospital Clínic de Barcelona, Infectious Diseases Department; Hospital Clínic de Barcelona, Infectious Diseases Department</p> <p>ALCUBILLA, Pau; Hospital Clínic de Barcelona, Infectious Diseases Department; Universidad de Barcelona Facultad de Medicina y Ciencias de La Salud,</p> <p>Torres, Berta; Hospital Clínic de Barcelona, Infectious Diseases Department; Universidad de Barcelona Facultad de Medicina y Ciencias de La Salud,</p> <p>González Cordón, Ana; Hospital Clínic de Barcelona, Infectious Diseases Department; Universidad de Barcelona Facultad de Medicina y Ciencias de La Salud,</p> <p>Rico, Verónica; Hospital Clínic de Barcelona, Infectious Diseases Department; Universidad de Barcelona Facultad de Medicina y Ciencias de La Salud,</p> <p>Aguero, Daiana; Hospital Clínic de Barcelona, Infectious Diseases Department; Universidad de Barcelona Facultad de Medicina y Ciencias de La Salud,</p> <p>García-Pouton, Nicole; Hospital Clínic de Barcelona, Infectious Diseases Department; Universidad de Barcelona Facultad de Medicina y Ciencias de La Salud,</p> <p>Hernández-Meneses, Marta; Hospital Clínic de Barcelona, Infectious Diseases Department; Universidad de Barcelona Facultad de Medicina y Ciencias de La Salud,</p> <p>ALBIACH, Laia; Hospital Clínic de Barcelona, Infectious Diseases Department; Universidad de Barcelona Facultad de Medicina y Ciencias de La Salud,</p> <p>Meira, Fernanda; Hospital Clínic de Barcelona, Infectious Diseases Department; Universidad de Barcelona Facultad de Medicina y Ciencias de La Salud,</p> <p>De la Mora, Lorena ; Hospital Clínic de Barcelona, Infectious Diseases Department; Universidad de Barcelona Facultad de Medicina y Ciencias de La Salud,</p> <p>Linares, laura; Hospital Clínic de Barcelona, Infectious Diseases Department; Universidad de Barcelona Facultad de Medicina y Ciencias</p> |

|                                    |                                                                                                                                                                                                                                                                                                                                                                                                                                                                                                                                                                                                                                                                                                                                                                                                                                                                                                                                                                                                                                                                                                                                                                                                                                                                                                                                                                                                                                                                                                                                                                                                                                                                                                                                                                                                                                                                                                                                                                                                                                                                                                                                                                                                                                                                                                                                                                                                                                                                                                                                                                                                                                                                                                                                                                                                                           |
|------------------------------------|---------------------------------------------------------------------------------------------------------------------------------------------------------------------------------------------------------------------------------------------------------------------------------------------------------------------------------------------------------------------------------------------------------------------------------------------------------------------------------------------------------------------------------------------------------------------------------------------------------------------------------------------------------------------------------------------------------------------------------------------------------------------------------------------------------------------------------------------------------------------------------------------------------------------------------------------------------------------------------------------------------------------------------------------------------------------------------------------------------------------------------------------------------------------------------------------------------------------------------------------------------------------------------------------------------------------------------------------------------------------------------------------------------------------------------------------------------------------------------------------------------------------------------------------------------------------------------------------------------------------------------------------------------------------------------------------------------------------------------------------------------------------------------------------------------------------------------------------------------------------------------------------------------------------------------------------------------------------------------------------------------------------------------------------------------------------------------------------------------------------------------------------------------------------------------------------------------------------------------------------------------------------------------------------------------------------------------------------------------------------------------------------------------------------------------------------------------------------------------------------------------------------------------------------------------------------------------------------------------------------------------------------------------------------------------------------------------------------------------------------------------------------------------------------------------------------------|
|                                    | <p>de La Salud,<br/>Puerta-Alcalde, Pedro; Hospital Clínic de Barcelona, Infectious Diseases<br/>Department; Universidad de Barcelona Facultad de Medicina y Ciencias<br/>de La Salud,<br/>Macaya, Irene; Hospital Clínic de Barcelona, Infectious Diseases<br/>Department; Universidad de Barcelona Facultad de Medicina y Ciencias<br/>de La Salud,<br/>Mensa, Josep; Hospital Clínic de Barcelona, Infectious Diseases<br/>Department<br/>Laguno, Montse; Hospital Clinic de Barcelona, Infectious disease;<br/>Universidad de Barcelona Facultad de Medicina y Ciencias de La Salud,<br/>AMBROSIONI, Juan ; Hospital Clinic de Barcelona, Infectious disease;<br/>Universidad de Barcelona Facultad de Medicina y Ciencias de La Salud,<br/>Ramos, Angela; Hospital Clinic de Barcelona, Infectious disease;<br/>Universidad de Barcelona Facultad de Medicina y Ciencias de La Salud,<br/>Morata, Laura; Hospital Clinic de Barcelona, Infectious disease;<br/>Universidad de Barcelona Facultad de Medicina y Ciencias de La Salud,<br/>Bodro, Marta; Hospital Clinic de Barcelona, Infectious disease;<br/>Universidad de Barcelona Facultad de Medicina y Ciencias de La Salud,<br/>Moreno-García, Estela; Universidad de Barcelona Facultad de Medicina y<br/>Ciencias de La Salud, ; Universidad de Barcelona Facultad de Medicina y<br/>Ciencias de La Salud,<br/>Moreno, Antonio ; Hospital Clinic de Barcelona, Infectious disease;<br/>Universidad de Barcelona Facultad de Medicina y Ciencias de La Salud,<br/>Sola, Montse; Hospital Clinic de Barcelona, Infectious disease;<br/>Universidad de Barcelona Facultad de Medicina y Ciencias de La Salud,<br/>Rojas, Jhon; Hospital Clinic de Barcelona, Infectious disease; Universidad<br/>de Barcelona Facultad de Medicina y Ciencias de La Salud,<br/>Leal, Lorna; Hospital Clinic de Barcelona, Infectious disease; Universidad<br/>de Barcelona Facultad de Medicina y Ciencias de La Salud,<br/>Torres, Manuel ; Universidad de Barcelona Facultad de Medicina y<br/>Ciencias de La Salud, ; Universidad de Barcelona Facultad de Medicina y<br/>Ciencias de La Salud,<br/>Garcia-Vidal, Carolina; Hospital Clinic de Barcelona, Infectious disease;<br/>Universidad de Barcelona Facultad de Medicina y Ciencias de La Salud,<br/>Martínez, Jose Antonio; Hospital Clínic de Barcelona, Infectious Diseases<br/>Department; University of Barcelona<br/>Alobid, Isam; Hospital Clinic de Barcelona, Unitat de Rinologia i Clínica<br/>de l'Olfacte, Servei d'Otorinolaringologia<br/>Soriano, Alex; Hospital Clínic de Barcelona, Infectious Diseases<br/>Department; University of Barcelona<br/>Garcia, Felipe; Hospital Clinic de Barcelona, Infectious disease;<br/>Universidad de Barcelona Facultad de Medicina y Ciencias de La Salud,</p> |
| <b>Primary Subject<br>Heading</b>: | Infectious diseases                                                                                                                                                                                                                                                                                                                                                                                                                                                                                                                                                                                                                                                                                                                                                                                                                                                                                                                                                                                                                                                                                                                                                                                                                                                                                                                                                                                                                                                                                                                                                                                                                                                                                                                                                                                                                                                                                                                                                                                                                                                                                                                                                                                                                                                                                                                                                                                                                                                                                                                                                                                                                                                                                                                                                                                                       |
| Secondary Subject Heading:         | Epidemiology                                                                                                                                                                                                                                                                                                                                                                                                                                                                                                                                                                                                                                                                                                                                                                                                                                                                                                                                                                                                                                                                                                                                                                                                                                                                                                                                                                                                                                                                                                                                                                                                                                                                                                                                                                                                                                                                                                                                                                                                                                                                                                                                                                                                                                                                                                                                                                                                                                                                                                                                                                                                                                                                                                                                                                                                              |
| Keywords:                          | INFECTIOUS DISEASES, Public health < INFECTIOUS DISEASES,<br>Infection control < INFECTIOUS DISEASES                                                                                                                                                                                                                                                                                                                                                                                                                                                                                                                                                                                                                                                                                                                                                                                                                                                                                                                                                                                                                                                                                                                                                                                                                                                                                                                                                                                                                                                                                                                                                                                                                                                                                                                                                                                                                                                                                                                                                                                                                                                                                                                                                                                                                                                                                                                                                                                                                                                                                                                                                                                                                                                                                                                      |
|                                    |                                                                                                                                                                                                                                                                                                                                                                                                                                                                                                                                                                                                                                                                                                                                                                                                                                                                                                                                                                                                                                                                                                                                                                                                                                                                                                                                                                                                                                                                                                                                                                                                                                                                                                                                                                                                                                                                                                                                                                                                                                                                                                                                                                                                                                                                                                                                                                                                                                                                                                                                                                                                                                                                                                                                                                                                                           |

SCHOLARONE™  
Manuscripts



I, the Submitting Author has the right to grant and does grant on behalf of all authors of the Work (as defined in the below author licence), an exclusive licence and/or a non-exclusive licence for contributions from authors who are: i) UK Crown employees; ii) where BMJ has agreed a CC-BY licence shall apply, and/or iii) in accordance with the terms applicable for US Federal Government officers or employees acting as part of their official duties; on a worldwide, perpetual, irrevocable, royalty-free basis to BMJ Publishing Group Ltd ("BMJ") its licensees and where the relevant Journal is co-owned by BMJ to the co-owners of the Journal, to publish the Work in this journal and any other BMJ products and to exploit all rights, as set out in our [licence](#).

The Submitting Author accepts and understands that any supply made under these terms is made by BMJ to the Submitting Author unless you are acting as an employee on behalf of your employer or a postgraduate student of an affiliated institution which is paying any applicable article publishing charge ("APC") for Open Access articles. Where the Submitting Author wishes to make the Work available on an Open Access basis (and intends to pay the relevant APC), the terms of reuse of such Open Access shall be governed by a Creative Commons licence – details of these licences and which [Creative Commons](#) licence will apply to this Work are set out in our licence referred to above.

Other than as permitted in any relevant BMJ Author's Self Archiving Policies, I confirm this Work has not been accepted for publication elsewhere, is not being considered for publication elsewhere and does not duplicate material already published. I confirm all authors consent to publication of this Work and authorise the granting of this licence.

# GUSTATORY AND OLFACTORY DYSFUNCTION IN HOSPITALIZED PATIENTS WITH COVID-19 PNEUMONIA: A PROSPECTIVE STUDY

Alexy Inciarte, MD<sup>1</sup>; Celia Cardozo, MD<sup>1</sup>; Mariana Chumbita, MD<sup>1</sup>, Pau Alcubilla, MD<sup>1</sup>; Berta Torres MD, PhD<sup>1</sup>; Ana González-Cordón, MD, PhD<sup>1</sup>; Verónica Rico, MD<sup>1</sup>; Daiana Agüero, MD<sup>1</sup>; Nicole García-Pouton, MD<sup>1</sup>; Marta Hernández-Meneses, MD<sup>1</sup>; Laia Albiach, MD<sup>1</sup>; Fernanda Meira, MD<sup>1</sup>; Lorena De la Mora, MD<sup>1</sup>; Laura Linares, MD, PhD<sup>1</sup>; Pedro Puerta-Alcalde, MD, PhD<sup>1</sup>; Irene Macaya, MD<sup>1</sup>; Josep Mensa, MD<sup>1</sup>; Montse Laguno, MD, PhD<sup>1</sup>; Juan Ambrosioni, MD, PhD<sup>1</sup>; Angela Ramos, B.N<sup>1</sup>; Laura Morata, MD, PhD<sup>1</sup>; Marta Bodro, MD, PhD<sup>1</sup>; Estela Moreno-García, MD<sup>1</sup>; Antonio Moreno, MD<sup>1</sup>; Montse Solá, B.N<sup>1</sup>; Jhon Rojas, MD, PhD<sup>1</sup>; Lorna Leal, MD, PhD<sup>1</sup>; Manuel Torres, MD<sup>1</sup>; Carolina Garcia-Vidal, MD, PhD<sup>1</sup>; José Antonio Martínez, MD, PhD<sup>1</sup>; Isam Alobid; Alex Soriano, MD, PhD<sup>1</sup>; and Felipe García, MD, PhD<sup>1†</sup>.

**Running title:** Olfactory and gustatory dysfunction in COVID-19 pneumonia.

<sup>1</sup>*Hospital Clínic of Barcelona, Infectious Disease Department, University of Barcelona, Institut d'Investigacions Biomèdiques August Pi I Sunyer (IDIBAPS), Barcelona, Spain*

†Correspondence to: Dr. Felipe García, MD, PhD; Infectious Disease Unit, Hospital Clínic, Villarroel, 170, 08036 Barcelona, Spain. Phone: 34932275586, FAX: 34934514438, E-mail: [fgarcia@clinic.cat](mailto:fgarcia@clinic.cat)

Manuscript word count; 2965.

## ABSTRACT

**Importance:** Identifying undetected clinical signs is imperative in the prevention of SARS-CoV-2.

**Objective:** To establish the prevalence of clinical gustatory and olfactory dysfunction in patients with COVID-19 pneumonia. Clinical outcomes and recovery rates associated with gustatory and olfactory dysfunction were also assessed.

**Design:** A prospective study was performed in 80 patients admitted to Hospital Clínic of Barcelona (Spain) for COVID-19 pneumonia. Patients were reevaluated in the ward daily until discharge. Gustatory and olfactory dysfunction symptoms were retrospectively collected from emergency room (ER) charts after first assessments. Follow-up was performed in telemedicine consultation.

**Setting:** The single-center study was performed in a hospitalization ward at a university hospital.

**Participants:** Consecutive patients meeting hospitalization criteria for COVID-19 pneumonia were eligible. Study exclusion criteria were patients who could not speak, had previous gustatory and olfactory dysfunction or whose PCR tests for SARS-CoV-19 were negative.

**Interventions:** Systematic assessment of gustatory and olfactory symptoms with standardized questions.

**Outcome(s):** Prevalence of gustatory and olfactory dysfunction in patients with COVID-19 pneumonia.

**Results:** Of the 80 study subjects, 62.5% were male and the median age was 57 years. Half of the cohort (n=40) presented with comorbidities. The prevalence of chemosensitive disorder was 73.8%(n=59) [CI-95%,(63.8-83.8)], although self-reported symptoms were recorded in only 26.3%(n=21) of patients in the ER. Gustatory and olfactory dysfunction were observed in

1  
2  
3 58.8%(n=47) and 55%(n=44) of cases, respectively. They were also the first symptoms in  
4  
5 25%(n=20) of patients. Anosmia was associated with ageusia, OR:7(CI-95%,2.3-21.8 p=0.001). No  
6  
7 differences in clinical outcomes were observed when patients with and without gustatory and  
8  
9 olfactory dysfunction were compared. Recovery rates were 20%(n=10) and 85%(n=42) at day 7  
10  
11 and 45, respectively.  
12  
13

14  
15 **Conclusion:** The prevalence of gustatory and olfactory dysfunction in COVID-19 pneumonia was  
16  
17 much higher than in self-report. Presence of gustatory and olfactory dysfunction was not a  
18  
19 predictor of clinical outcomes.  
20  
21  
22  
23  
24  
25  
26  
27  
28  
29  
30  
31  
32  
33  
34  
35  
36  
37  
38  
39  
40  
41  
42  
43  
44  
45  
46  
47  
48  
49  
50  
51  
52  
53  
54  
55  
56  
57

## Article Summary

- Prospective study design in consecutive patients with COVID-19 pneumonia.
- Prospective recovery rates of gustatory and olfactory function in patients with COVID-19 pneumonia.
- Lack of validated questionnaires of olfactory and gustatory function.
- Lack of quantitative assessments of olfactory and gustatory function.
- The selected population primarily represents hospitalized patients, excluding milder cases.



## Introduction

The severe acute respiratory syndrome coronavirus 2 (SARS-CoV-2) has resulted in a pandemic with more than 26 million reported cases and, as last reported in September 2020, 800000 deaths **(1)**. With no effective vaccine available, basic preventive strategies against transmission of the highly contagious virus include the early recognition of potential clinical signs. Such a strategy could minimize the possibility of early transmission, as has been described in several studies **(2-4)**. Similarly, per the latest recommendations of the World Health Organization, establishing contact tracing of suspected cases could provide key clinical findings related to SARS-CoV-2 and mitigate risk of transmission **(5)**. Lastly, prompt diagnosis and treatment of possibly severe viral infection could improve clinical outcomes.

Within this context, gustatory and olfactory dysfunction is an unrecognized and poorly defined condition, for which establishing strong causal relationships is challenging. Viruses, however, are the most frequent pathogens with respect to etiology. For example, *Coronavirus*, *Influenza* and *Picornavirus* have been detected in nasal secretions in smell studies, with various degrees of severity and an even permanent loss of smell and taste **(6)**. Consequently, gustatory and olfactory dysfunction leads to a decrease in the quality of life and mood state **(7)**.

When initial reports of the SARS-CoV-2 outbreak in Wuhan area were published, gustatory and olfactory dysfunction were not described **(8-10)**. However, a small retrospective study performed in Milan estimated a prevalence of gustatory and olfactory dysfunction

1  
2  
3 of around 34% of hospitalized patients with coronavirus disease 2019 (COVID-19) infection  
4  
5 **(11)**. Similarly, several other reports of isolated sudden onset anosmia have recently been  
6  
7 described in patients with COVID-19 **(12,13)**. Finally, a multicenter, cross-sectional study  
8  
9 performed in France and Belgium reported a prevalence of gustatory and olfactory  
10  
11 dysfunction of 85% in mild cases of COVID-19 **(14)**.  
12  
13  
14  
15

16 However, incidence of gustatory and olfactory dysfunction has yet to be defined in severe  
17  
18 cases of COVID-19 requiring hospital admission. Since the onset of the pandemic in  
19  
20 Barcelona, a great number of gustatory and olfactory symptoms have been self-reported  
21  
22 by patients admitted to our health care center for confirmed COVID-19 pneumonia. The  
23  
24 present study aims to estimate the prevalence, clinical traits and evolution of gustatory  
25  
26 and olfactory dysfunction in patients hospitalized for COVID-19 pneumonia.  
27  
28  
29  
30  
31  
32  
33  
34  
35  
36  
37  
38  
39  
40  
41  
42  
43  
44  
45  
46  
47  
48  
49  
50  
51  
52  
53  
54  
55  
56  
57  
58  
59  
60

## **Materials and methods**

### **Study design**

We performed a prospective assessment on patients consecutively admitted to a dedicated ward where attending physicians evaluated gustatory and olfactory dysfunction. After initial evaluations, a retrospective review of ER charts prior to admission was also performed to determine self-report. Negative findings were determined by the absence of the studied symptoms on ER charts, whereas positive findings were determined by the presence of studied symptoms on ER charts. The study was conducted at Hospital Clínic of Barcelona, a tertiary university reference center. The study population comprised patients with COVID-19 pneumonia admitted to a hospitalization ward between February 28<sup>th</sup> and April 24<sup>th</sup>, 2020. Data collection was performed on April 30<sup>th</sup>, 2020.

The main objective of this study was to determine the proportion of gustatory and olfactory dysfunction in hospitalized patients with confirmed COVID-19 pneumonia. Secondary endpoints were to define clinical traits, describe laboratory values, identify factors associated with gustatory and olfactory dysfunction, explore potential differential outcomes between patients with and without gustatory and olfactory dysfunction, and examine time to recovery rates from gustatory and olfactory dysfunction.

### **Patients**

SARS-CoV-2 infection was confirmed by either real-time polymerase chain reaction (PCR) viral detection in a nasopharyngeal swab or by clinical and radiological characteristics set

1  
2  
3 forth by ECDC criteria **(15)**, including: 1) acute respiratory tract infection (sudden onset of  
4 cough, fever and shortness of breath) and 2) severe acute respiratory infection [fever and  
5  
6 at least one sign/symptom of respiratory disease (e.g., cough, fever or shortness breath) ]  
7  
8 requiring hospitalization with unilateral or bilateral interstitial infiltrate in the chest X-ray.  
9  
10 This clinical definition was set on March 15<sup>th</sup>, 2020, when the percentage of  
11  
12 microbiologically-confirmed cases of COVID-19 from all collected samples was higher than  
13  
14 70%. Patients with prior dysfunction, unable to speak, with mental impairment or who  
15  
16 tested negative for SARS-CoV-2 were excluded from the analysis. Additionally, to avoid  
17  
18 memory bias, patients with direct admission to the intensive care unit (ICU) or posterior  
19  
20 discharge to the ward were excluded. Inclusion of consecutive patients from the same  
21  
22 ward was established to avoid selection bias.  
23  
24  
25  
26  
27  
28

### 30 **Data Collection**

31  
32  
33 Directed anamnesis was performed in each patient upon arrival to the ward, including  
34  
35 baseline characteristics, demographics and classic pneumonia signs. Patients were asked  
36  
37 about gustatory and olfactory dysfunction symptoms, such as ageusia, dysgeusia, anosmia  
38  
39 and hyposmia on a daily basis until discharge. The following questions were asked  
40  
41 systematically to all patients: 1) have you noticed any sudden and recent changes in smell  
42  
43 and taste?; 2) If the response was affirmative, was this the first symptom?; 3) is there a  
44  
45 total loss of taste and smell; 4) is there a partial loss of taste and smell?; 5) have the  
46  
47 symptoms disappeared?; and, 6) when did the symptoms disappear? Gustatory and  
48  
49 olfactory dysfunction were reevaluated during telemedicine consultations on a weekly  
50  
51 basis after discharge. The following questions were then asked systematically to all  
52  
53  
54  
55  
56  
57

1  
2  
3 discharged patients: 1) was there resolution of symptoms?; 2) was there partial or total  
4  
5 recovery?; and, 3) when did symptoms resolve? Additional laboratory tests (liver enzymes,  
6  
7 creatinine, C-reactive protein, leukocyte count, CD4, CD8 and CD3 count, ferritin and D-  
8  
9 dimer levels, and procalcitonin) were performed in all patients. The last follow-up date  
10  
11 was April 24<sup>th</sup>, 2020.  
12  
13

14  
15 For data collection, variables were extracted from electronic health records in the SAP 740  
16  
17 Hospital Information System© (Societas Europaea, Walldorf, Germany). The results  
18  
19 obtained were included in a database created with MICROSOFT EXCEL© for later analysis  
20  
21 with statistical package SPSS v18.0© (IBM corporation, Armonk, New York, USA).  
22  
23  
24

### 25 **Statistical analysis**

26  
27 The primary endpoint of the study was to determine the proportion of patients with  
28  
29 gustatory and olfactory dysfunction, reflected in percentages with a confidence level of  
30  
31 95%. The Fisher's exact test was performed to analyze categorical variables between  
32  
33 groups; significant p values were shown in odds ratios and confidence intervals. The  
34  
35 significance level was set at a p-value <0.05. Inferential analysis of continuous variables,  
36  
37 such as laboratory values, was performed using parametric tests (Student's t-test);  
38  
39 Pearson test was performed to correlate the duration of symptoms and inflammatory  
40  
41 markers. Missing data was reduced by the use of an operator manual at the start of the  
42  
43 study and careful data collection. Missing data was managed with the listwise approach.  
44  
45  
46  
47  
48

### 49 **Sample size calculation**

1  
2  
3 An estimated sample size of 80 patients would allow for an expected prevalence of 33% at  
4  
5 a 10.5% accuracy rate and 95% confidence interval, as has been shown in a prior study by  
6  
7  
8 Giacomelli *et al.* (11)  
9

### 10 11 12 13 14 15 **Ethics**

16  
17 The hospital's research ethics committee and competent Spanish authorities approved the  
18  
19 protocol describing the project proposed by the researcher (approval number  
20  
21 HCB/2020/0458). Processing, reporting and transfer of personal data for all participating  
22  
23 subjects complied with provisions in Organic Act 15/1999 of December 13<sup>th</sup> (Spanish Royal  
24  
25 Decree 1720/2007 of December 21<sup>st</sup>) and in current Regulation EU 2016/679 of the  
26  
27 European Parliament and the European Council on April 27<sup>th</sup>, 2016, being mandatory after  
28  
29 May 25<sup>th</sup>, 2018, on the Protection of Personal Data and guarantee of digital rights. The  
30  
31 patients either signed written consent or when not possible, due to the pandemic and  
32  
33 isolation measures in place, provided oral consent. In such cases, oral consent was  
34  
35 recorded in Electronic Clinical Documentation.  
36  
37  
38  
39  
40

41  
42 **Patient and public involvement:** The patients were not involved in the study described.  
43  
44  
45  
46  
47  
48  
49  
50  
51  
52  
53  
54  
55  
56  
57

## **Results**

### **Baseline characteristics**

Of the 1738 patients with COVID-19 admitted to the hospital between February 28<sup>th</sup> and April 24<sup>th</sup>, 1371 were placed in several hospitalization wards and 337 in the intensive care unit (ICU). Analysis of gustatory and olfactory dysfunction was prospectively performed in 80 patients [Figure 1 flow chart]. The median (IQR) age was 57 (43-70) years and 62.5 % were males. Eleven (14%) patients were health care workers. Continent origin of patients comprised 71% (n=57) European primarily, and 25% (n=20) Latin American. Comorbidities were present in 50% (n=40) of patients. The median (IQR) time from symptom onset to hospital admission was 8 (5-10) days, and the median (IQR) length of stay (LOS) was 8 (5-12.5) days [Table 1].

### **Gustatory and olfactory dysfunction**

The main clinical symptoms reported by patients are depicted in Table 1. The prevalence of gustatory and olfactory dysfunction was found to be 73.8 % (n=59) [95 % (CI 63.8% to 83.8 %)] in this sample. Separately, gustatory and olfactory dysfunction was present in 58.8% (n=47) and 55% (n=44) of cases, respectively. Anosmia was the most frequent symptom present in 46.3% (n=37) of cases, followed by dysgeusia in 41.3 % (n=33), ageusia in 28.3% (n=23) and hyposmia in 15% (n=12). In 21% (n=7) of cases of dysgeusia, patients reported a salty taste. There was an association between ageusia and anosmia, OR: 7 [IC: 95 2.26 to 21.8 p= 0.001]. Gustatory and olfactory dysfunction was the first symptom to appear in 25% (n=20) of cases. Only one case presented with gustatory and olfactory dysfunction a7 days after admission; the remaining patients presented with

1  
2  
3 gustatory and olfactory symptoms prior to hospital admission. In the ER, only 26.3 %  
4  
5 (n=21) of patients reported olfactory-gustatory dysfunction. ER physicians were more  
6  
7 likely to report positive than negative clinical findings (90.5% vs. 9.5%, respectively), OR:  
8  
9 4.6 [0.97-21.95 IC: 95 p= 0.039]. Among classic pneumonia symptoms, fever was present  
10  
11 in 89% (n=71) of patients. It was also the most frequent consulted symptom in 53.8%  
12  
13 (n=43) of patients who visited the ER. The second most common symptom was coughing,  
14  
15 being present in 77.5% (n=62) of cases, followed by dyspnea in 58.8% (47%), asthenia in  
16  
17 56.3% (n=45), myalgia in 50% (n=40), hyporexia in 38% (n=33), vomiting in 8.8 % (n=7) and  
18  
19 skin lesions in 6.3% (n=5) [Figure 2]. Vomiting and skin lesions were uncommon.  
20  
21 Furthermore, hyporexia was associated with gustative dysfunction, OR: 4.1 [1.23 to 13.67  
22  
23 IC: 95 p= 0.016]. An association between cough and the presence of gustatory and  
24  
25 olfactory dysfunction was also observed, OR: 1.2 [0.12 to 12.86 IC: 95, p= 0.046] [Table 1].  
26  
27  
28  
29  
30  
31

32  
33 Per laboratory abnormalities, C-reactive protein (CRP) values were elevated upon  
34  
35 admission in 91.8% of cases; lymphopenia was present in 98.8% of cases. Other common  
36  
37 findings included elevated levels of lactate dehydrogenase (76.2% of cases), D-dimer  
38  
39 (66.2%) and serum ferritin (63.2%) [Table 2].  
40  
41  
42  
43

44 Differences between AST and ALT values were observed between patients with gustatory-  
45  
46 olfactory dysfunction and those without symptoms [(33 vs. 61 UI/l) p=0.019 and (28 vs.  
47  
48 49) p= 0.003, respectively]. No differences in other laboratory findings were found  
49  
50  
51 between the studied groups [Table 2].  
52  
53  
54  
55  
56  
57



### **Treatment prescribed**

All patients received hydroxychloroquine and azithromycin. In approximately 91.3 % (n=73) of patients, lopinavir boosted with ritonavir was administered; 38.8% (n=31), interleukin blockers; and 30.4% (n=24), corticosteroids. In 18.8% (n=15) of patients, teicoplanin was administered, whereas in 7.6% (n=6) of patients, interferon was administered. Oxygen supplementation and intubation were required in 69.8% (n=55) and 10% (5%) of patients, respectively. No differences were observed between study groups [Table 3].

### **Clinical outcomes**

A total of 90% (n=73) of patients were discharged upon completion of the study period and 13.8% (n=11) required ICU admission during hospitalization, of whom none died. After discharge, 87% (n=67) of patients were followed up via a telemedicine consultation for any possible changes in status. No readmission episodes were recorded.

In terms of ICU admission, LOS, SpO<sub>2</sub>/FiO<sub>2</sub> ratio, oxygen supplementation, respiratory distress or organizing pneumonia. No association was observed in outcomes between patients with gustatory and olfactory dysfunction and patients without gustatory and olfactory dysfunction. Pulmonary embolism was associated with the absence of gustatory and olfactory dysfunction (21% vs 0) p=0.0001 [Table 3].

### **Gustatory and olfactory outcomes**

Of the 59 patients with gustatory and olfactory dysfunction, 50 were reassessed for follow-up. At day 7 after discharge, 20% (n=10) of these patients had recovered gustatory

1  
2  
3 and olfactory function. Recovery rates at day 14, 30 and 45 were 28% (n=14), 56% (n=28)  
4  
5 and 84% (n=42), respectively. The median time of olfactory-gustatory recovery was 14 (7-  
6  
7 30) days [Figure 3].  
8  
9

10  
11 Time of olfactory-gustatory recovery was positively correlated with age (r: 0.48 p= 0.03)  
12  
13 and ferritin levels (r: 0.353 p=0.037). No correlations with severity of respiratory function  
14  
15 or any other abnormal laboratory values were found.  
16  
17

## 18 19 Discussion

20  
21  
22 This is a prospective study evaluating the prevalence of gustatory and olfactory  
23  
24 dysfunction in hospitalized patients. We found a prevalence of 74% in all patients  
25  
26 admitted to a hospital ward with COVID-19 pneumonia who could be questioned. In a  
27  
28 previous study in hospitalized patients, overall prevalence was reported at 33% **(11)**. The  
29  
30 main reasons for this discrepancy could be attributed to the retrospective design of that  
31  
32 study and an unidentified prevalence of gustatory and olfactory dysfunction of 53% in this  
33  
34 prospective cohort due to reassessment of ER electronic health records in hospitalization  
35  
36 wards. In fact, brief communication reports in Italy have already acknowledged a self-  
37  
38 reported prevalence of gustatory and olfactory dysfunction of 19 % in retrospective charts  
39  
40  
41  
42  
43  
44 **(16)**.

45  
46  
47 In our cohort, gustatory and olfactory dysfunction syndrome was almost as prevalent as  
48  
49 fever and cough, two classic symptoms of viral pneumonia. Within the context of flu-like  
50  
51 symptoms and gustatory-olfactory dysfunction syndrome, the possibility of COVID-19  
52  
53 infection is worth considering. In a recent case-control study, gustatory and olfactory  
54  
55  
56  
57

1  
2  
3 dysfunction were 10 times more common in patients with positive PCR testing results  
4  
5 than in those who tested negative for the COVID-19 infection **(17)**.  
6  
7

8  
9 Our study reported anosmia in 55% of cases, whereas investigators Lechein *et al.* reported  
10  
11 anosmia in 86% of cases within the setting of a symptom-oriented, otorhinolaryngology-  
12  
13 specialized consultation. Patients in that study were younger, without comorbidities and  
14  
15 primarily health care providers, contrasting our older cohort of hospitalized patients who  
16  
17 presented with more comorbidities. Similarly, with results being obtained by quantitative  
18  
19 testing of sense of smell, an Iranian case-control study reported olfactory changes in  
20  
21 nearly 98% of patients with COVID-19 and a median age of 46 years. This study suggests  
22  
23 that quantitative testing of hyposmia might serve as a rapid, alternative diagnostic  
24  
25 approach for SARS-CoV-2 screening **(18)**. However, the role of this test in older patients  
26  
27 remains unclear given age-related changes that occur in olfactory function **(19)**.  
28  
29  
30  
31  
32

33  
34 Similar clinical signs and symptoms were observed between patients with and without  
35  
36 gustatory and olfactory dysfunction. Coughing was observed more frequently in patients  
37  
38 with gustatory and olfactory dysfunction, whereas a more severe respiratory syndrome  
39  
40 was not. Gustatory dysfunction was associated with hyporexia, which could affect a  
41  
42 patient's quality of life and daily activities especially in cases of persistence **(20-21)**.  
43  
44  
45

46  
47 Additionally, no major alterations in laboratory values were observed. A mild-to-moderate  
48  
49 elevation of liver enzymes were common in the absence of gustatory and olfactory  
50  
51 dysfunction symptoms; no case of acute liver failure was reported. Although an  
52  
53 explanation for these findings is difficult to provide, this observation may be due to  
54  
55  
56  
57

1  
2  
3 inflammatory changes in the liver or in relation to a different tissue expression of  
4 receptors and entry molecules. ACE2 and TMPRSS2 are expressed in cells from multiple  
5  
6 tissues, including olfactory cells and liver; the degree to which tropism might affect  
7  
8 different tissues has not been well established **(22)**.  
9  
10  
11

12  
13  
14 Clinical outcomes were similar in both groups, however pulmonary embolism occurs in  
15  
16 20% of patients without gustatory and olfactory dysfunction symptoms. Confounding  
17  
18 factors associated with pulmonary embolism such as thromboprophylaxis could not be  
19  
20 excluded **(23)**, and there is some debate as to whether or not the presence of  
21  
22 chemosensory disorder is related to a better prognosis. In some studies, the absence of  
23  
24 anosmia was associated with a mild-to-moderate COVID-19 infection and outpatient care  
25  
26 **(24)**. Other studies have concluded that there is no prognostic value; however, the  
27  
28 persistence of olfactory dysfunction at day 20 is associated with a more severe disease  
29  
30 course **(25)**. Disparity of these findings might be explained by bias, e.g., severe and  
31  
32 critically ill patients who are vulnerable to self-neglect and by consequence, do not  
33  
34 recognize chemosensory loss and older patients failing to recognize an acute  
35  
36 chemosensory loss due to a prior, unidentified olfactory impairment related to  
37  
38 senescence. Investigators Lechein *et al.* reported recovery rates of olfactory function at  
39  
40 72% on day 8. Since our study represented olfactory and gustatory outcomes together,  
41  
42 performing comparisons might be difficult; nonetheless, we found recovery rates of 20%  
43  
44 on day 7 and 84% on day 45. Lastly, another possibility for this discrepancy is the older age  
45  
46 and more severe clinical manifestations of COVID-19 infection in our cohort.  
47  
48  
49  
50  
51  
52  
53  
54  
55  
56  
57

1  
2  
3 Although no correlation between etiopathogenic factors and the length of gustatory and  
4  
5 olfactory function recovery has been made thus far, the inflammatory response might play  
6  
7 a role. Our data supports that higher levels of ferritin and older age are associated with  
8  
9 longer recovery rates. Ferritin levels have been reported to be markedly higher in severe  
10  
11 cases than in moderate cases of COVID-19 with longer recovery rates; older age was  
12  
13 associated with higher disease severity (26-28).  
14  
15  
16  
17

### 18 **Strengths and weaknesses of the study**

19  
20  
21 The main limitation of this study was the lack of validated olfactory and gustatory  
22  
23 questionnaires based on smell and taste components, which could have provided an even  
24  
25 more standardized approach. Another limitation was the impossibility to perform  
26  
27 olfactory-gustatory testing using quantitative measurements and to include accepted  
28  
29 retronasal olfaction test methods. In spite of this, a standardized, non-validated  
30  
31 questionnaire was implemented and used systematically in all patients. Consecutive  
32  
33 patients were included in this study to minimize selection bias, although selection could  
34  
35 be a cause of bias in our data.  
36  
37  
38  
39  
40  
41

42 The study population selected is limited, representing hospitalized patients mostly and  
43  
44 excluding milder cases without pulmonary involvement and the most critical cases with  
45  
46 direct ICU admission. Moreover, not all of the patients had microbiologically-confirmed  
47  
48 cases of infection or underwent complete follow-up after hospital discharge.  
49  
50  
51  
52  
53  
54  
55  
56  
57

### Conclusions and policy implications

There is high prevalence of gustatory and olfactory dysfunction in hospitalized patients with COVID-19 pneumonia. Self-reporting rates are low in our population. To improve surveillance in this pandemic, it is strongly suggested to redefine case definitions for COVID-19 in international guidelines.

For peer review only

1  
2  
3 **Acknowledgements:** HIV Unit: Jose-luis Blanco, Maria Martinez-rebollar, Esteban Martinez, Josep  
4  
5 Mallolas, Pilar Callau. All the personnel of Medical Intensive Care Unit: Josep Maria Nicolás, Pedro  
6  
7 Castro, Sara Fernández and Adrian Téllez. Department of International Health: Alex Almuedo-  
8  
9 Riera, Jose Muñoz, Daniel Camprubi Ferrer, Maria Teresa de Alba, Marc Fernandez, Elisabet Ferrer,  
10  
11 Berta Grau, Helena Marti, Magdalena Muelas, Maria Jesus Pinazo, Natalia Rodríguez, Montserrat  
12  
13 Roldan, Carme Subira, Isabel Vera, Nana Williams.  
14  
15

16  
17 We would also like to thank Anthony Armenta for providing medical editing assistance in English.  
18  
19

20 **Financial disclosure:** No funding to be disclosed. All the authors are independent from the funding  
21  
22 organization.  
23  
24

25 **Contributorship statement :** AI, CC, MC, PA,BT, AGC, VR, DA, NGP, MHM, LA, JR, FM, LDL, LL, PPA,  
26  
27 IM, ML, JA, AR, LM, MB, EMG, AM, MS , performed clinical assessments. AI and FG designed the  
28  
29 study, contributed to data analysis and wrote the first draft of the manuscript. AI, CC, MC, LL, MT  
30  
31 were responsible for data entry. AI, CGV, JAM, IA, AS, LM, EG, VDB, CL, JGP, FG, critically reviewed  
32  
33 the manuscript and agreed on its final version.  
34  
35  
36

37 **Transparency statement:** All the information displayed in the present manuscript is an honest,  
38  
39 accurate, and transparent account of the study being reported; that no important aspects of the  
40  
41 study have been omitted; and that any discrepancies from the study as originally planned (and, if  
42  
43 relevant, registered) have been explained.  
44  
45  
46

47 **Data sharing statement:** Extra data will be available by emailing [ajinciar@clinic.cat](mailto:ajinciar@clinic.cat)  
48  
49

50 **Patient and public involvement:** Patients were not involved in the study described; there will be  
51  
52 an enlisting of patients to disseminate the research findings to the general population in primary  
53  
54 care settings.  
55  
56

**Table 1. Baseline characteristics according to the presence of gustatory and olfactory dysfunction in patients with COVID-19 pneumonia.**

| Variable                              | Cohort      | GOD        | Absence of GOD | p Value      |
|---------------------------------------|-------------|------------|----------------|--------------|
| N                                     | 80          | 59         | 21             |              |
| Median (IQR) Age                      | 57 (42-70)  | 58 (44-69) | 55 (38-72)     | 0.782        |
| Male, n (%)                           | 50 (63)     | 34 (59)    | 15 (71)        | 0.325        |
| RT-PCR (+) nasopharyngeal swab, n (%) | 73 (91.2)   | 55 (93)    | 19 (86)        | 0.985        |
| European, n (%)                       | 57 (71)     | 37 (64)    | 14 (67)        | 0.940        |
| Co-existing illness, n (%)            | 40 (50)     | 27 (47)    | 12 (57)        | 0.370        |
| Hypertension, n (%)                   | 22 (29)     | 17 (29)    | 5 (23)         | 0.738        |
| Diabetes, n (%)                       | 8 (10)      | 6 (10)     | 2 (10)         | 0.932        |
| Pulmonary disease, n (%)              | 8 (10)      | 7 (14)     | 1 (5)          | 0.168        |
| Oncological disease, n (%)            | 5 (6)       | 2 (3)      | 3 (14)         | 0.76         |
| Heart disease, n (%)                  | 5(6)        | 3 (5)      | 2 (11)         | 0.453        |
| Health care worker, n (%)             | 11(14)      | 3 (14)     | 3 (14)         | 0,934        |
| Median (IQR) days from onset to ER    | 8 (5.25-10) | 8 (5-11)   | 7 (5.5-9)      | 0.135        |
| Fever, n (%)                          | 71 (89)     | 52 (88)    | 19 (91)        | 0.771        |
| Cough, n (%)                          | 62 (78)     | 49 (83)    | 13(62)         | <b>0.046</b> |
| Shortness of breath, n (%)            | 52 (65)     | 35 (59)    | 17 (81)        | 0.074        |
| Asthenia, n (%)                       | 45 (56)     | 33 (56)    | 12 (57)        | 0.934        |
| Myalgia, n (%)                        | 40 (50)     | 34 (53)    | 9 (43)         | 0.147        |
| Diarrhea, n (%)                       | 35 (44)     | 25 (42)    | 10 (48)        | 0.677        |
| Hyporexia, n (%)                      | 33(38)      | 29 (49)    | 4 (19)         | <b>0.016</b> |
| Headache, n (%)                       | 28 (35)     | 24 (41)    | 4 (19)         | 0.061        |
| Arthralgia, n (%)                     | 10(13)      | 8(14)      | 2 (10)         | 0.545        |
| Chest Pain, n (%)                     | 9 (11)      | 6 (10)     | 3 (14)         | 0.608        |
| Odynophagia n, (%)                    | 7 (9)       | 6 (10)     | 1 (5)          | 0.451        |
| Vomiting, n (%)                       | 7 (9)       | 6 (10)     | 1 (5)          | 0.451        |
| Rash, n (%)                           | 5 (6)       | 5 (9)      | 0              | 0.168        |
| Rhinorrhea                            | 2 (3)       | 1 (2)      | 1 (5)          | -            |

IQR: interquartile range. GOD, Gustatory and olfactory dysfunction.



**Table 2. Laboratory values according to the presence of gustatory and olfactory dysfunction in patients with COVID-19 pneumonia.**

| Variable                                       | Cohort         | GOD               | Absence of GOD  | p Value      |
|------------------------------------------------|----------------|-------------------|-----------------|--------------|
| <b>N</b>                                       | 80             | 59                | 21              |              |
| CRP mg/dL [ $< 1.0$ ]                          | 9 (3-14)       | 8 (3-16)          | 10 (5-13)       | 0.838        |
| LDH mg/dL [ $< 234$ ]                          | 310 (268-386)  | 309 (250-367)     | 342 (260-453)   | 0.109        |
| Ferritin mg/dL [ $< 200$ ]                     | 716 (256-1322) | 592 (241-1255)    | 1066 (300-1552) | 0.093        |
| AST UI/L<br>[5.0 - 40.0]                       | 39 (25-61)     | 33 (22-50)        | 61 (39-94)      | <b>0.003</b> |
| ALT UI/L<br>[5.0 - 40.0]                       | 29 (20-68)     | 28 (19-55)        | 49 (27-102)     | <b>0.019</b> |
| BT mg/dL<br>[0.20 - 1.20]                      | 0.64 (0.8-0.4) | 0.6 (0.4-0.75)    | 0.8 (0.55-1.05) | 0.560        |
| LYM cells/mm <sup>3</sup><br>[4.00 - 11.00]    | 0.9 (0.6-1.3)  | 0.9 (0.6- 1.3)    | 0.8 (0.6-1.5)   | 0.820        |
| D-dimer ng/ml [ $< 500$ ]                      | 800 (400-1200) | 700 (400-1100)    | 1000 (600-1800) | 0.251        |
| Platelets cells/mm <sup>3</sup><br>[130 - 400] | 212 (168-266)  | 213(170-265)      | 209 (150-281)   | 0.735        |
| Creatinine mg/dL<br>[0.30 - 1.30]              | 0.6 (0.7-0.9)  | 0.78 (0.63-0.91)  | 0.86 (68-0.98)  | 0.630        |
| Calcium meq/l[8.5<br>– 9.5]                    | 8.2 (8-8.5)    | 8.2 (8-8.6)       | 8.1 (7.8 --8.3) | 0.735        |
| CD4 Cels/ $\mu$ L [530 -<br>1300]              | 356 (248-579)  | 358.5 (258.7-630) | 328 (225-464)   | 0.414        |
| CD8 Cels/ $\mu$ L [330 -<br>920]               | 225 (147-353)  | 241 (148 -256)    | 186 (140.7-396) | 0.934        |
| CD3 Cels/ $\mu$ L [1000<br>- 2200]             | 630 (404-1014) | 676 (459.5-1035)  | 496 (386-792)   | 0.310        |

CRP, C-reactive protein; LDH, Lactate dehydrogenase; AST, Aspartate aminotransferase ; ALT, Alanine transferase; BT, total bilirubin; LYM, Lymphocyte; NEU, Neutrophil; CD4, CD4+ count; CD8, CD8+ count; GOD, Gustatory and olfactory dysfunction.

**Table 3. Clinical outcomes according to the presence of gustatory and olfactory dysfunction in patients with COVID-19 pneumonia.**

| Variable                                       | Cohort        | GOD           | Absence of GOD | p Value |
|------------------------------------------------|---------------|---------------|----------------|---------|
| N                                              | 80            | 59            | 21             |         |
| LOS (IQR)                                      | 8 (4-11.75)   | 8 (4.2-11)    | 7 (4-14)       | 0.836   |
| SpO <sub>2</sub> /fiO <sub>2</sub> ratio (IQR) | 448 (245-247) | 451 (257-471) | 391 (197-471)  | 0.346   |
| Lopinavir/ritonavir, n (%)                     | 73 (94)       | 52 (91)       | 21 (100)       | 0.161   |
| Interferon, n (%)                              | 6 (8)         | 4 (7)         | 2 (10)         | 0.638   |
| Corticosteroid, n (%)                          | 24 (30)       | 15 (3)        | 9 (43)         | 0.147   |
| Interleukin blocker, n (%)                     | 33 (41)       | 22 (37)       | 11 (52)        | 0.228   |
| ICU admission, n (%)                           | 11 (14)       | 7 (12)        | 4 (19)         | 0.412   |
| Complication n, (%)                            | 32 (41)       | 20 (35)       | 12 (57)        | 0.07    |
| Oxygen requirement, n (%)                      | 55 (69)       | 40 (68)       | 15 (71)        | 0.758   |
| Orotraqueal intubation, n (%)                  | 8             | 5 (8.5)       | 3 (14)         | 0.867   |
| Respiratory distress, n (%)                    | 31            | 20 (34)       | 11 (52)        | 0.135   |
| Pulmonary embolism, n (%)                      | 5 (6)         | 0             | 5 (23)         | 0.0001  |
| Organizing pneumonia, n (%)                    | 10 (13)       | 5 (9)         | 5 (24)         | 0.068   |

LOS, length of stay; SpO<sub>2</sub>, peripheral capillary oxygen saturation; FiO<sub>2</sub>, Fraction of Inspired Oxygen; IQR, Interquartile range; GOD, Gustatory and olfactory dysfunction.

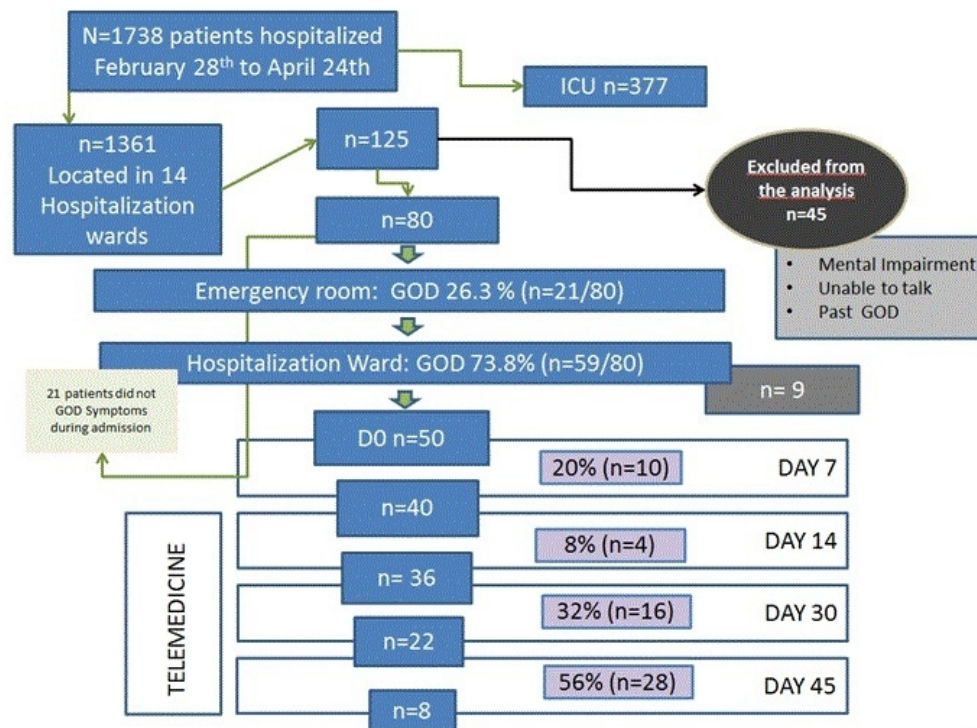

Figure 1. Study Flow Chart. Day 0: If the patient meets criteria is included in the study. Blue boxes represent individuals on follow-up with gustatory-olfactory dysfunction, lilac boxes represents individuals in which the recovery event develops. Gray boxes represent individuals lost to follow up. White boxes represent timelines and mode of follow-up.

58x45mm (300 x 300 DPI)

Figure 2. General symptoms in patients with COVID-19 pneumonia in absolute numbers (n=80)

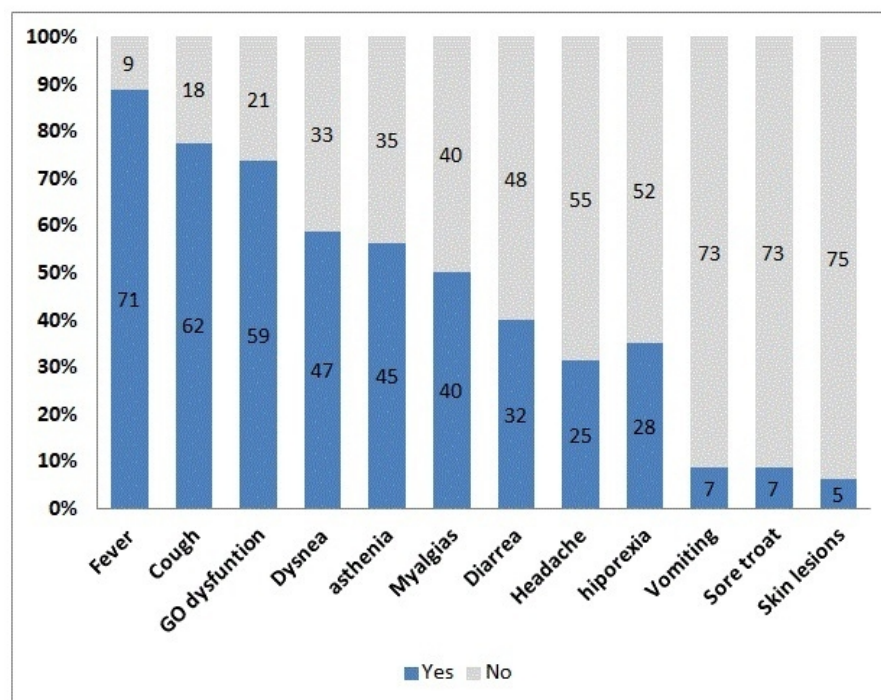

GOD: gustatory and olfactory dysfunction

58x45mm (300 x 300 DPI)

1  
2  
3  
4  
5  
6  
7  
8  
9  
10  
11  
12  
13  
14  
15  
16  
17  
18  
19  
20  
21  
22  
23  
24  
25  
26  
27  
28  
29  
30  
31  
32  
33  
34  
35  
36  
37  
38  
39  
40  
41  
42  
43  
44  
45  
46  
47  
48  
49  
50  
51  
52  
53  
54  
55  
56  
57  
58  
59  
60

Figure 3. Recovery rates of gustatory-olfactory dysfunction trough time at follow up post – discharge n=50

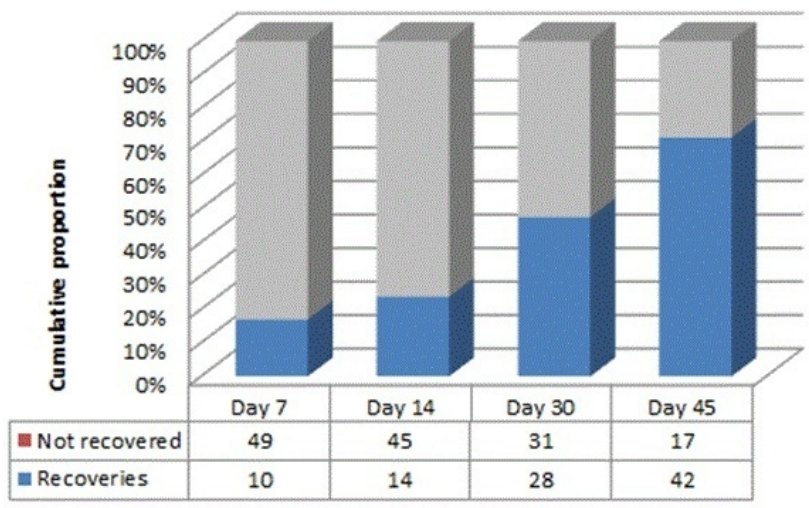

59x37mm (300 x 300 DPI)

|    |
|----|
| 1  |
| 2  |
| 3  |
| 4  |
| 5  |
| 6  |
| 7  |
| 8  |
| 9  |
| 10 |
| 11 |
| 12 |
| 13 |
| 14 |
| 15 |
| 16 |
| 17 |
| 18 |
| 19 |
| 20 |
| 21 |
| 22 |
| 23 |
| 24 |
| 25 |
| 26 |
| 27 |
| 28 |
| 29 |
| 30 |
| 31 |
| 32 |
| 33 |
| 34 |
| 35 |
| 36 |
| 37 |
| 38 |
| 39 |
| 40 |
| 41 |
| 42 |
| 43 |
| 44 |
| 45 |
| 46 |
| 47 |
| 48 |
| 49 |
| 50 |
| 51 |
| 52 |
| 53 |
| 54 |
| 55 |
| 56 |
| 57 |
| 58 |
| 59 |
| 60 |

|                                                                                                                                                                                                                                                                                                                                                                                             |
|---------------------------------------------------------------------------------------------------------------------------------------------------------------------------------------------------------------------------------------------------------------------------------------------------------------------------------------------------------------------------------------------|
| <b>Section 1: What is already known on this topic?</b>                                                                                                                                                                                                                                                                                                                                      |
| <ul style="list-style-type: none"><li>• Self reported prevalence in Pneumonia population.</li><li>• Prevalence in cross-sectional studies in mild disease forms in specific groups (health care workers) and specific consultation (ENT consultations)</li><li>• One study retrospective study of recovery rates in pauci symptomatic patients.</li></ul>                                   |
| <b>Section 2: What this study adds?</b>                                                                                                                                                                                                                                                                                                                                                     |
| <ul style="list-style-type: none"><li>• Prevalence of gustatory and olfactory symptoms in COVID-19 pneumonia population.</li><li>• Prospective recovery rates in a more severe disease group (COVID-19 pneumonia patients)</li><li>• Our study suggest there is no association between severity outcomes of patients with gustatory and olfactory dysfunction and those who don't</li></ul> |
| <b>Implication:</b> Support a more generalized consensus of gustatory and olfactory symptoms in case definition of COVID-19 in international organizations.                                                                                                                                                                                                                                 |

## References

1. COVID-19 Coronavirus Pandemic. Last updated: September 5, 2020, 15:33 GMT  
<https://www.worldometers.info/coronavirus/> Accessed September 5, 2020.
2. Nishiura H, Kobayashi T, Suzuki A, et al. **Estimation of the asymptomatic ratio of novel coronavirus infections (COVID-19)** [published online ahead of print, 2020 Mar 13]. *Int J Infect Dis.* 2020;S1201-9712(20)30139-9. doi:10.1016/j.ijid.2020.03.020.
3. Bai Y, Yao L, Wei T, et al. **Presumed Asymptomatic Carrier Transmission of COVID-19** [published online ahead of print, 2020 Feb 21]. *JAMA.* 2020;323(14):1406–1407. doi:10.1001/jama.2020.2565
4. Zhang J, Tian S, Lou J, **Chen Y. Familial cluster of COVID-19 infection from an asymptomatic.** *Crit Care.* 2020;24(1):119. Published 2020 Mar 27. doi:10.1186/s13054-020-2817-7
- 5.- **WHO. COVID-19: Operational guidance for maintaining essential health services during an outbreak.** <https://www.who.int/publications-detail/covid-19-operational-guidance-for-maintaining-essential-health-services-during-an-outbreak>. Accessed April 30, 2020.
6. Suzuki M1, Saito K, Murakami S et al. **Identification of viruses in patients with postviral olfactory dysfunction.** *Laryngoscope.* 2007 Feb;117(2):272-7.
7. Smeets M, Veldhuizen M, Galle S, et al. **Sense of smell disorder and health-related quality of life.** *Rehabil Psychol.* 2009;54:404–412.
8. Wang Z, Yang B, Li Q, Wen L, Zhang R. **Clinical Features of 69 Cases with Coronavirus Disease 2019 in Wuhan, China.** *Clin Infect Dis.* 2020; pii: ciaa272. doi: 10.1093/cid/ciaa272
9. Huang C, Wang Y, Li X, et al. **Clinical features of patients infected with 2019 novel coronavirus in Wuhan, China** [published correction appears in *Lancet.* 2020 Jan 30;:]. *Lancet,* 2020 ; 395(10223):497–506.



- 1  
2  
3 10.- The Novel Coronavirus Pneumonia Emergency Response Epidemiology Team. **The**  
4 **Epidemiological Characteristics of an Outbreak of 2019 Novel Coronavirus Diseases (COVID-19)**  
5 **China, 2020.** China CDC Weekly, 2020 ; 2:113-22.  
6  
7  
8  
9  
10  
11 11. Giacomelli A, Pezzati L, Galli M et al **Self-reported olfactory and taste disorders in SARS-CoV-2**  
12 **patients: a cross-sectional study.** Clinical Infectious Disease. 2020 Mar 26. pii: ciaa330. doi:  
13 10.1093/cid/ciaa330.  
14  
15  
16  
17  
18 12. Ollarves-Carrero MF, Rodriguez-Morales AG, Bonilla-Aldana DK, Rodriguez-Morales AJ.  
19 **Anosmia in a healthcare worker with COVID-19 in Madrid, Spain** [published online ahead of  
20 print, 2020 Apr 13]. Travel Med Infect Dis. 2020;101666. doi:10.1016/j.tmaid.2020.101666  
21  
22  
23  
24  
25  
26 13. Gane SB, Kelly C, Hopkins C. **Isolated sudden onset anosmia in COVID-19 infection. A novel**  
27 **syndrome?** [published online ahead of print, 2020 Apr 2]. Rhinology. 2020;10.4193/Rhin20.114.  
28 doi:10.4193/Rhin20.114  
29  
30  
31  
32  
33 14. Lechien JR, Chiesa-Estomba CM, De Siati DR, et al. **Olfactory and gustatory dysfunctions as a**  
34 **clinical presentation of mild-to-moderate forms of the coronavirus disease (COVID-19): a**  
35 **multicenter European study** [, 2020 Apr 6]. Eur Arch Otorhinolaryngol. 2020;10.1007/s00405-020-  
36 05965-1. doi:10.1007/s00405-020-05965-1  
37  
38  
39  
40  
41  
42  
43 15. **Case definition and European surveillance for COVID-19, as of 2 March 2020.**  
44 [https://www.ecdc.europa.eu/en/case-definition-and-european-surveillance-human-infection-](https://www.ecdc.europa.eu/en/case-definition-and-european-surveillance-human-infection-novel-coronavirus-2019-ncov)  
45 [novel-coronavirus-2019-ncov](https://www.ecdc.europa.eu/en/case-definition-and-european-surveillance-human-infection-novel-coronavirus-2019-ncov). Accessed April 30, 2020.  
46  
47  
48  
49  
50  
51 16. Vaira LA, Salzano G, Deiana G, De Riu G. **Anosmia and Ageusia: Common Findings in COVID-19**  
52 **Patients** [, 2020 Apr 1]. Laryngoscope. 2020;10.1002/lary.28692. doi:10.1002/lary.28692  
53  
54  
55  
56  
57  
58  
59  
60



- 1  
2  
3 17. Yan CH, Faraji F, Prajapati DP, Boone CE, DeConde AS. Association **of chemosensory**  
4 **dysfunction and Covid-19 in patients presenting with influenza-like symptoms** [, 2020 Apr 12]. Int  
5 **dysfunction and Covid-19 in patients presenting with influenza-like symptoms** [, 2020 Apr 12]. Int  
6 Forum Allergy Rhinol. 2020;10.1002/alr.22579. doi:10.1002/alr.22579  
7  
8  
9  
10 18. Moein ST, Hashemian SMR, Mansourafshar B, Khorram-Tousi A, Tabarsi P, Doty RL. **Smell**  
11 **dysfunction: a biomarker for COVID-19** [published online ahead of print, 2020 Apr 17]. Int Forum  
12 **dysfunction: a biomarker for COVID-19** [published online ahead of print, 2020 Apr 17]. Int Forum  
13 Allergy Rhinol. 2020;10.1002/alr.22587. doi:10.1002/alr.22587  
14  
15  
16  
17  
18 19. Doty RL, Shaman P, Applebaum SL, Giberson R, Siksorski L, Rosenberg L. **Smell dentification**  
19 **ability: changes with age.** Science 1984; 226: 1441-3.  
20  
21  
22  
23 20. Miwa T, Furukawa M, Tsukatani T, Costanzo RM, DiNardo LJ, Reiter ER. **Impact of olfactory**  
24 **impairment on quality of life and disability.** Arch Otolaryngol Head Neck Surg. 2001;127(5):497–  
25 **impairment on quality of life and disability.** Arch Otolaryngol Head Neck Surg. 2001;127(5):497–  
26 503. doi:10.1001/archotol.127.5.497  
27  
28  
29  
30  
31 21. Rusthen S, Young A, Herlofson BB, et al. **Oral disorders, saliva secretion, and oral health-**  
32 **related quality of life in patients with primary Sjögren's syndrome.** Eur J Oral Sci.  
33 **related quality of life in patients with primary Sjögren's syndrome.** Eur J Oral Sci.  
34 2017;125(4):265–271. doi:10.1111/eos.12358  
35  
36  
37  
38 22. Sungnak W, Huang N, Bécavin C, et al. **SARS-CoV-2 entry factors are highly expressed in nasal**  
39 **epithelial cells together with innate immune genes** [published online ahead of print, 2020 Apr  
40 **epithelial cells together with innate immune genes** [published online ahead of print, 2020 Apr  
41 23]. Nat Med. 2020;10.1038/s41591-020-0868-6. doi:10.1038/s41591-020-0868-6  
42  
43  
44  
45  
46 23. Tang N, Bai H, Chen X, Gong J, Li D, Sun Z. **Anticoagulant treatment is associated with**  
47 **decreased mortality in severe coronavirus disease 2019 patients with coagulopathy.** J Thromb  
48 **decreased mortality in severe coronavirus disease 2019 patients with coagulopathy.** J Thromb  
49 Haemost. 2020 Mar 27. doi: 10.1111/jth.14817  
50  
51  
52  
53  
54  
55  
56  
57  
58  
59  
60

- 1  
2  
3 24. Yan CH, Faraji F, Prajapati DP, Ostrander BT, DeConde AS. **Self-reported olfactory loss**  
4 **associates with outpatient clinical course in COVID-19.** *Int Forum Allergy Rhinol.*  
5  
6 2020;10(7):821-831. doi:10.1002/alr.22592  
7  
8  
9  
10  
11 25. Vaira LA, Hopkins C, Petrocelli M, et al. **Do olfactory and gustatory psychophysical**  
12 **scores have prognostic value in COVID-19 patients? A prospective study of 106**  
13 **patients.** *J Otolaryngol Head Neck Surg.* 2020;49(1):56. Published 2020 Aug 6.  
14  
15 doi:10.1186/s40463-020-00449-y  
16  
17  
18  
19  
20  
21 26. Ruan Q, Yang K, Wang W, Jiang L, Song J. **Clinical predictors of mortality due to COVID-19**  
22 **based on an analysis of data of 150 patients from Wuhan, China** [published online ahead of print,  
23 2020 Mar 3] [published correction appears in *Intensive Care Med.* 2020 Apr 6;:]. *Intensive Care*  
24 *Med.* 2020;1–3. doi:10.1007/s00134-020-05991-x  
25  
26  
27  
28  
29  
30  
31 27. Yang X, Yu Y, Xu J, Shu H, Xia J, Liu H, et al. **Clinical course and outcomes of critically ill**  
32 **patients with SARS-CoV-2 pneumonia in Wuhan, China: a single-centered, retrospective,**  
33 **observational study.** *Lancet Respir Med* 2020. doi:10.1016/S2213-2600(20)30079-5.  
34  
35  
36  
37  
38  
39 28. Zhou F, Yu T, Du R, Fan G, Liu Y, Liu Z, et al. **Clinical course and risk factors for mortality of**  
40 **adult inpatients with COVID-19 in Wuhan, China: a retrospective cohort study.** *Lancet* 2020. Zhou  
41 F, Yu T, Du R, Fan G, Liu Y, Liu Z, et al. Clinical course and risk factors for mortality of adult  
42 inpatients with COVID-19 in Wuhan, China: a retrospective cohort study. *Lancet* 2020.  
43  
44  
45  
46  
47  
48  
49  
50  
51  
52  
53  
54  
55  
56  
57  
58  
59  
60

STROBE Statement—Checklist of items that should be included in reports of *cohort studies*

|                              | Item No | Recommendation                                                                                                                                                                                                                                                                                                         | Page No  |
|------------------------------|---------|------------------------------------------------------------------------------------------------------------------------------------------------------------------------------------------------------------------------------------------------------------------------------------------------------------------------|----------|
| <b>Title and abstract</b>    | 1       | (a) Indicate the study's design with a commonly used term in the title or the abstract<br>(b) Provide in the abstract an informative and balanced summary of what was done and what was found                                                                                                                          | 2,3<br>3 |
| <b>Introduction</b>          |         |                                                                                                                                                                                                                                                                                                                        |          |
| Background/rationale         | 2       | Explain the scientific background and rationale for the investigation being reported                                                                                                                                                                                                                                   | 5        |
| Objectives                   | 3       | State specific objectives, including any prespecified hypotheses                                                                                                                                                                                                                                                       | 6        |
| <b>Methods</b>               |         |                                                                                                                                                                                                                                                                                                                        |          |
| Study design                 | 4       | Present key elements of study design early in the paper                                                                                                                                                                                                                                                                | 7        |
| Setting                      | 5       | Describe the setting, locations, and relevant dates, including periods of recruitment, exposure, follow-up, and data collection                                                                                                                                                                                        | 7        |
| Participants                 | 6       | (a) Give the eligibility criteria, and the sources and methods of selection of participants. Describe methods of follow-up<br>(b) For matched studies, give matching criteria and number of exposed and unexposed                                                                                                      | 7,8      |
| Variables                    | 7       | Clearly define all outcomes, exposures, predictors, potential confounders, and effect modifiers. Give diagnostic criteria, if applicable                                                                                                                                                                               | 8        |
| Data sources/<br>measurement | 8*      | For each variable of interest, give sources of data and details of methods of assessment (measurement). Describe comparability of assessment methods if there is more than one group                                                                                                                                   | 8        |
| Bias                         | 9       | Describe any efforts to address potential sources of bias                                                                                                                                                                                                                                                              | 8        |
| Study size                   | 10      | Explain how the study size was arrived at                                                                                                                                                                                                                                                                              | 9        |
| Quantitative variables       | 11      | Explain how quantitative variables were handled in the analyses. If applicable, describe which groupings were chosen and why                                                                                                                                                                                           | 10       |
| Statistical methods          | 12      | (a) Describe all statistical methods, including those used to control for confounding<br>(b) Describe any methods used to examine subgroups and interactions<br>(c) Explain how missing data were addressed<br>(d) If applicable, explain how loss to follow-up was addressed<br>(e) Describe any sensitivity analyses | 9-10     |
| <b>Results</b>               |         |                                                                                                                                                                                                                                                                                                                        |          |
| Participants                 | 13*     | (a) Report numbers of individuals at each stage of study—eg numbers potentially eligible, examined for eligibility, confirmed eligible, included in the study, completing follow-up, and analysed<br>(b) Give reasons for non-participation at each stage<br>(c) Consider use of a flow diagram                        | 11       |
| Descriptive data             | 14*     | (a) Give characteristics of study participants (eg demographic, clinical, social) and information on exposures and potential confounders<br>(b) Indicate number of participants with missing data for each variable of interest<br>(c) Summarise follow-up time (eg, average and total amount)                         | 11       |
| Outcome data                 | 15*     | Report numbers of outcome events or summary measures over time                                                                                                                                                                                                                                                         | 13       |

|    |                          |    |                                                                                                                                                                                                              |    |
|----|--------------------------|----|--------------------------------------------------------------------------------------------------------------------------------------------------------------------------------------------------------------|----|
| 1  | Main results             | 16 | (a) Give unadjusted estimates and, if applicable, confounder-adjusted estimates and their precision (eg, 95% confidence interval). Make clear which confounders were adjusted for and why they were included | 11 |
| 2  |                          |    | (b) Report category boundaries when continuous variables were categorized                                                                                                                                    | 12 |
| 3  |                          |    | (c) If relevant, consider translating estimates of relative risk into absolute risk for a meaningful time period                                                                                             |    |
| 4  |                          |    |                                                                                                                                                                                                              |    |
| 5  |                          |    |                                                                                                                                                                                                              |    |
| 6  |                          |    |                                                                                                                                                                                                              |    |
| 7  |                          |    |                                                                                                                                                                                                              |    |
| 8  |                          |    |                                                                                                                                                                                                              |    |
| 9  | Other analyses           | 17 | Report other analyses done—eg analyses of subgroups and interactions, and sensitivity analyses                                                                                                               | 12 |
| 10 |                          |    |                                                                                                                                                                                                              |    |
| 11 | <b>Discussion</b>        |    |                                                                                                                                                                                                              |    |
| 12 |                          |    |                                                                                                                                                                                                              |    |
| 13 | Key results              | 18 | Summarise key results with reference to study objectives                                                                                                                                                     | 14 |
| 14 | Limitations              | 19 | Discuss limitations of the study, taking into account sources of potential bias or imprecision. Discuss both direction and magnitude of any potential bias                                                   | 16 |
| 15 |                          |    |                                                                                                                                                                                                              |    |
| 16 | Interpretation           | 20 | Give a cautious overall interpretation of results considering objectives, limitations, multiplicity of analyses, results from similar studies, and other relevant evidence                                   | 15 |
| 17 |                          |    |                                                                                                                                                                                                              |    |
| 18 |                          |    |                                                                                                                                                                                                              |    |
| 19 | Generalisability         | 21 | Discuss the generalisability (external validity) of the study results                                                                                                                                        | 16 |
| 20 |                          |    |                                                                                                                                                                                                              |    |
| 21 | <b>Other information</b> |    |                                                                                                                                                                                                              |    |
| 22 | Funding                  | 22 | Give the source of funding and the role of the funders for the present study and, if applicable, for the original study on which the present article is based                                                | 18 |
| 23 |                          |    |                                                                                                                                                                                                              |    |
| 24 |                          |    |                                                                                                                                                                                                              |    |

\*Give information separately for exposed and unexposed groups.

**Note:** An Explanation and Elaboration article discusses each checklist item and gives methodological background and published examples of transparent reporting. The STROBE checklist is best used in conjunction with this article (freely available on the Web sites of PLoS Medicine at <http://www.plosmedicine.org/>, Annals of Internal Medicine at <http://www.annals.org/>, and Epidemiology at <http://www.epidem.com/>). Information on the STROBE Initiative is available at <http://www.strobe-statement.org>.

# BMJ Open

## GUSTATORY AND OLFACTORY DYSFUNCTION IN HOSPITALIZED PATIENTS WITH COVID-19 PNEUMONIA: A PROSPECTIVE STUDY

|                               |                                                                                                                                                                                                                                                                                                                                                                                                                                                                                                                                                                                                                                                                                                                                                                                                                                                                                                                                                                                                                                                                                                                                                                                                                                                                                                                                                                                                                                                                                                                                                                                                                                                                                                                                                                                                                                                                                                                                                                                                                                                                                                                                                                          |
|-------------------------------|--------------------------------------------------------------------------------------------------------------------------------------------------------------------------------------------------------------------------------------------------------------------------------------------------------------------------------------------------------------------------------------------------------------------------------------------------------------------------------------------------------------------------------------------------------------------------------------------------------------------------------------------------------------------------------------------------------------------------------------------------------------------------------------------------------------------------------------------------------------------------------------------------------------------------------------------------------------------------------------------------------------------------------------------------------------------------------------------------------------------------------------------------------------------------------------------------------------------------------------------------------------------------------------------------------------------------------------------------------------------------------------------------------------------------------------------------------------------------------------------------------------------------------------------------------------------------------------------------------------------------------------------------------------------------------------------------------------------------------------------------------------------------------------------------------------------------------------------------------------------------------------------------------------------------------------------------------------------------------------------------------------------------------------------------------------------------------------------------------------------------------------------------------------------------|
| Journal:                      | <i>BMJ Open</i>                                                                                                                                                                                                                                                                                                                                                                                                                                                                                                                                                                                                                                                                                                                                                                                                                                                                                                                                                                                                                                                                                                                                                                                                                                                                                                                                                                                                                                                                                                                                                                                                                                                                                                                                                                                                                                                                                                                                                                                                                                                                                                                                                          |
| Manuscript ID                 | bmjopen-2020-040775.R2                                                                                                                                                                                                                                                                                                                                                                                                                                                                                                                                                                                                                                                                                                                                                                                                                                                                                                                                                                                                                                                                                                                                                                                                                                                                                                                                                                                                                                                                                                                                                                                                                                                                                                                                                                                                                                                                                                                                                                                                                                                                                                                                                   |
| Article Type:                 | Original research                                                                                                                                                                                                                                                                                                                                                                                                                                                                                                                                                                                                                                                                                                                                                                                                                                                                                                                                                                                                                                                                                                                                                                                                                                                                                                                                                                                                                                                                                                                                                                                                                                                                                                                                                                                                                                                                                                                                                                                                                                                                                                                                                        |
| Date Submitted by the Author: | 11-Jan-2021                                                                                                                                                                                                                                                                                                                                                                                                                                                                                                                                                                                                                                                                                                                                                                                                                                                                                                                                                                                                                                                                                                                                                                                                                                                                                                                                                                                                                                                                                                                                                                                                                                                                                                                                                                                                                                                                                                                                                                                                                                                                                                                                                              |
| Complete List of Authors:     | <p>Inciarte, Alexy; Hospital Clínic de Barcelona, Infectious disease; Universidad de Barcelona Facultad de Medicina y Ciencias de La Salud, Cardozo, Celia; Hospital Clínic de Barcelona, Infectious Diseases Department</p> <p>Chumbita, Mariana; Hospital Clínic de Barcelona, Infectious Diseases Department; Hospital Clínic de Barcelona, Infectious Diseases Department</p> <p>ALCUBILLA, Pau; Hospital Clínic de Barcelona, Infectious Diseases Department; Universidad de Barcelona Facultad de Medicina y Ciencias de La Salud,</p> <p>Torres, Berta; Hospital Clínic de Barcelona, Infectious Diseases Department; Universidad de Barcelona Facultad de Medicina y Ciencias de La Salud,</p> <p>González Cordón, Ana; Hospital Clínic de Barcelona, Infectious Diseases Department; Universidad de Barcelona Facultad de Medicina y Ciencias de La Salud,</p> <p>Rico, Verónica; Hospital Clínic de Barcelona, Infectious Diseases Department; Universidad de Barcelona Facultad de Medicina y Ciencias de La Salud,</p> <p>Aguero, Daiana; Hospital Clínic de Barcelona, Infectious Diseases Department; Universidad de Barcelona Facultad de Medicina y Ciencias de La Salud,</p> <p>García-Pouton, Nicole; Hospital Clínic de Barcelona, Infectious Diseases Department; Universidad de Barcelona Facultad de Medicina y Ciencias de La Salud,</p> <p>Hernández-Meneses, Marta; Hospital Clínic de Barcelona, Infectious Diseases Department; Universidad de Barcelona Facultad de Medicina y Ciencias de La Salud,</p> <p>ALBIACH, Laia; Hospital Clínic de Barcelona, Infectious Diseases Department; Universidad de Barcelona Facultad de Medicina y Ciencias de La Salud,</p> <p>Meira, Fernanda; Hospital Clínic de Barcelona, Infectious Diseases Department; Universidad de Barcelona Facultad de Medicina y Ciencias de La Salud,</p> <p>De la Mora, Lorena ; Hospital Clínic de Barcelona, Infectious Diseases Department; Universidad de Barcelona Facultad de Medicina y Ciencias de La Salud,</p> <p>Linares, laura; Hospital Clínic de Barcelona, Infectious Diseases Department; Universidad de Barcelona Facultad de Medicina y Ciencias</p> |

|                                 |                                                                                                                                                                                                                                                                                                                                                                                                                                                                                                                                                                                                                                                                                                                                                                                                                                                                                                                                                                                                                                                                                                                                                                                                                                                                                                                                                                                                                                                                                                                                                                                                                                                                                                                                                                                                                                                                                                                                                                                                                                                                                                                                                                                                                                                                                                                                                                                                                                                                                                                                                                                                                                                                                                                               |
|---------------------------------|-------------------------------------------------------------------------------------------------------------------------------------------------------------------------------------------------------------------------------------------------------------------------------------------------------------------------------------------------------------------------------------------------------------------------------------------------------------------------------------------------------------------------------------------------------------------------------------------------------------------------------------------------------------------------------------------------------------------------------------------------------------------------------------------------------------------------------------------------------------------------------------------------------------------------------------------------------------------------------------------------------------------------------------------------------------------------------------------------------------------------------------------------------------------------------------------------------------------------------------------------------------------------------------------------------------------------------------------------------------------------------------------------------------------------------------------------------------------------------------------------------------------------------------------------------------------------------------------------------------------------------------------------------------------------------------------------------------------------------------------------------------------------------------------------------------------------------------------------------------------------------------------------------------------------------------------------------------------------------------------------------------------------------------------------------------------------------------------------------------------------------------------------------------------------------------------------------------------------------------------------------------------------------------------------------------------------------------------------------------------------------------------------------------------------------------------------------------------------------------------------------------------------------------------------------------------------------------------------------------------------------------------------------------------------------------------------------------------------------|
|                                 | <p>de La Salud,<br/>Puerta-Alcalde, Pedro; Hospital Clínic de Barcelona, Infectious Diseases Department; Universidad de Barcelona Facultad de Medicina y Ciencias de La Salud,<br/>Macaya, Irene; Hospital Clínic de Barcelona, Infectious Diseases Department; Universidad de Barcelona Facultad de Medicina y Ciencias de La Salud,<br/>Mensa, Josep; Hospital Clínic de Barcelona, Infectious Diseases Department<br/>Laguno, Montse; Hospital Clinic de Barcelona, Infectious disease; Universidad de Barcelona Facultad de Medicina y Ciencias de La Salud,<br/>AMBROSIONI, Juan ; Hospital Clinic de Barcelona, Infectious disease; Universidad de Barcelona Facultad de Medicina y Ciencias de La Salud,<br/>Ramos, Angela; Hospital Clinic de Barcelona, Infectious disease; Universidad de Barcelona Facultad de Medicina y Ciencias de La Salud,<br/>Morata, Laura; Hospital Clinic de Barcelona, Infectious disease; Universidad de Barcelona Facultad de Medicina y Ciencias de La Salud,<br/>Bodro, Marta; Hospital Clinic de Barcelona, Infectious disease; Universidad de Barcelona Facultad de Medicina y Ciencias de La Salud,<br/>Moreno-García, Estela; Universidad de Barcelona Facultad de Medicina y Ciencias de La Salud, ; Universidad de Barcelona Facultad de Medicina y Ciencias de La Salud,<br/>Moreno, Antonio ; Hospital Clinic de Barcelona, Infectious disease; Universidad de Barcelona Facultad de Medicina y Ciencias de La Salud,<br/>Sola, Montse; Hospital Clinic de Barcelona, Infectious disease; Universidad de Barcelona Facultad de Medicina y Ciencias de La Salud,<br/>Rojas, Jhon; Hospital Clinic de Barcelona, Infectious disease; Universidad de Barcelona Facultad de Medicina y Ciencias de La Salud,<br/>Leal, Lorna; Hospital Clinic de Barcelona, Infectious disease; Universidad de Barcelona Facultad de Medicina y Ciencias de La Salud,<br/>Torres, Manuel ; Universidad de Barcelona Facultad de Medicina y Ciencias de La Salud, ; Universidad de Barcelona Facultad de Medicina y Ciencias de La Salud,<br/>Garcia-Vidal, Carolina; Hospital Clinic de Barcelona, Infectious disease; Universidad de Barcelona Facultad de Medicina y Ciencias de La Salud,<br/>Martínez, Jose Antonio; Hospital Clínic de Barcelona, Infectious Diseases Department; University of Barcelona<br/>Alobid, Isam; Hospital Clinic de Barcelona, Unitat de Rinologia i Clínica de l'Olfacte, Servei d'Otorinolaringologia<br/>Soriano, Alex; Hospital Clínic de Barcelona, Infectious Diseases Department; University of Barcelona<br/>Garcia, Felipe; Hospital Clinic de Barcelona, Infectious disease; Universidad de Barcelona Facultad de Medicina y Ciencias de La Salud,</p> |
| <b>Primary Subject Heading</b>: | Infectious diseases                                                                                                                                                                                                                                                                                                                                                                                                                                                                                                                                                                                                                                                                                                                                                                                                                                                                                                                                                                                                                                                                                                                                                                                                                                                                                                                                                                                                                                                                                                                                                                                                                                                                                                                                                                                                                                                                                                                                                                                                                                                                                                                                                                                                                                                                                                                                                                                                                                                                                                                                                                                                                                                                                                           |
| Secondary Subject Heading:      | Epidemiology                                                                                                                                                                                                                                                                                                                                                                                                                                                                                                                                                                                                                                                                                                                                                                                                                                                                                                                                                                                                                                                                                                                                                                                                                                                                                                                                                                                                                                                                                                                                                                                                                                                                                                                                                                                                                                                                                                                                                                                                                                                                                                                                                                                                                                                                                                                                                                                                                                                                                                                                                                                                                                                                                                                  |
| Keywords:                       | INFECTIOUS DISEASES, Public health < INFECTIOUS DISEASES, Infection control < INFECTIOUS DISEASES, COVID-19, Adult otolaryngology < OTOLARYNGOLOGY, Respiratory infections < THORACIC MEDICINE                                                                                                                                                                                                                                                                                                                                                                                                                                                                                                                                                                                                                                                                                                                                                                                                                                                                                                                                                                                                                                                                                                                                                                                                                                                                                                                                                                                                                                                                                                                                                                                                                                                                                                                                                                                                                                                                                                                                                                                                                                                                                                                                                                                                                                                                                                                                                                                                                                                                                                                                |

SCHOLARONE™  
Manuscripts

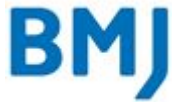

I, the Submitting Author has the right to grant and does grant on behalf of all authors of the Work (as defined in the below author licence), an exclusive licence and/or a non-exclusive licence for contributions from authors who are: i) UK Crown employees; ii) where BMJ has agreed a CC-BY licence shall apply, and/or iii) in accordance with the terms applicable for US Federal Government officers or employees acting as part of their official duties; on a worldwide, perpetual, irrevocable, royalty-free basis to BMJ Publishing Group Ltd ("BMJ") its licensees and where the relevant Journal is co-owned by BMJ to the co-owners of the Journal, to publish the Work in this journal and any other BMJ products and to exploit all rights, as set out in our [licence](#).

The Submitting Author accepts and understands that any supply made under these terms is made by BMJ to the Submitting Author unless you are acting as an employee on behalf of your employer or a postgraduate student of an affiliated institution which is paying any applicable article publishing charge ("APC") for Open Access articles. Where the Submitting Author wishes to make the Work available on an Open Access basis (and intends to pay the relevant APC), the terms of reuse of such Open Access shall be governed by a Creative Commons licence – details of these licences and which [Creative Commons](#) licence will apply to this Work are set out in our licence referred to above.

Other than as permitted in any relevant BMJ Author's Self Archiving Policies, I confirm this Work has not been accepted for publication elsewhere, is not being considered for publication elsewhere and does not duplicate material already published. I confirm all authors consent to publication of this Work and authorise the granting of this licence.

# GUSTATORY AND OLFACTORY DYSFUNCTION IN HOSPITALIZED PATIENTS

## WITH COVID-19 PNEUMONIA: A PROSPECTIVE STUDY

Alexy Inciarte, MD<sup>1</sup>; Celia Cardozo, MD<sup>1</sup>; Mariana Chumbita, MD<sup>1</sup>, Pau Alcubilla, MD<sup>1</sup>; Berta Torres MD, PhD<sup>1</sup>; Ana González-Cordón, MD, PhD<sup>1</sup>; Verónica Rico, MD<sup>1</sup>; Daiana Agüero, MD<sup>1</sup>; Nicole García-Pouton, MD<sup>1</sup>; Marta Hernández-Meneses, MD<sup>1</sup>; Laia Albiach, MD<sup>1</sup>; Fernanda Meira, MD<sup>1</sup>; Lorena De la Mora, MD<sup>1</sup>; Laura Linares, MD, PhD<sup>1</sup>; Pedro Puerta-Alcalde, MD, PhD<sup>1</sup>; Irene Macaya, MD<sup>1</sup>; Josep Mensa, MD<sup>1</sup>; Montse Laguno, MD, PhD<sup>1</sup>; Juan Ambrosioni, MD, PhD<sup>1</sup>; Angela Ramos, B.N<sup>1</sup>; Laura Morata, MD, PhD<sup>1</sup>; Marta Bodro, MD, PhD<sup>1</sup>; Estela Moreno-García, MD<sup>1</sup>; Antonio Moreno, MD<sup>1</sup>; Montse Solá, B.N<sup>1</sup>; Jhon Rojas, MD, PhD<sup>1</sup>; Lorna Leal, MD, PhD<sup>1</sup>; Manuel Torres, MD<sup>1</sup>; Carolina Garcia-Vidal, MD, PhD<sup>1</sup>; José Antonio Martínez, MD, PhD<sup>1</sup>; Isam Alobid MD, PhD<sup>1</sup>; Alex Soriano, MD, PhD<sup>1</sup>; and Felipe García, MD, PhD<sup>1†</sup>.

**Running title:** Olfactory and gustatory dysfunction in COVID-19 pneumonia.

<sup>1</sup>*Hospital Clínic of Barcelona, Infectious Disease Department, University of Barcelona, Institut*

*d'Investigacions Biomèdiques August Pi I Sunyer (IDIBAPS), Barcelona, Spain*

†Correspondence to: Dr. Felipe García, MD, PhD; Infectious Disease Unit, Hospital Clínic, Villarroel, 170, 08036 Barcelona, Spain. Phone: 34932275586, FAX: 34934514438, E-mail:

[fgarcia@clinic.cat](mailto:fgarcia@clinic.cat)

Manuscript word count; 2968.



## ABSTRACT

**Importance:** Identifying undetected clinical signs is imperative in the prevention of SARS-CoV-2.

**Objective:** To establish the prevalence of clinical gustatory and olfactory dysfunction in patients with COVID-19 pneumonia. Clinical outcomes and recovery rates associated with gustatory and olfactory dysfunction were also assessed.

**Design:** A prospective study was performed in 80 patients admitted to Hospital Clínic of Barcelona (Spain) for COVID-19 pneumonia. Patients were reevaluated in the ward daily until discharge. Gustatory and olfactory dysfunction symptoms were retrospectively collected from emergency room (ER) charts after first assessments. Follow-up was performed in telemedicine consultation.

**Setting:** The single-center study was performed in a hospitalization ward at a university hospital.

**Participants:** Consecutive patients meeting hospitalization criteria for COVID-19 pneumonia were eligible. Study exclusion criteria were patients who could not speak, had previous gustatory and olfactory dysfunction or whose PCR tests for SARS-CoV-19 were negative.

**Interventions:** Systematic assessment of gustatory and olfactory symptoms with standardized questions.

**Outcome(s):** Prevalence of gustatory and olfactory dysfunction in patients with COVID-19 pneumonia.

**Results:** Of the 80 study subjects, 62.5% were male and the median age was 57 years. Half of the cohort (n=40) presented with comorbidities. The prevalence of chemosensitive disorder was 73.8%(n=59) [CI-95%,(63.8-83.8)], although self-reported symptoms were recorded in only 26.3%(n=21) of patients in the ER. Gustatory and olfactory dysfunction were observed in 58.8%(n=47) and 55%(n=44) of cases, respectively. They were also the first symptoms in 25%(n=20) of patients. Anosmia was associated with ageusia, OR:7(CI-95%,2.3-21.8 p=0.001). No differences in

1  
2  
3 clinical outcomes were observed when patients with and without gustatory and olfactory  
4  
5 dysfunction were compared. Recovery rates were 20%(n=10) and 85%(n=42) at day 7 and 45,  
6  
7 respectively.  
8  
9

10 **Conclusion:** The prevalence of gustatory and olfactory dysfunction in COVID-19 pneumonia was  
11  
12 much higher than in self-report. Presence of gustatory and olfactory dysfunction was not a predictor  
13  
14 of clinical outcomes.  
15  
16  
17  
18  
19  
20  
21  
22  
23  
24  
25  
26  
27  
28  
29  
30  
31  
32  
33  
34  
35  
36  
37  
38  
39  
40  
41  
42  
43  
44  
45  
46  
47  
48  
49  
50  
51  
52  
53  
54  
55  
56  
57  
58  
59  
60

## Article Summary

- Prospective study design in consecutive patients with COVID-19 pneumonia.
- Prospective recovery rates of gustatory and olfactory function in patients with COVID-19 pneumonia.
- Lack of validated questionnaires of olfactory and gustatory function.
- Lack of quantitative assessments of olfactory and gustatory function.
- The selected population primarily represents hospitalized patients, excluding milder cases.

## Introduction

The severe acute respiratory syndrome coronavirus 2 (SARS-CoV-2) has resulted in a pandemic with more than 26 million reported cases and, as last reported in September 2020, 800000 deaths **(1)**. With no effective vaccine available, basic preventive strategies against transmission of the highly contagious virus include the early recognition of potential clinical signs. Such a strategy could minimize the possibility of early transmission, as has been described in several studies **(2-4)**. Similarly, per the latest recommendations of the World Health Organization, establishing contact tracing of suspected cases could provide key clinical findings related to SARS-CoV-2 and mitigate risk of transmission **(5)**. Lastly, prompt diagnosis and treatment of possibly severe viral infection could improve clinical outcomes.

Within this context, gustatory and olfactory dysfunction is an unrecognized and poorly defined condition, for which establishing strong causal relationships is challenging. Viruses, however, are the most frequent pathogens with respect to etiology. For example, *Coronavirus*, *Influenza* and *Picornavirus* have been detected in nasal secretions in smell studies, with various degrees of severity and an even permanent loss of smell and taste **(6)**. Consequently, gustatory and olfactory dysfunction leads to a decrease in the quality of life and mood state **(7)**.

When initial reports of the SARS-CoV-2 outbreak in Wuhan area were published, gustatory and olfactory dysfunction were not described **(8-10)**. However, a small retrospective study performed in Milan estimated a prevalence of gustatory and olfactory dysfunction of around 34% of hospitalized patients with coronavirus disease 2019 (COVID-19) infection **(11)**. Similarly, several other reports of isolated sudden onset anosmia have recently been described in patients with COVID-19 **(12,13)**. Finally, a multicenter, cross-sectional study

1  
2  
3 performed in France and Belgium reported a prevalence of gustatory and olfactory  
4  
5 dysfunction of 85% in mild cases of COVID-19 **(14)**.  
6  
7

8  
9 However, incidence of gustatory and olfactory dysfunction has yet to be defined in severe  
10  
11 cases of COVID-19 requiring hospital admission. Since the onset of the pandemic in  
12  
13 Barcelona, a great number of gustatory and olfactory symptoms have been self-reported by  
14  
15 patients admitted to our health care center for confirmed COVID-19 pneumonia. The  
16  
17 present study aims to estimate the prevalence, clinical traits and evolution of gustatory and  
18  
19 olfactory dysfunction in patients hospitalized for COVID-19 pneumonia.  
20  
21  
22  
23  
24  
25  
26  
27  
28  
29  
30  
31  
32  
33  
34  
35  
36  
37  
38  
39  
40  
41  
42  
43  
44  
45  
46  
47  
48  
49  
50  
51  
52  
53  
54  
55  
56  
57  
58  
59  
60

## **Materials and methods**

### **Study design**

We performed a prospective assessment on patients consecutively admitted to a dedicated ward where attending physicians evaluated gustatory and olfactory dysfunction. After initial evaluations, a retrospective review of ER charts prior to admission was also performed to determine self-report. Negative findings were determined by the absence of the studied symptoms on ER charts, whereas positive findings were determined by the presence of studied symptoms on ER charts. The study was conducted at Hospital Clínic of Barcelona, a tertiary university reference center. The study population comprised patients with COVID-19 pneumonia admitted to a hospitalization ward between February 28<sup>th</sup> and April 24<sup>th</sup>, 2020. Data collection was performed on April 30<sup>th</sup>, 2020.

The main objective of this study was to determine the proportion of gustatory and olfactory dysfunction in hospitalized patients with confirmed COVID-19 pneumonia. Secondary endpoints were to define clinical traits, describe laboratory values, identify factors associated with gustatory and olfactory dysfunction, explore potential differential outcomes between patients with and without gustatory and olfactory dysfunction, and examine time to recovery rates from gustatory and olfactory dysfunction.

### **Patients**

SARS-CoV-2 infection was confirmed by either real-time polymerase chain reaction (PCR) viral detection in a nasopharyngeal swab or by clinical and radiological characteristics set forth by ECDC criteria **(15)**, including: 1) acute respiratory tract infection (sudden onset of cough, fever and shortness of breath) and 2) severe acute respiratory infection [fever and at least one sign/symptom of respiratory disease (e.g., cough, fever or shortness of breath) ]

1  
2  
3 requiring hospitalization with unilateral or bilateral interstitial infiltrate in the chest X-ray.  
4  
5 This clinical definition was set on March 15<sup>th</sup>, 2020, when the percentage of  
6  
7 microbiologically-confirmed cases of COVID-19 from all collected samples was higher than  
8  
9 70%. Patients with prior dysfunction, unable to speak, with mental impairment or who  
10  
11 tested negative for SARS-CoV-2 were excluded from the analysis. Additionally, to avoid  
12  
13 memory bias, patients with direct admission to the intensive care unit (ICU) or posterior  
14  
15 discharge to the ward were excluded. Inclusion of consecutive patients from the same ward  
16  
17 was established to avoid selection bias.  
18  
19  
20  
21

## 22 **Data Collection**

23  
24  
25 Directed anamnesis was performed in each patient upon arrival to the ward, including  
26  
27 baseline characteristics, demographics and classic pneumonia signs. Patients were asked  
28  
29 about gustatory and olfactory dysfunction symptoms, such as ageusia, dysgeusia, anosmia  
30  
31 and hyposmia on a daily basis until discharge. The following questions were asked  
32  
33 systematically to all patients: 1) have you noticed any sudden and recent changes in smell  
34  
35 and taste?; 2) If the response was affirmative, was this the first symptom?; 3) is there a total  
36  
37 loss of taste and smell; 4) is there a partial loss of taste and smell?; 5) have the symptoms  
38  
39 disappeared?; and, 6) when did the symptoms disappear? Gustatory and olfactory  
40  
41 dysfunction were reevaluated during telemedicine consultations on a weekly basis after  
42  
43 discharge. The following questions were then asked systematically to all discharged patients:  
44  
45 1) was there resolution of symptoms?; 2) was there partial or total recovery?; and, 3) when  
46  
47 did symptoms resolve? Additional laboratory tests (liver enzymes, creatinine, C-reactive  
48  
49 protein, leukocyte count, CD4, CD8 and CD3 count, ferritin and D-dimer levels, and  
50  
51 procalcitonin) were performed in all patients. The last follow-up date was April 24<sup>th</sup>, 2020.  
52  
53  
54  
55  
56  
57  
58  
59  
60

1  
2  
3 For data collection, variables were extracted from electronic health records in the SAP 740  
4  
5 Hospital Information System© (Societas Europaea, Walldorf, Germany). The results obtained  
6  
7 were included in a database created with MICROSOFT EXCEL© for later analysis with  
8  
9 statistical package SPSS v18.0© (IBM corporation, Armonk, New York, USA).  
10  
11

### 12 **Statistical analysis**

13  
14  
15 The primary endpoint of the study was to determine the proportion of patients with  
16  
17 gustatory and olfactory dysfunction, reflected in percentages with a confidence level of 95%.  
18  
19 The Fisher's exact test was performed to analyze categorical variables between groups;  
20  
21 significant p values were shown in odds ratios and confidence intervals. The significance  
22  
23 level was set at a p-value <0.05. Inferential analysis of continuous variables, such as  
24  
25 laboratory values, was performed using parametric tests (Student's t-test); Pearson test was  
26  
27 performed to correlate the duration of symptoms and inflammatory markers. Missing data  
28  
29 was reduced by the use of an operator manual at the start of the study and careful data  
30  
31 collection. Missing data was managed with the listwise approach.  
32  
33  
34  
35  
36

### 37 **Sample size calculation**

38  
39  
40 An estimated sample size of 80 patients would allow for an expected prevalence of 33% at a  
41  
42 10.5% accuracy rate and 95% confidence interval, as has been shown in a prior study by  
43  
44 Giacomelli *et al.* (11)  
45  
46  
47  
48  
49  
50  
51  
52  
53  
54  
55  
56  
57  
58  
59  
60



### **Ethics**

The hospital's research ethics committee and competent Spanish authorities approved the protocol describing the project proposed by the researcher (approval number HCB/2020/0458). Processing, reporting and transfer of personal data for all participating subjects complied with provisions in Organic Act 15/1999 of December 13<sup>th</sup> (Spanish Royal Decree 1720/2007 of December 21<sup>st</sup>) and in current Regulation EU 2016/679 of the European Parliament and the European Council on April 27<sup>th</sup>, 2016, being mandatory after May 25<sup>th</sup>, 2018, on the Protection of Personal Data and guarantee of digital rights. The patients either signed written consent or when not possible, due to the pandemic and isolation measures in place, provided oral consent. In such cases, oral consent was recorded in Electronic Clinical Documentation.

**Patient and public involvement:** The patients were not involved in the study described.

## **Results**

### **Baseline characteristics**

Of the 1738 patients with COVID-19 admitted to the hospital between February 28<sup>th</sup> and April 24<sup>th</sup>, 1371 were placed in several hospitalization wards and 337 in the intensive care unit (ICU). Analysis of gustatory and olfactory dysfunction was prospectively performed in 80 patients [Figure 1 flow chart]. The median (IQR) age was 57 (43-70) years and 62.5 % were males. Eleven (14%) patients were health care workers. Continent origin of patients comprised 71% (n=57) European primarily, and 25% (n=20) Latin American. Comorbidities were present in 50% (n=40) of patients. The median (IQR) time from symptom onset to hospital admission was 8 (5-10) days, and the median (IQR) length of stay (LOS) was 8 (5-12.5) days [Table 1].

### **Gustatory and olfactory dysfunction**

The main clinical symptoms reported by patients are depicted in Table 1. The prevalence of gustatory and olfactory dysfunction was found to be 73.8 % (n=59) [95 % (CI 63.8% to 83.8 %) in this sample. Separately, gustatory and olfactory dysfunction was present in 58.8% (n=47) and 55% (n=44) of cases, respectively. Anosmia was the most frequent symptom present in 46.3% (n=37) of cases, followed by dysgeusia in 41.3 % (n=33), ageusia in 28.3% (n=23) and hyposmia in 15% (n=12). In 21% (n=7) of cases of dysgeusia, patients reported a salty taste. There was an association between ageusia and anosmia, OR: 7 [IC: 95 2.26 to 21.8 p= 0.001]. Gustatory and olfactory dysfunction was the first symptom to appear in 25% (n=20) of cases. Only one case presented with gustatory and olfactory dysfunction a7 days after admission; the remaining patients presented with gustatory and olfactory symptoms prior to hospital admission. In the ER, only 26.3 % (n=21) of patients reported olfactory-gustatory dysfunction. ER physicians were more likely to report positive than negative

1  
2  
3 clinical findings (90.5% vs. 9.5%, respectively), OR: 4.6 [0.97-21.95 IC: 95 p= 0.039]. Among  
4  
5 classic pneumonia symptoms, fever was present in 89% (n=71) of patients. It was also the  
6  
7 most frequent consulted symptom in 53.8% (n=43) of patients who visited the ER. The  
8  
9 second most common symptom was coughing, being present in 77.5% (n=62) of cases,  
10  
11 followed by dyspnea in 58.8% (47%), asthenia in 56.3% (n=45), myalgia in 50% (n=40),  
12  
13 hyporexia in 38% (n=33), vomiting in 8.8 % (n=7) and skin lesions in 6.3% (n=5) [Figure 2].  
14  
15 Vomiting and skin lesions were uncommon. Furthermore, hyporexia was associated with  
16  
17 gustative dysfunction, OR: 4.1 [1.23 to 13.67 IC: 95 p= 0.016]. An association between cough  
18  
19 and the presence of gustatory and olfactory dysfunction was also observed, OR: 1.2 [0.12  
20  
21 to12.86 IC: 95, p= 0.046] [Table 1].  
22  
23  
24  
25  
26  
27

28 Per laboratory abnormalities, C-reactive protein (CRP) values were elevated upon admission  
29  
30 in 91.8% of cases; lymphopenia was present in 98.8% of cases. Other common findings  
31  
32 included elevated levels of lactate dehydrogenase (76.2% of cases), D-dimer (66.2%) and  
33  
34 serum ferritin (63.2%) [Table 2].  
35  
36  
37

38 Differences between AST and ALT values were observed between patients with gustatory-  
39  
40 olfactory dysfunction and those without symptoms [(33 vs. 61 UI/l) p=0.019 and (28 vs. 49)  
41  
42 p= 0.003, respectively]. No differences in other laboratory findings were found between the  
43  
44 studied groups [Table 2].  
45  
46  
47  
48  
49  
50

### 51 **Treatment prescribed**

52 All patients received hydroxychloroquine and azithromycin. In approximately 91.3 % (n=73)  
53  
54 of patients, lopinavir boosted with ritonavir was administered; 38.8% (n=31), interleukin  
55  
56 blockers; and 30.4% (n=24), corticosteroids. In 18.8% (n=15) of patients, teicoplanin was  
57  
58  
59  
60

1  
2  
3 administered, whereas in 7.6% (n=6) of patients, interferon was administered. Oxygen  
4  
5 supplementation and intubation were required in 69.8% (n=55) and 10% (5%) of patients,  
6  
7 respectively. No differences were observed between study groups [Table 3].  
8  
9

### 10 11 **Clinical outcomes**

12  
13 A total of 90% (n=73) of patients were discharged upon completion of the study period and  
14  
15 13.8% (n=11) required ICU admission during hospitalization, of whom none died. After  
16  
17 discharge, 87% (n=67) of patients were followed up via a telemedicine consultation for any  
18  
19 possible changes in status. No readmission episodes were recorded.  
20  
21

22  
23  
24 In terms of ICU admission, LOS, SpO<sub>2</sub>/FiO<sub>2</sub> ratio, oxygen supplementation, respiratory  
25  
26 distress or organizing pneumonia. No association was observed in outcomes between  
27  
28 patients with gustatory and olfactory dysfunction and patients without gustatory and  
29  
30 olfactory dysfunction. Pulmonary embolism was associated with the absence of gustatory  
31  
32 and olfactory dysfunction (21% vs 0) p=0.0001 [Table 3].  
33  
34  
35

### 36 37 **Gustatory and olfactory outcomes**

38  
39 Of the 59 patients with gustatory and olfactory dysfunction, 50 were reassessed for follow-  
40  
41 up. At day 7 after discharge, 20% (n=10) of these patients had recovered gustatory and  
42  
43 olfactory function. Recovery rates at day 14, 30 and 45 were 28% (n=14), 56% (n=28) and  
44  
45 84% (n=42), respectively. The median time of olfactory-gustatory recovery was 14 (7-30)  
46  
47 days [Figure 3].  
48  
49

50  
51  
52 Time of olfactory-gustatory recovery was positively correlated with age (r: 0.48 p= 0.03) and  
53  
54 ferritin levels (r: 0.353 p=0.037). No correlations with severity of respiratory function or any  
55  
56 other abnormal laboratory values were found.  
57  
58

## **Discussion**

This is a prospective study evaluating the prevalence of gustatory and olfactory dysfunction in hospitalized patients. We found a prevalence of 74% in all patients admitted to a hospital ward with COVID-19 pneumonia who could be questioned. In a previous study in hospitalized patients, overall prevalence was reported at 33% **(11)**. The main reasons for this discrepancy could be attributed to the retrospective design of that study and an unidentified prevalence of gustatory and olfactory dysfunction of 53% in this prospective cohort due to reassessment of ER electronic health records in hospitalization wards. In fact, brief communication reports in Italy have already acknowledged a self-reported prevalence of gustatory and olfactory dysfunction of 19 % in retrospective charts **(16)**.

In our cohort, gustatory and olfactory dysfunction syndrome was almost as prevalent as fever and cough, two classic symptoms of viral pneumonia. Within the context of flu-like symptoms and gustatory-olfactory dysfunction syndrome, the possibility of COVID-19 infection is worth considering. In a recent case-control study, gustatory and olfactory dysfunction were 10 times more common in patients with positive PCR testing results than in those who tested negative for the COVID-19 infection **(17)**.

Our study reported anosmia in 55% of cases, whereas investigators Lechein *et al.* reported anosmia in 86% of cases within the setting of a symptom-oriented, otorhinolaryngology-specialized consultation. Patients in that study were younger, without comorbidities and primarily health care providers, contrasting our older cohort of hospitalized patients who presented with more comorbidities. Similarly, with results being obtained by quantitative testing of sense of smell, an Iranian case-control study reported olfactory changes in nearly 98% of patients with COVID-19 and a median age of 46 years. This study suggests that

1  
2  
3 quantitative testing of hyposmia might serve as a rapid, alternative diagnostic approach for  
4  
5 SARS-CoV-2 screening **(18)**. However, the role of this test in older patients remains unclear  
6  
7 given age-related changes that occur in olfactory function **(19)**.  
8  
9

10  
11 Similar clinical signs and symptoms were observed between patients with and without  
12  
13 gustatory and olfactory dysfunction. Coughing was observed more frequently in patients  
14  
15 with gustatory and olfactory dysfunction, whereas a more severe respiratory syndrome was  
16  
17 not. Gustatory dysfunction was associated with hyporexia, which could affect a patient's  
18  
19 quality of life and daily activities especially in cases of persistence **(20-21)**.  
20  
21  
22

23  
24 Additionally, no major alterations in laboratory values were observed. A mild-to-moderate  
25  
26 elevation of liver enzymes were common in the absence of gustatory and olfactory  
27  
28 dysfunction symptoms; no case of acute liver failure was reported. Although an explanation  
29  
30 for these findings is difficult to provide, this observation may be due to inflammatory  
31  
32 changes in the liver or in relation to a different tissue expression of receptors and entry  
33  
34 molecules. ACE2 and TMPRSS2 are expressed in cells from multiple tissues, including  
35  
36 olfactory cells and liver; the degree to which tropism might affect different tissues has not  
37  
38 been well established **(22)**.  
39  
40  
41  
42  
43

44  
45 Clinical outcomes were similar in both groups, however pulmonary embolism occurs in 20%  
46  
47 of patients without gustatory and olfactory dysfunction symptoms. Confounding factors  
48  
49 associated with pulmonary embolism such as thromboprophylaxis could not be excluded  
50  
51 **(23)**, and there is some debate as to whether or not the presence of chemosensory disorder  
52  
53 is related to a better prognosis. In some studies, the absence of anosmia was associated  
54  
55 with a mild-to-moderate COVID-19 infection and outpatient care **(24)**. Other studies have  
56  
57 concluded that there is no prognostic value; however, the persistence of olfactory  
58  
59  
60

1  
2  
3 dysfunction at day 20 is associated with a more severe disease course (25). Disparity of  
4  
5 these findings might be explained by bias, e.g., severe and critically ill patients who are  
6  
7 vulnerable to self-neglect and by consequence, do not recognize chemosensory loss and  
8  
9 older patients failing to recognize an acute chemosensory loss due to a prior, unidentified  
10  
11 olfactory impairment related to senescence. Investigators Lechein *et al.* reported recovery  
12  
13 rates of olfactory function at 72% on day 8. Since our study represented olfactory and  
14  
15 gustatory outcomes together, performing comparisons might be difficult; nonetheless, we  
16  
17 found recovery rates of 20% on day 7 and 84% on day 45. Lastly, another possibility for this  
18  
19 discrepancy is the older age and more severe clinical manifestations of COVID-19 infection in  
20  
21 our cohort.  
22  
23  
24  
25  
26  
27

28 Although no correlation between etiopathogenic factors and the length of gustatory and  
29  
30 olfactory function recovery has been made thus far, the inflammatory response might play a  
31  
32 role. Our data supports that higher levels of ferritin and older age are associated with longer  
33  
34 recovery rates. Ferritin levels have been reported to be markedly higher in severe cases than  
35  
36 in moderate cases of COVID-19 with longer recovery rates; older age was associated with  
37  
38 higher disease severity (26-28).  
39  
40  
41  
42  
43

#### 44 **Strengths and weaknesses of the study**

45  
46

47 The main limitation of this study was the lack of validated olfactory and gustatory  
48  
49 questionnaires based on smell and taste components, which could have provided an even  
50  
51 more standardized approach. Another limitation was the impossibility to perform olfactory-  
52  
53 gustatory testing using quantitative measurements and to include accepted retronasal  
54  
55 olfaction test methods. In spite of this, a standardized, non-validated questionnaire was  
56  
57  
58  
59  
60

1  
2  
3 implemented and used systematically in all patients. Consecutive patients were included in  
4  
5 this study to minimize selection bias, although selection could be a cause of bias in our data.  
6  
7

8  
9 The study population selected is limited to a single center, representing hospitalized patients  
10  
11 mostly and excluding milder cases without pulmonary involvement and the most critical  
12  
13 cases with direct ICU admission. Moreover, not all of the patients had microbiologically-  
14  
15 confirmed cases of infection or underwent complete follow-up after hospital discharge.  
16  
17  
18  
19  
20  
21

## 22 **Conclusions and policy implications**

23  
24  
25  
26 There is high prevalence of gustatory and olfactory dysfunction in hospitalized patients with  
27  
28 COVID-19 pneumonia. Self-reporting rates are low in our population. Clinical outcomes were  
29  
30 not related with presence or the absence of gustatory and olfactory dysfunction in hospitalized  
31  
32 patients.  
33  
34  
35  
36  
37  
38  
39  
40  
41  
42  
43  
44  
45  
46  
47  
48  
49  
50  
51  
52  
53  
54  
55  
56  
57  
58  
59  
60



1  
2  
3 **Acknowledgements:** HIV Unit: Jose-Luis Blanco, Maria Martinez-Rebollar, Esteban Martinez, Josep  
4 Mallolas, Pilar Callau. All the personnel of Medical Intensive Care Unit: Josep Maria Nicolás, Pedro  
5 Castro, Sara Fernández and Adrian Téllez. Department of International Health: Alex Almuedo-Riera,  
6 Jose Muñoz, Daniel Camprubi Ferrer, Maria Teresa de Alba, Marc Fernandez, Elisabet Ferrer, Berta  
7 Grau, Helena Marti, Magdalena Muelas, Maria Jesus Pinazo, Natalia Rodríguez, Montserrat Roldan,  
8 Carme Subira, Isabel Vera, Nana Williams.  
9

10  
11  
12  
13  
14  
15  
16  
17 We would also like to thank Anthony Armenta for providing medical editing assistance in English.  
18

19  
20 **Financial disclosure:** No funding to be disclosed. All the authors are independent from the funding  
21 organization.  
22  
23

24  
25 **Competing Interest statement:** The authors declare no competing interest.  
26

27  
28 **Contributorship statement :** AI, CC, MC, PA,BT, AGC, VR, DA, NGP, MHM, LA, JR, FM, LDL, LL, PPA,  
29 IM, ML, JA, AR, LM, MB, EMG, AM, MS , performed clinical assessments. AI and FG designed the  
30 study, contributed to data analysis and wrote the first draft of the manuscript. AI, CC, MC, LL, MT  
31 were responsible for data entry. AI, CGV, JAM, IA, AS, LM, EG, VDB, CL, JGP, FG, critically reviewed  
32 the manuscript and agreed on its final version.  
33  
34  
35  
36  
37  
38

39  
40 **Transparency statement:** All the information displayed in the present manuscript is an honest,  
41 accurate, and transparent account of the study being reported; that no important aspects of the  
42 study have been omitted; and that any discrepancies from the study as originally planned (and, if  
43 relevant, registered) have been explained.  
44  
45  
46  
47  
48

49  
50 **Data sharing statement:** Extra data will be available by emailing [ajinciar@clinic.cat](mailto:ajinciar@clinic.cat)  
51

52  
53 **Patient and public involvement:** Patients were not involved in the study described; there will be an  
54 enlisting of patients to disseminate the research findings to the general population in primary care  
55 settings.  
56  
57  
58

**Table 1. Baseline characteristics according to the presence of gustatory and olfactory dysfunction in patients with COVID-19 pneumonia.**

| Variable                              | Cohort      | GOD        | Absence of GOD | p Value      |
|---------------------------------------|-------------|------------|----------------|--------------|
| N                                     | 80          | 59         | 21             |              |
| Median (IQR) Age                      | 57 (42-70)  | 58 (44-69) | 55 (38-72)     | 0.782        |
| Male, n (%)                           | 50 (63)     | 34 (59)    | 15 (71)        | 0.325        |
| RT-PCR (+) nasopharyngeal swab, n (%) | 73 (91.2)   | 55 (93)    | 19 (86)        | 0.985        |
| European, n (%)                       | 57 (71)     | 37 (64)    | 14 (67)        | 0.940        |
| Co-existing illness, n (%)            | 40 (50)     | 27 (47)    | 12 (57)        | 0.370        |
| Hypertension, n (%)                   | 22 (29)     | 17 (29)    | 5 (23)         | 0.738        |
| Diabetes, n (%)                       | 8 (10)      | 6 (10)     | 2 (10)         | 0.932        |
| Pulmonary disease, n (%)              | 8 (10)      | 7 (14)     | 1 (5)          | 0.168        |
| Oncological disease, n (%)            | 5 (6)       | 2 (3)      | 3 (14)         | 0.76         |
| Heart disease, n (%)                  | 5(6)        | 3 (5)      | 2 (11)         | 0.453        |
| Health care worker, n (%)             | 11(14)      | 3 (14)     | 3 (14)         | 0,934        |
| Median (IQR) days from onset to ER    | 8 (5.25-10) | 8 (5-11)   | 7 (5.5-9)      | 0.135        |
| Fever, n (%)                          | 71 (89)     | 52 (88)    | 19 (91)        | 0.771        |
| Cough, n (%)                          | 62 (78)     | 49 (83)    | 13(62)         | <b>0.046</b> |
| Shortness of breath, n (%)            | 52 (65)     | 35 (59)    | 17 (81)        | 0.074        |
| Asthenia, n (%)                       | 45 (56)     | 33 (56)    | 12 (57)        | 0.934        |
| Myalgia, n (%)                        | 40 (50)     | 34 (53)    | 9 (43)         | 0.147        |
| Diarrhea, n (%)                       | 35 (44)     | 25 (42)    | 10 (48)        | 0.677        |
| Hyporexia, n (%)                      | 33(38)      | 29 (49)    | 4 (19)         | <b>0.016</b> |
| Headache, n (%)                       | 28 (35)     | 24 (41)    | 4 (19)         | 0.061        |
| Arthralgia, n (%)                     | 10(13)      | 8(14)      | 2 (10)         | 0.545        |
| Chest Pain, n (%)                     | 9 (11)      | 6 (10)     | 3 (14)         | 0.608        |
| Odynophagia n, (%)                    | 7 (9)       | 6 (10)     | 1 (5)          | 0.451        |
| Vomiting, n (%)                       | 7 (9)       | 6 (10)     | 1 (5)          | 0.451        |
| Rash, n (%)                           | 5 (6)       | 5 (9)      | 0              | 0.168        |
| Rhinorrhea                            | 2 (3)       | 1 (2)      | 1 (5)          | -            |

IQR, interquartile range; GOD, Gustatory and olfactory dysfunction.

**Table 2. Laboratory values according to the presence of gustatory and olfactory dysfunction in patients with COVID-19 pneumonia.**

| Variable                                       | Cohort         | GOD               | Absence of GOD  | p Value      |
|------------------------------------------------|----------------|-------------------|-----------------|--------------|
| <b>N</b>                                       | 80             | 59                | 21              |              |
| CRP mg/dL [ $< 1.0$ ]                          | 9 (3-14)       | 8 (3-16)          | 10 (5-13)       | 0.838        |
| LDH mg/dL [ $< 234$ ]                          | 310 (268-386)  | 309 (250-367)     | 342 (260-453)   | 0.109        |
| Ferritin mg/dL [ $< 200$ ]                     | 716 (256-1322) | 592 (241-1255)    | 1066 (300-1552) | 0.093        |
| AST UI/L<br>[5.0 - 40.0]                       | 39 (25-61)     | 33 (22-50)        | 61 (39-94)      | <b>0.003</b> |
| ALT UI/L<br>[5.0 - 40.0]                       | 29 (20-68)     | 28 (19-55)        | 49 (27-102)     | <b>0.019</b> |
| BT mg/dL<br>[0.20 - 1.20]                      | 0.64 (0.8-0.4) | 0.6 (0.4-0.75)    | 0.8 (0.55-1.05) | 0.560        |
| LYM cells/mm <sup>3</sup><br>[4.00 - 11.00]    | 0.9 (0.6-1.3)  | 0.9 (0.6- 1.3)    | 0.8 (0.6-1.5)   | 0.820        |
| D-dimer ng/ml [ $< 500$ ]                      | 800 (400-1200) | 700 (400-1100)    | 1000 (600-1800) | 0.251        |
| Platelets cells/mm <sup>3</sup><br>[130 - 400] | 212 (168-266)  | 213(170-265)      | 209 (150-281)   | 0.735        |
| Creatinine mg/dL<br>[0.30 - 1.30]              | 0.6 (0.7-09)   | 0.78 (0.63-0.91)  | 0.86 (68-0.98)  | 0.630        |
| Calcium meq/l[8.5<br>– 9.5]                    | 8.2 (8-8.5)    | 8.2 (8-8.6)       | 8.1 (7.8 --8.3) | 0.735        |
| CD4 Cels/ $\mu$ L [530 -<br>1300]              | 356 (248-579)  | 358.5 (258.7-630) | 328 (225-464)   | 0.414        |
| CD8 Cels/ $\mu$ L [330 -<br>920]               | 225 (147-353)  | 241 (148 -256)    | 186 (140.7-396) | 0.934        |
| CD3 Cels/ $\mu$ L [1000<br>- 2200]             | 630 (404-1014) | 676 (459.5-1035)  | 496 (386-792)   | 0.310        |

CRP, C-reactive protein; LDH, Lactate dehydrogenase; AST, Aspartate aminotransferase; ALT, Alanine transferase; BT, total bilirubin; LYM, Lymphocyte; NEU, Neutrophil; CD4, CD4+ count; CD8, CD8+ count; GOD, Gustatory and olfactory dysfunction.

**Table 3. Clinical outcomes according to the presence of gustatory and olfactory dysfunction in patients with COVID-19 pneumonia.**

| Variable                                       | Cohort        | GOD           | Absence of GOD | p Value |
|------------------------------------------------|---------------|---------------|----------------|---------|
| N                                              | 80            | 59            | 21             |         |
| LOS (IQR)                                      | 8 (4-11.75)   | 8 (4.2-11)    | 7 (4-14)       | 0.836   |
| SpO <sub>2</sub> /fiO <sub>2</sub> ratio (IQR) | 448 (245-247) | 451 (257-471) | 391 (197-471)  | 0.346   |
| Lopinavir/ritonavir, n (%)                     | 73 (94)       | 52 (91)       | 21 (100)       | 0.161   |
| Interferon, n (%)                              | 6 (8)         | 4 (7)         | 2 (10)         | 0.638   |
| Corticosteroid, n (%)                          | 24 (30)       | 15 (3)        | 9 (43)         | 0.147   |
| Interleukin blocker, n (%)                     | 33 (41)       | 22 (37)       | 11 (52)        | 0.228   |
| ICU admission, n (%)                           | 11 (14)       | 7 (12)        | 4 (19)         | 0.412   |
| Complication n, (%)                            | 32 (41)       | 20 (35)       | 12 (57)        | 0.07    |
| Oxygen requirement, n (%)                      | 55 (69)       | 40 (68)       | 15 (71)        | 0.758   |
| Orotraqueal intubation, n (%)                  | 8             | 5 (8.5)       | 3 (14)         | 0.867   |
| Respiratory distress, n (%)                    | 31            | 20 (34)       | 11 (52)        | 0.135   |
| Pulmonary embolism, n (%)                      | 5 (6)         | 0             | 5 (23)         | 0.0001  |
| Organizing pneumonia, n (%)                    | 10 (13)       | 5 (9)         | 5 (24)         | 0.068   |

LOS, length of stay; SpO<sub>2</sub>, peripheral capillary oxygen saturation; FiO<sub>2</sub>, Fraction of Inspired Oxygen; IQR, Interquartile range; GOD, Gustatory and olfactory dysfunction.

1  
2  
3  
4  
5  
6  
7  
8  
9  
10  
11  
12  
13  
14  
15  
16  
17  
18  
19  
20  
21  
22  
23  
24  
25  
26  
27  
28  
29  
30  
31  
32  
33  
34  
35  
36  
37  
38  
39  
40  
41  
42  
43  
44  
45  
46  
47  
48  
49  
50  
51  
52  
53  
54  
55  
56  
57  
58  
59  
60

For peer review only

Figure 1. Study Flow Chart. Day 0: If the patient meets criteria is included in the study. Blue boxes represent individuals on follow-up with gustatory-olfactory dysfunction, lilac boxes represents individuals in which the recovery event develops. Gray boxes represent individuals lost to follow up. White boxes represent timelines and mode of follow-up.

1  
2  
3  
4  
5  
6  
7  
8  
9  
10  
11  
12  
13  
14  
15  
16  
17  
18  
19  
20  
21  
22  
23  
24  
25  
26  
27  
28  
29  
30  
31  
32  
33  
34  
35  
36  
37  
38  
39  
40  
41  
42  
43  
44  
45  
46  
47  
48  
49  
50  
51  
52  
53  
54  
55  
56  
57  
58  
59  
60

For peer review only

Figure 2. General symptoms in patients with COVID-19 pneumonia in absolute numbers (n=80), GOD; gustatory and olfactory dysfunction.

1  
2  
3  
4  
5  
6  
7  
8  
9  
10  
11  
12  
13  
14  
15  
16  
17  
18  
19  
20  
21  
22  
23  
24  
25  
26  
27  
28  
29  
30  
31  
32  
33  
34  
35  
36  
37  
38  
39  
40  
41  
42  
43  
44  
45  
46  
47  
48  
49  
50  
51  
52  
53  
54  
55  
56  
57  
58  
59  
60

Figure 3. Recovery rates of gustatory and olfactory dysfunction trough time at follow up post discharge (n=50)

## References

1. COVID-19 Coronavirus Pandemic. Last updated: September 5, 2020, 15:33 GMT  
<https://www.worldometers.info/coronavirus/> Accessed September 5, 2020.
2. Nishiura H, Kobayashi T, Suzuki A, et al. **Estimation of the asymptomatic ratio of novel coronavirus infections (COVID-19)** [published online ahead of print, 2020 Mar 13]. *Int J Infect Dis.* 2020;S1201-9712(20)30139-9. doi:10.1016/j.ijid.2020.03.020.
3. Bai Y, Yao L, Wei T, et al. **Presumed Asymptomatic Carrier Transmission of COVID-19** [published online ahead of print, 2020 Feb 21]. *JAMA.* 2020;323(14):1406–1407. doi:10.1001/jama.2020.2565
4. Zhang J, Tian S, Lou J, **Chen Y. Familial cluster of COVID-19 infection from an asymptomatic.** *Crit Care.* 2020;24(1):119. Published 2020 Mar 27. doi:10.1186/s13054-020-2817-7
- 5.- **WHO. COVID-19: Operational guidance for maintaining essential health services during an outbreak.** <https://www.who.int/publications-detail/covid-19-operational-guidance-for-maintaining-essential-health-services-during-an-outbreak>. Accessed April 30, 2020.
6. Suzuki M1, Saito K, Murakami S et al. **Identification of viruses in patients with postviral olfactory dysfunction.** *Laryngoscope.* 2007 Feb;117(2):272-7.
7. Smeets M, Veldhuizen M, Galle S, et al. **Sense of smell disorder and health-related quality of life.** *Rehabil Psychol.* 2009;54:404–412.
8. Wang Z, Yang B, Li Q, Wen L, Zhang R. **Clinical Features of 69 Cases with Coronavirus Disease 2019 in Wuhan, China.** *Clin Infect Dis.* 2020; pii: ciaa272. doi: 10.1093/cid/ciaa272
9. Huang C, Wang Y, Li X, et al. **Clinical features of patients infected with 2019 novel coronavirus in Wuhan, China** [published correction appears in *Lancet.* 2020 Jan 30;:]. *Lancet,* 2020 ; 395(10223):497–506.



1  
2  
3 10.- The Novel Coronavirus Pneumonia Emergency Response Epidemiology Team. **The**  
4 **Epidemiological Characteristics of an Outbreak of 2019 Novel Coronavirus Diseases (COVID-19)**  
5 **China, 2020.** China CDC Weekly, 2020 ; 2:113-22.  
6  
7  
8

9  
10 11. Giacomelli A, Pezzati L, Galli M et al **Self-reported olfactory and taste disorders in SARS-CoV-2**  
11 **patients: a cross-sectional study.** Clinical Infectious Disease. 2020 Mar 26. pii: ciaa330. doi:  
12 10.1093/cid/ciaa330  
13  
14  
15

16  
17 12. Ollarves-Carrero MF, Rodriguez-Morales AG, Bonilla-Aldana DK, Rodriguez-Morales AJ. **Anosmia in a**  
18 **healthcare worker with COVID-19 in Madrid, Spain** [published online ahead of print, 2020 Apr 13]. Travel  
19 Med Infect Dis. 2020;101666. doi:10.1016/j.tmaid.2020.101666  
20  
21  
22

23  
24 13. Gane SB, Kelly C, Hopkins C. **Isolated sudden onset anosmia in COVID-19 infection. A novel**  
25 **syndrome?** [published online ahead of print, 2020 Apr 2]. Rhinology. 2020;10.4193/Rhin20.114.  
26  
27  
28  
29  
30  
31  
32

33 14. Lechien JR, Chiesa-Estomba CM, De Siaty DR, et al. **Olfactory and gustatory dysfunctions as a**  
34 **clinical presentation of mild-to-moderate forms of the coronavirus disease (COVID-19): a**  
35 **multicenter European study** [, 2020 Apr 6]. Eur Arch Otorhinolaryngol. 2020;10.1007/s00405-020-  
36 05965-1. doi:10.1007/s00405-020-05965-1  
37  
38  
39  
40  
41

42 15. **Case definition and European surveillance for COVID-19, as of 2 March 2020.**  
43 [https://www.ecdc.europa.eu/en/case-definition-and-european-surveillance-human-infection-](https://www.ecdc.europa.eu/en/case-definition-and-european-surveillance-human-infection-novel-coronavirus-2019-ncov)  
44 [novel-coronavirus-2019-ncov](https://www.ecdc.europa.eu/en/case-definition-and-european-surveillance-human-infection-novel-coronavirus-2019-ncov). Accessed April 30, 2020.  
45  
46  
47  
48  
49

50  
51 16. Vaira LA, Salzano G, Deiana G, De Riu G. **Anosmia and Ageusia: Common Findings in COVID-19**  
52 **Patients** [, 2020 Apr 1]. Laryngoscope. 2020;10.1002/lary.28692. doi:10.1002/lary.28692  
53  
54  
55  
56  
57  
58  
59  
60

- 1  
2  
3 17. Yan CH, Faraji F, Prajapati DP, Boone CE, DeConde AS. Association **of chemosensory**  
4 **dysfunction and Covid-19 in patients presenting with influenza-like symptoms** [, 2020 Apr 12]. Int  
5 **Forum Allergy Rhinol.** 2020;10.1002/alr.22579. doi:10.1002/alr.22579  
6  
7  
8  
9  
10 18. Moein ST, Hashemian SMR, Mansourafshar B, Khorram-Tousi A, Tabarsi P, Doty RL. **Smell**  
11 **dysfunction: a biomarker for COVID-19** [published online ahead of print, 2020 Apr 17]. Int Forum  
12 **Allergy Rhinol.** 2020;10.1002/alr.22587. doi:10.1002/alr.22587  
13  
14  
15  
16  
17  
18 19. Doty RL, Shaman P, Applebaum SL, Giberson R, Siksorski L, Rosenberg L. **Smell identification**  
19 **ability: changes with age.** Science 1984; 226: 1441-3.  
20  
21  
22  
23 20. Miwa T, Furukawa M, Tsukatani T, Costanzo RM, DiNardo LJ, Reiter ER. **Impact of olfactory**  
24 **impairment on quality of life and disability.** Arch Otolaryngol Head Neck Surg. 2001;127(5):497–  
25  
26 **503.** doi:10.1001/archotol.127.5.497  
27  
28  
29  
30  
31 21. Rusthen S, Young A, Herlofson BB, et al. **Oral disorders, saliva secretion, and oral health-**  
32 **related quality of life in patients with primary Sjögren's syndrome.** Eur J Oral Sci.  
33  
34 2017;125(4):265–271. doi:10.1111/eos.12358  
35  
36  
37  
38 22. Sungnak W, Huang N, Bécavin C, et al. **SARS-CoV-2 entry factors are highly expressed in nasal**  
39 **epithelial cells together with innate immune genes** [published online ahead of print, 2020 Apr  
40  
41 23]. Nat Med. 2020;10.1038/s41591-020-0868-6. doi:10.1038/s41591-020-0868-6  
42  
43  
44  
45  
46 23. Tang N, Bai H, Chen X, Gong J, Li D, Sun Z. **Anticoagulant treatment is associated with**  
47 **decreased mortality in severe coronavirus disease 2019 patients with coagulopathy.** J Thromb  
48  
49 **Haemost.** 2020 Mar 27. doi: 10.1111/jth.14817  
50  
51  
52  
53  
54  
55  
56  
57  
58  
59  
60

1  
2  
3 24. Yan CH, Faraji F, Prajapati DP, Ostrander BT, DeConde AS. **Self-reported olfactory loss associates with**  
4 **outpatient clinical course in COVID-19.** *Int Forum Allergy Rhinol.* 2020;10(7):821-831.  
5  
6 doi:10.1002/alr.22592  
7  
8

9  
10 25. Vaira LA, Hopkins C, Petrocelli M, et al. **Do olfactory and gustatory psychophysical scores have**  
11 **prognostic value in COVID-19 patients? A prospective study of 106 patients.** *J Otolaryngol*  
12 *Head Neck Surg.* 2020;49(1):56. Published 2020 Aug 6.  
13  
14  
15  
16  
17 doi:10.1186/s40463-020-00449-y  
18

19  
20 26. Ruan Q, Yang K, Wang W, Jiang L, Song J. **Clinical predictors of mortality due to COVID-19**  
21 **based on an analysis of data of 150 patients from Wuhan, China** [published online ahead of  
22 print, 2020 Mar 3] [published correction appears in *Intensive Care Med.* 2020 Apr 6;:]. *Intensive*  
23 *Care Med.* 2020;1–3. doi:10.1007/s00134-020-05991-x  
24  
25  
26  
27

28  
29  
30 27. Yang X, Yu Y, Xu J, Shu H, Xia J, Liu H, et al. **Clinical course and outcomes of critically ill**  
31 **patients with SARS-CoV-2 pneumonia in Wuhan, China: a single-centered, retrospective,**  
32 **observational study.** *Lancet Respir Med* 2020. doi:10.1016/S2213-2600(20)30079-5.  
33  
34  
35  
36

37 28. Zhou F, Yu T, Du R, Fan G, Liu Y, Liu Z, et al. **Clinical course and risk factors for mortality of**  
38 **adult inpatients with COVID-19 in Wuhan, China: a retrospective cohort study.** *Lancet*  
39  
40 2020.Zhou F, Yu T, Du R, Fan G, Liu Y, Liu Z, et al. Clinical course and risk factors for mortality of  
41  
42 adult inpatients with COVID-19 in Wuhan, China: a retrospective cohort study. *Lancet* 2020.  
43  
44  
45  
46  
47  
48  
49  
50  
51  
52  
53  
54  
55  
56  
57

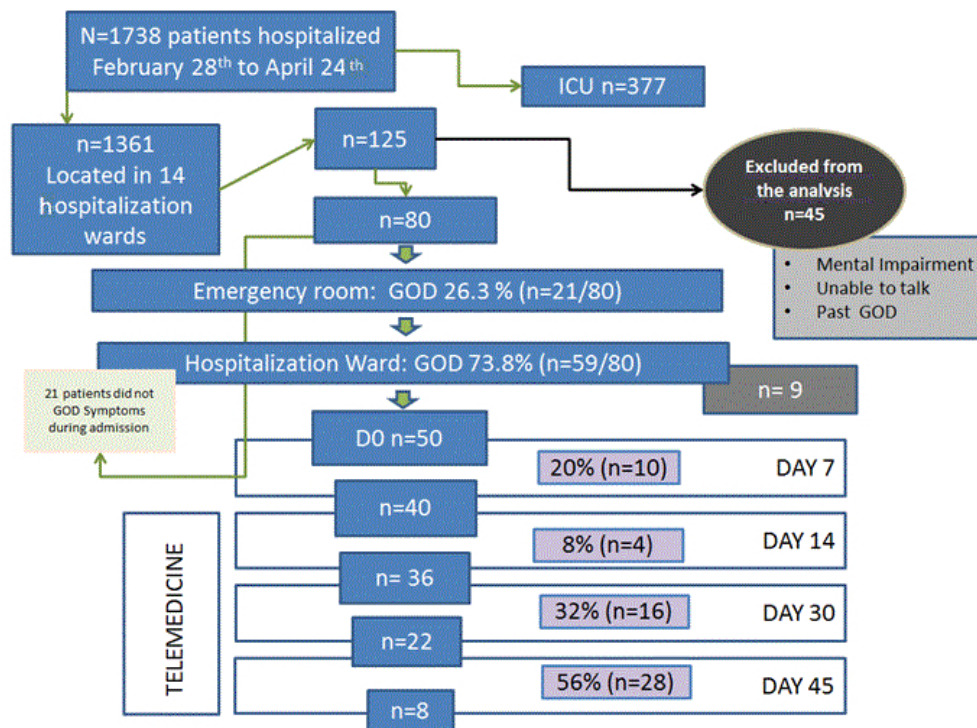

Caption : Figure 1. Study Flow Chart. Day 0: If the patient meets criteria is included in the study. Blue boxes represent individuals on follow-up with gustatory-olfactory dysfunction, lilac boxes represents individuals in which the recovery event develops. Gray boxes represent individuals lost to follow up. White boxes represent timelines and mode of follow-up.

244x190mm (72 x 72 DPI)

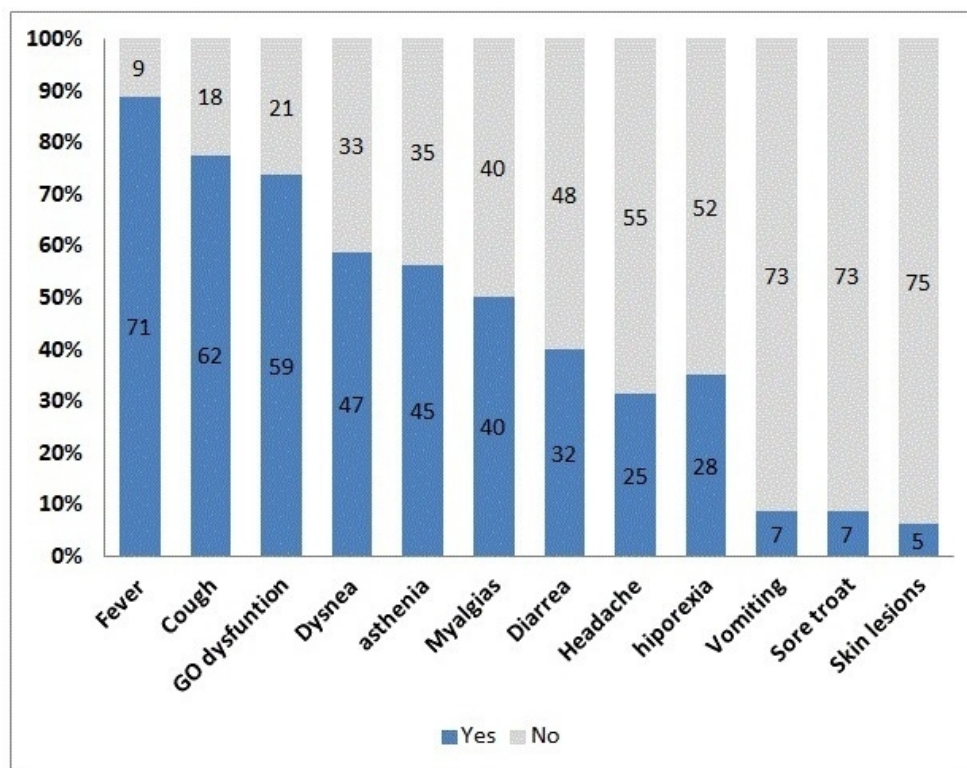

Figure 2. General symptoms in patients with COVID-19 pneumonia in absolute numbers (n=80), GOD; gustatory and olfactory dysfunction

53x43mm (300 x 300 DPI)

1  
2  
3  
4  
5  
6  
7  
8  
9  
10  
11  
12  
13  
14  
15  
16  
17  
18  
19  
20  
21  
22  
23  
24  
25  
26  
27  
28  
29  
30  
31  
32  
33  
34  
35  
36  
37  
38  
39  
40  
41  
42  
43  
44  
45  
46  
47  
48  
49  
50  
51  
52  
53  
54  
55  
56  
57  
58  
59  
60

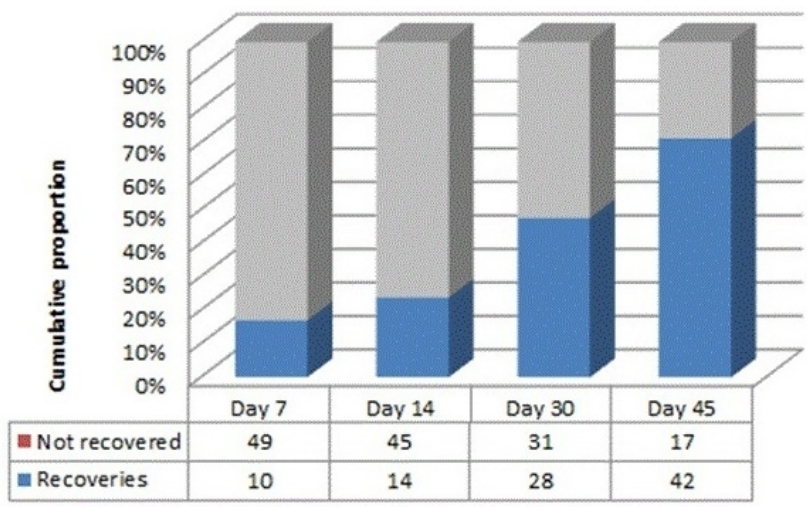

Figure 3. Recovery rates of gustatory and olfactory dysfunction trough time at follow up post discharge (n=50)

59x37mm (300 x 300 DPI)



STROBE Statement—Checklist of items that should be included in reports of *cohort studies*

|                              | Item No | Recommendation                                                                                                                                                                                                                                                                                                         | Page No  |
|------------------------------|---------|------------------------------------------------------------------------------------------------------------------------------------------------------------------------------------------------------------------------------------------------------------------------------------------------------------------------|----------|
| <b>Title and abstract</b>    | 1       | (a) Indicate the study's design with a commonly used term in the title or the abstract<br>(b) Provide in the abstract an informative and balanced summary of what was done and what was found                                                                                                                          | 2,3<br>3 |
| <b>Introduction</b>          |         |                                                                                                                                                                                                                                                                                                                        |          |
| Background/rationale         | 2       | Explain the scientific background and rationale for the investigation being reported                                                                                                                                                                                                                                   | 5        |
| Objectives                   | 3       | State specific objectives, including any prespecified hypotheses                                                                                                                                                                                                                                                       | 6        |
| <b>Methods</b>               |         |                                                                                                                                                                                                                                                                                                                        |          |
| Study design                 | 4       | Present key elements of study design early in the paper                                                                                                                                                                                                                                                                | 7        |
| Setting                      | 5       | Describe the setting, locations, and relevant dates, including periods of recruitment, exposure, follow-up, and data collection                                                                                                                                                                                        | 7        |
| Participants                 | 6       | (a) Give the eligibility criteria, and the sources and methods of selection of participants. Describe methods of follow-up<br>(b) For matched studies, give matching criteria and number of exposed and unexposed                                                                                                      | 7,8      |
| Variables                    | 7       | Clearly define all outcomes, exposures, predictors, potential confounders, and effect modifiers. Give diagnostic criteria, if applicable                                                                                                                                                                               | 8        |
| Data sources/<br>measurement | 8*      | For each variable of interest, give sources of data and details of methods of assessment (measurement). Describe comparability of assessment methods if there is more than one group                                                                                                                                   | 8        |
| Bias                         | 9       | Describe any efforts to address potential sources of bias                                                                                                                                                                                                                                                              | 8        |
| Study size                   | 10      | Explain how the study size was arrived at                                                                                                                                                                                                                                                                              | 9        |
| Quantitative variables       | 11      | Explain how quantitative variables were handled in the analyses. If applicable, describe which groupings were chosen and why                                                                                                                                                                                           | 10       |
| Statistical methods          | 12      | (a) Describe all statistical methods, including those used to control for confounding<br>(b) Describe any methods used to examine subgroups and interactions<br>(c) Explain how missing data were addressed<br>(d) If applicable, explain how loss to follow-up was addressed<br>(e) Describe any sensitivity analyses | 9-10     |
| <b>Results</b>               |         |                                                                                                                                                                                                                                                                                                                        |          |
| Participants                 | 13*     | (a) Report numbers of individuals at each stage of study—eg numbers potentially eligible, examined for eligibility, confirmed eligible, included in the study, completing follow-up, and analysed<br>(b) Give reasons for non-participation at each stage<br>(c) Consider use of a flow diagram                        | 11       |
| Descriptive data             | 14*     | (a) Give characteristics of study participants (eg demographic, clinical, social) and information on exposures and potential confounders<br>(b) Indicate number of participants with missing data for each variable of interest<br>(c) Summarise follow-up time (eg, average and total amount)                         | 11       |
| Outcome data                 | 15*     | Report numbers of outcome events or summary measures over time                                                                                                                                                                                                                                                         | 13       |

|    |                          |    |                                                                                                                                                                                                              |    |
|----|--------------------------|----|--------------------------------------------------------------------------------------------------------------------------------------------------------------------------------------------------------------|----|
| 1  | Main results             | 16 | (a) Give unadjusted estimates and, if applicable, confounder-adjusted estimates and their precision (eg, 95% confidence interval). Make clear which confounders were adjusted for and why they were included | 11 |
| 2  |                          |    | (b) Report category boundaries when continuous variables were categorized                                                                                                                                    | 12 |
| 3  |                          |    | (c) If relevant, consider translating estimates of relative risk into absolute risk for a meaningful time period                                                                                             |    |
| 4  |                          |    |                                                                                                                                                                                                              |    |
| 5  |                          |    |                                                                                                                                                                                                              |    |
| 6  |                          |    |                                                                                                                                                                                                              |    |
| 7  |                          |    |                                                                                                                                                                                                              |    |
| 8  |                          |    |                                                                                                                                                                                                              |    |
| 9  | Other analyses           | 17 | Report other analyses done—eg analyses of subgroups and interactions, and sensitivity analyses                                                                                                               | 12 |
| 10 |                          |    |                                                                                                                                                                                                              |    |
| 11 | <b>Discussion</b>        |    |                                                                                                                                                                                                              |    |
| 12 |                          |    |                                                                                                                                                                                                              |    |
| 13 | Key results              | 18 | Summarise key results with reference to study objectives                                                                                                                                                     | 14 |
| 14 | Limitations              | 19 | Discuss limitations of the study, taking into account sources of potential bias or imprecision. Discuss both direction and magnitude of any potential bias                                                   | 16 |
| 15 |                          |    |                                                                                                                                                                                                              |    |
| 16 | Interpretation           | 20 | Give a cautious overall interpretation of results considering objectives, limitations, multiplicity of analyses, results from similar studies, and other relevant evidence                                   | 15 |
| 17 |                          |    |                                                                                                                                                                                                              |    |
| 18 |                          |    |                                                                                                                                                                                                              |    |
| 19 | Generalisability         | 21 | Discuss the generalisability (external validity) of the study results                                                                                                                                        | 16 |
| 20 |                          |    |                                                                                                                                                                                                              |    |
| 21 | <b>Other information</b> |    |                                                                                                                                                                                                              |    |
| 22 | Funding                  | 22 | Give the source of funding and the role of the funders for the present study and, if applicable, for the original study on which the present article is based                                                | 18 |
| 23 |                          |    |                                                                                                                                                                                                              |    |
| 24 |                          |    |                                                                                                                                                                                                              |    |

\*Give information separately for exposed and unexposed groups.

**Note:** An Explanation and Elaboration article discusses each checklist item and gives methodological background and published examples of transparent reporting. The STROBE checklist is best used in conjunction with this article (freely available on the Web sites of PLoS Medicine at <http://www.plosmedicine.org/>, Annals of Internal Medicine at <http://www.annals.org/>, and Epidemiology at <http://www.epidem.com/>). Information on the STROBE Initiative is available at <http://www.strobe-statement.org>.
